# Supplementary material
Source: PubMed Central journal article supplement (PMC3511760)
Supplement: 1214996109_sapp.pdf [file 1214996109_sapp.pdf]

**Hu, et al. Epitranscriptional orchestration of genetic reprogramming is an emergent property of stress-regulated cardiac microRNAs**

**Supplemental Information Appendix**

**TABLE OF CONTENTS**

|                                                 |              |
|-------------------------------------------------|--------------|
| <b>SUPPLEMENTARY FIGURES S1-S8</b> .....        | <b>1-7</b>   |
| LIST OF SUPPLEMENTARY FIGURES .....             | 1            |
| <i>Figure S1</i> .....                          | 1            |
| <i>Figure S2</i> .....                          | 1            |
| <i>Figure S3</i> .....                          | 3            |
| <i>Figure S4</i> .....                          | 4            |
| <i>Figure S5</i> .....                          | 4            |
| <i>Figure S6</i> .....                          | 5            |
| <i>Figure S7</i> .....                          | 6            |
| <i>Figure S8</i> .....                          | 7            |
| <b>SUPPLEMENTARY TABLES S1-S5</b> .....         | <b>8-66</b>  |
| LIST OF SUPPLEMENTARY TABLES .....              | 8            |
| <i>Table S1</i> .....                           | 9-18         |
| <i>Table S2</i> .....                           | 19-31        |
| <i>Table S3</i> .....                           | 32-62        |
| <i>Table S4</i> .....                           | 63-64        |
| <i>Table S5</i> .....                           | 65-66        |
| <b>SUPPLEMENTAL MATERIALS AND METHODS</b> ..... | <b>67-74</b> |

**Hu, et al. Epitranscriptional orchestration of genetic reprogramming is an emergent property of stress-regulated cardiac microRNAs**

**List of Supplementary Figures**

**Supplemental Figure S1.** *Expression of fetal gene program mRNAs in early cardiac hypertrophy 1 week after surgical pressure overloading.*

**Supplemental Figure S2.** *microRNA abundance in normal and early hypertrophying hearts.*

**Supplemental Figure S3.** *Hypertrophy-regulated cardiac microRNAs.*

**Supplemental Figure S4.** *Correlation in microRNA abundance between total cellular and RISC-associated RNA.*

**Supplemental Figure S5.** *Transcriptional signature of the actively hypertrophying pressure-overloaded mouse heart.*

**Supplemental Figure S6.** *Relationship of mRNA abundance in Argonaute 2 complexes to their stress-dependent regulation in the heart.*

**Supplemental Figure S7.** *Distinct functions of microRNA-regulated and microRNA-independent cardiac mRNAs*

**Supplemental Figure S8.** *Expression profiles of representative housekeeping, homeostatic, and stress-response cardiac microRNAs.*

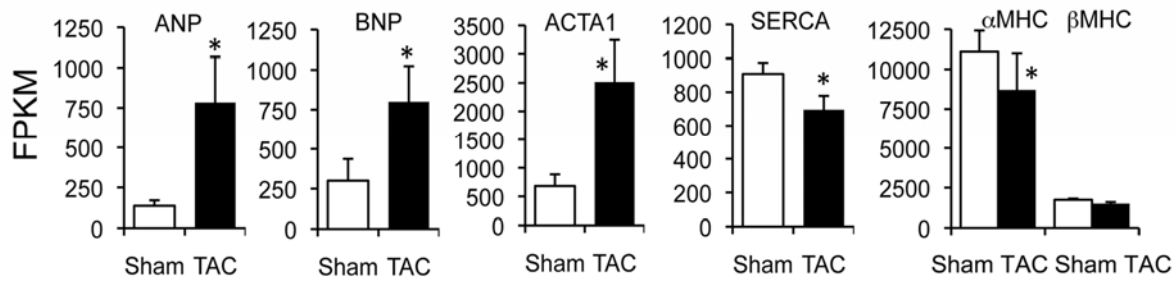

**Supplemental Figure S1.** Expression of fetal gene program mRNAs in early cardiac hypertrophy 1 week after surgical pressure overloading. ANP=atrial natriuretic peptide; BNP=brain natriuretic peptide; ACTA1=α skeletal actin; SERCA=sarcoplasmic reticular ATPase; MHC=myosin heavy chain. \*=P<0.05 vs sham.

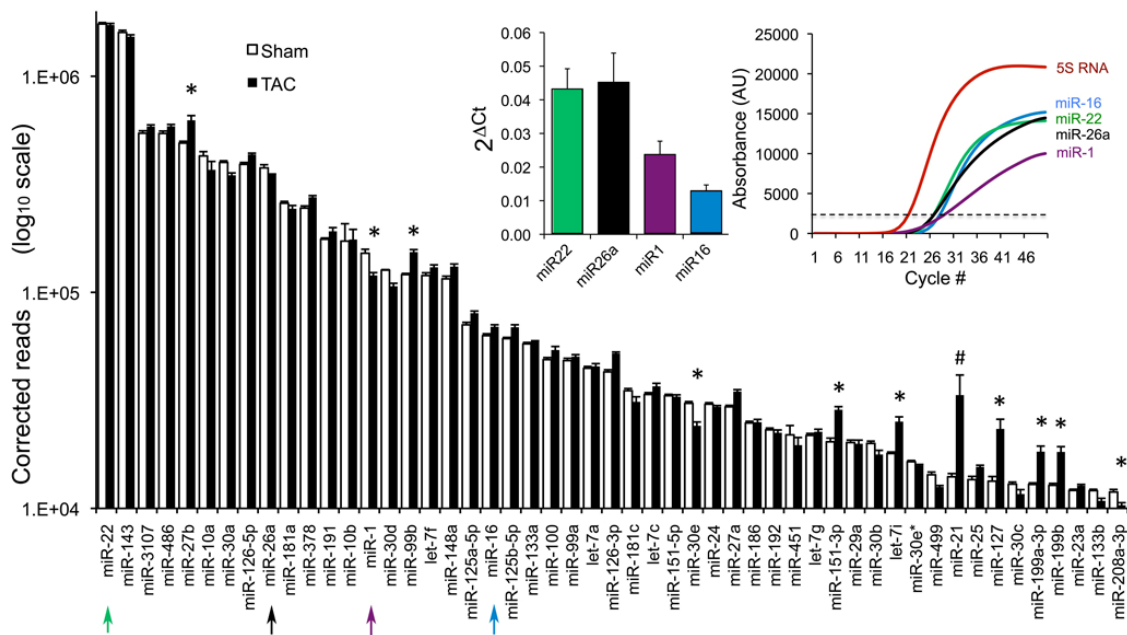

**Supplemental Figure S2.** microRNA abundance in normal and early hypertrophying hearts. Corrected microRNA sequencing reads (log<sub>10</sub> scale) of 50 most-abundant cardiac microRNAs for normal (white) and 1 week post TAC (black) hearts (n=5 each). Inset shows RT-qPCR measurements of four abundant microRNAs indicated by colored arrows. \*=P<0.03; #=P<0.08 vs sham.

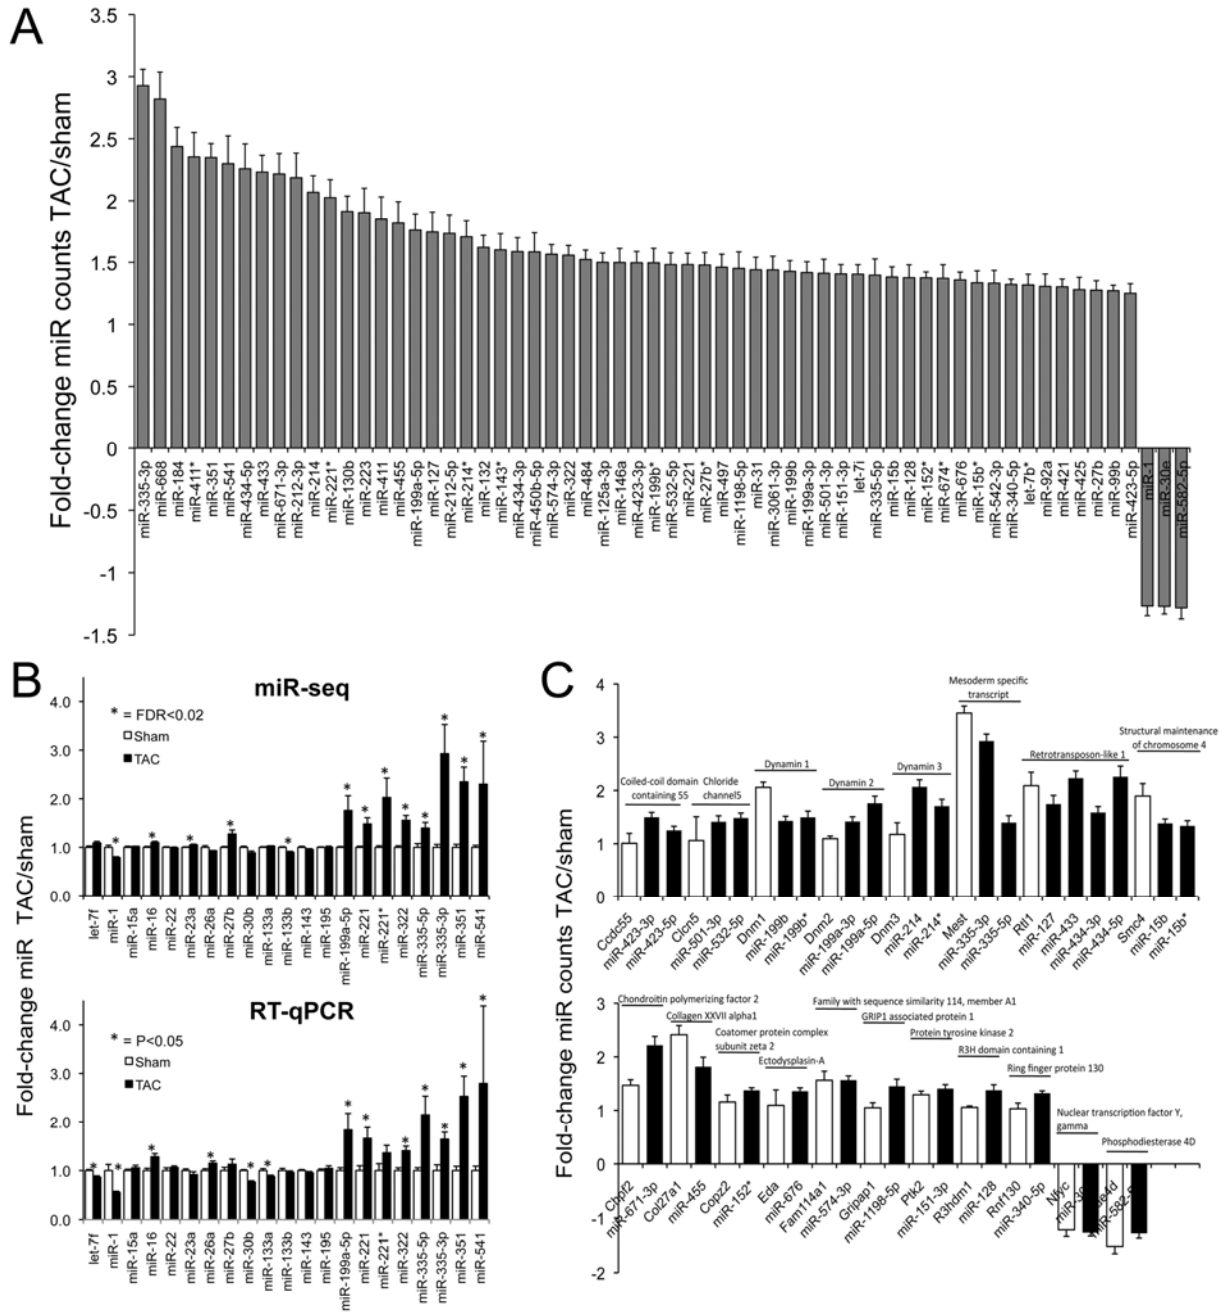

**Supplemental Figure S3. Hypertrophy-regulated cardiac microRNAs.** **A.** Cardiac microRNAs significantly regulated 1 week after acute cardiac pressure overloading are ranked according to degree of regulation (fold-change over RNA-Seq levels in sham-operated hearts), regardless of absolute abundance. **B.** Comparison of fold-change 1 week after pressure overloading for 21 representative microRNAs, assessed by genome-wide RNA-seq (top) or individual RT-qPCR (bottom). Note that P value threshold for statistical significance is genome-wide for RNA-Seq and paired t-test for RT-qPCR. Correlation of these RNA-Seq and RT-qPCR data is in Figure 2d. **C.** Change in relative abundance of microRNAs (black bars) encoded within their parent mRNAs (white bars) in pressure overload hypertrophy.

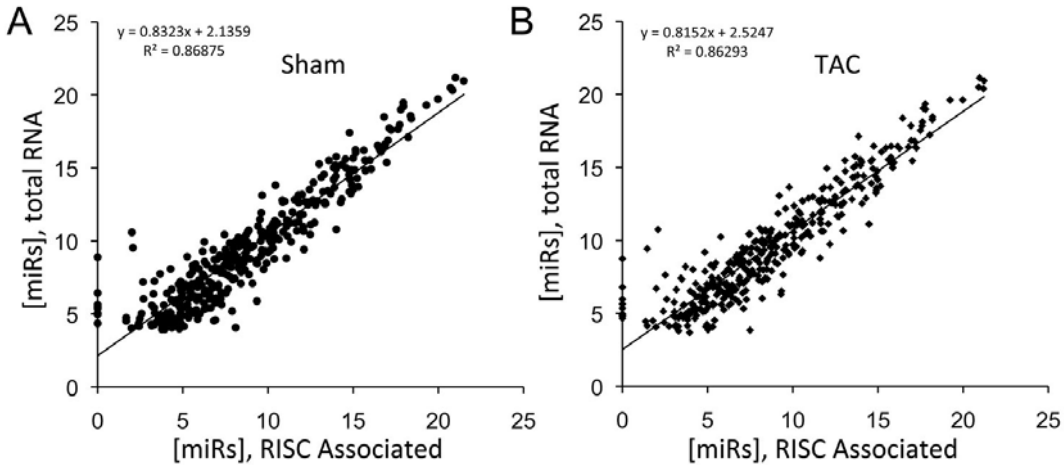

**Supplemental Figure S4.** *Correlation in microRNA abundance between total cellular and RISC-associated RNA.* **A.** Relative microRNA levels in sequencing libraries prepared from sham-operated mouse heart Argonaute-2 immunoprecipitates (RISC Associated, horizontal axis) and total cardiac RNA (vertical axis). **B.** Same as (A) for pressure overloaded (TAC) hearts.

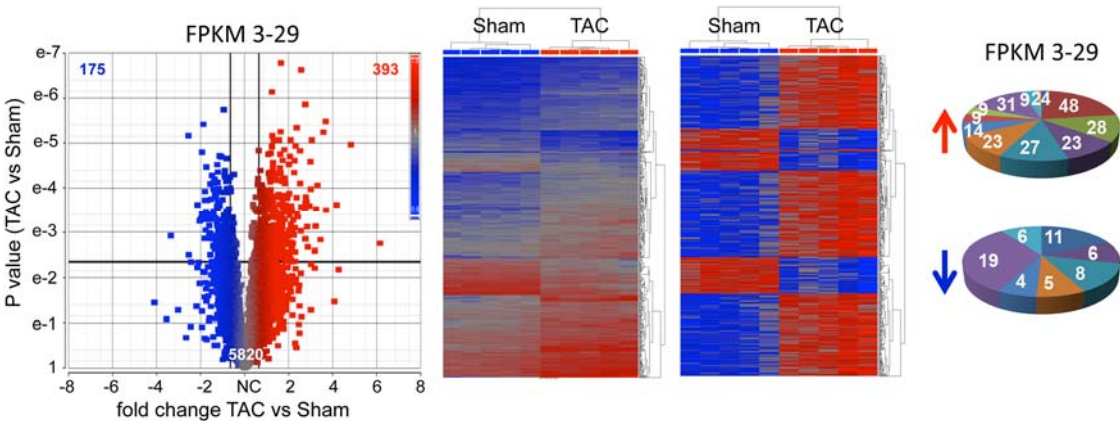

**Supplemental Figure S5.** *Transcriptional signature of the actively hypertrophying pressure-overloaded mouse heart.* Volcano plot (left) and heat maps (middle) of 5820 lower abundance cardiac mRNAs. Volcano plot shows fold-change TAC/sham vs probability value. Bold horizontal and vertical lines are threshold levels ( $\pm 25\%$  fold change and p value at false discovery rate [FDR] of 0.02). Colored numerals indicate number of up- (red) and down- (blue) regulated mRNAs. Heat maps show unsupervised hierarchical clustering of raw (left) and normalized (right) RNA-sequence data for the 568 regulated mRNAs; each column is a single mouse heart. Pie charts to the right are functional classification of upregulated (upper) and downregulated (lower) mRNAs, according to the legend in Figure 3.

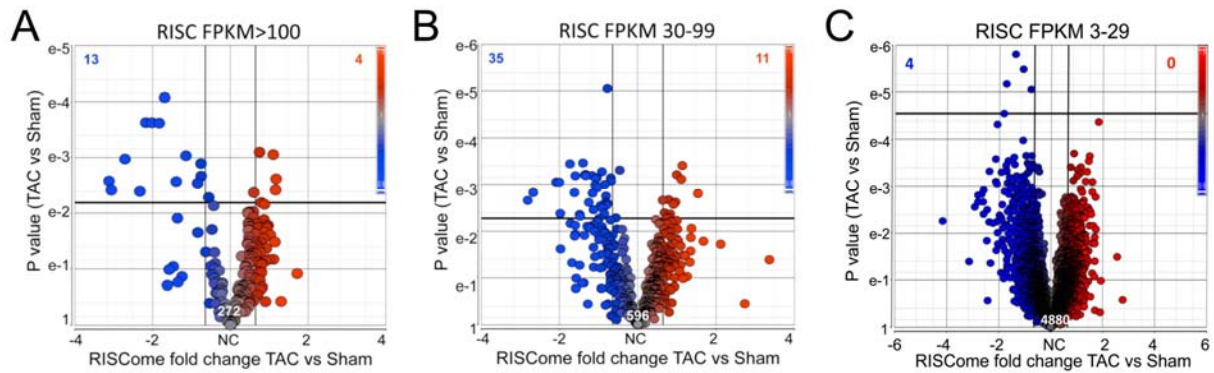

**Supplemental Figure S6.** Relationship of mRNA abundance in Argonaute 2 complexes to their stress-dependent regulation in the heart. **A-C.** Volcano plots showing fold-change TAC/sham vs probability value. Bold horizontal and vertical lines are threshold levels ( $\pm 25\%$  fold change and p value at false discovery rate [FDR] of 0.02). Colored numerals indicate number of up- (red) and down- (blue) hypertrophy-regulated highly RISC abundant (A), moderately RISC abundant (B), and low RISC abundance (C) mRNAs.

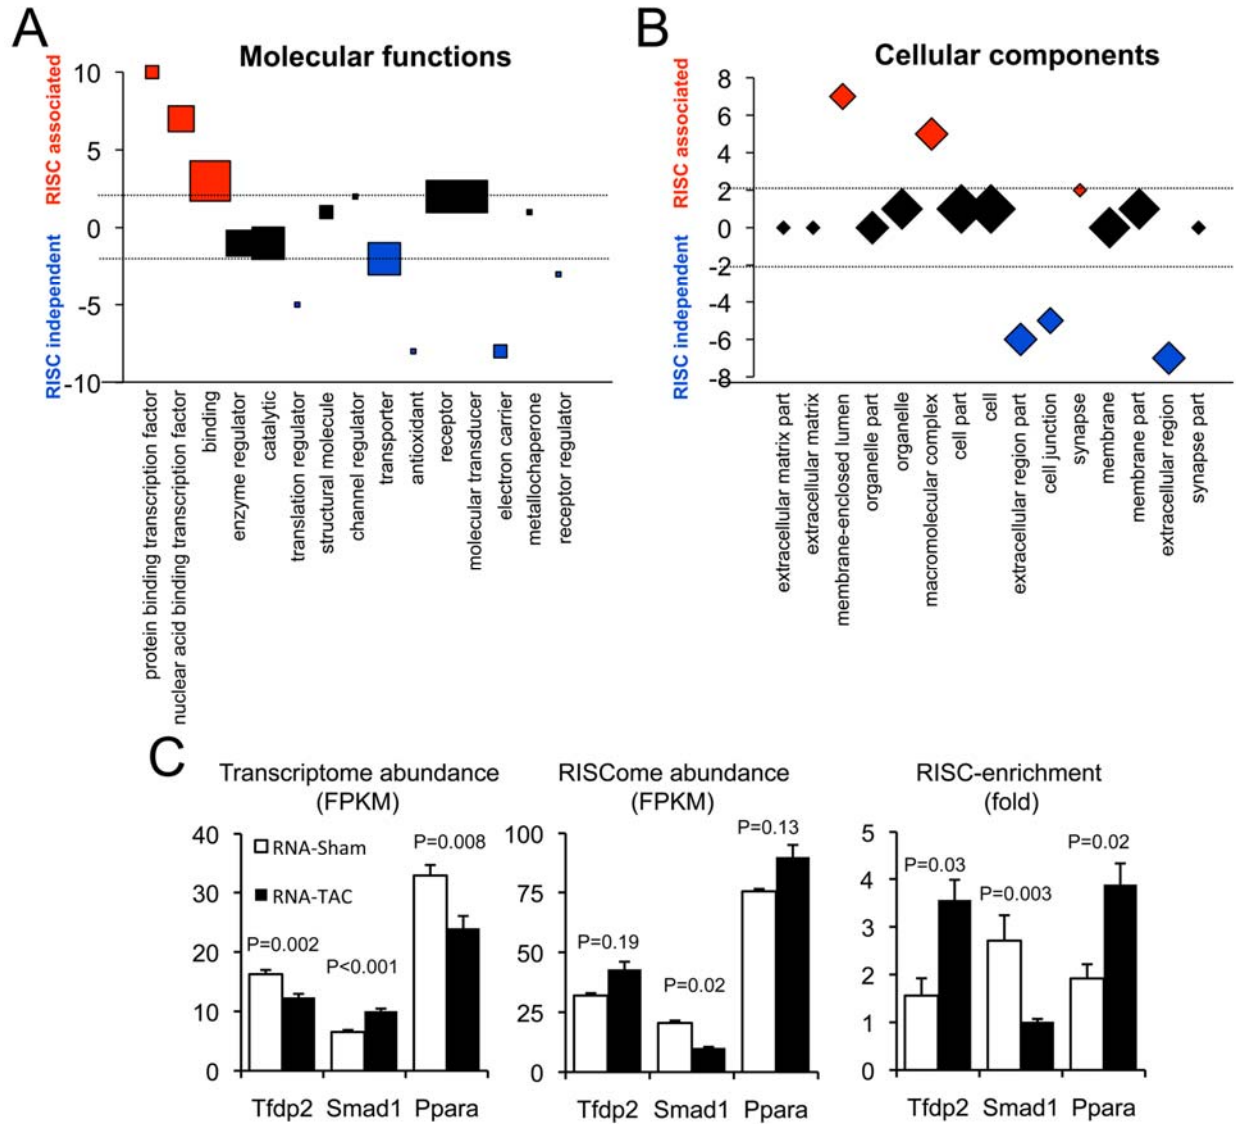

**Supplemental Figure S7.** *Distinct functions of microRNA-regulated and microRNA-independent cardiac mRNAs.* **A.** Proportional representation according to annotated molecular function of cardiac mRNAs. Categories with biased representation are depicted in red (microRNA-dependent/RISC-associated) or blue (microRNA/RISC-independent hypertrophy-regulated). **B.** As in (A), but for annotated cellular components. **C.** Comparison of transcript abundance, RISC-abundance, and RISC-enrichment for three cardiac transcription factors regulated at the protein level after TAC for transcription factors described in Figure 6b.

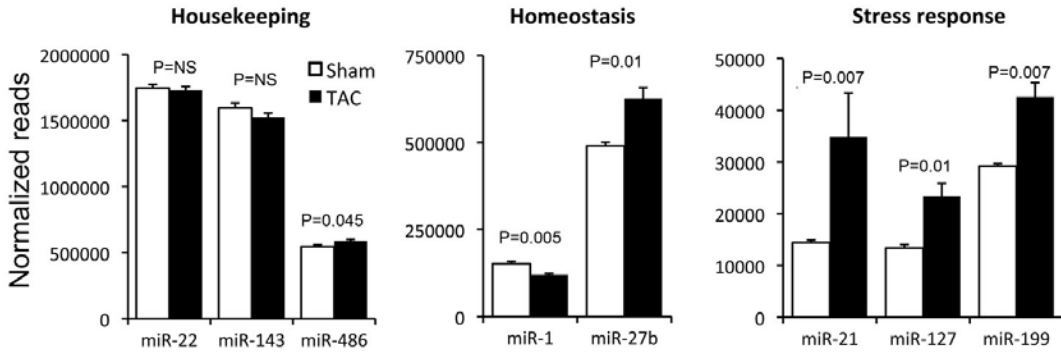

**Supplemental Figure S8.** *Expression profiles of representative housekeeping, homeostatic, and stress-response cardiac microRNAs.* Absolute expression (normalized sequencing reads) is shown for sham-operated (white) and TAC-operated (black) hearts.



**List of Supplementary Tables, Hu, et al:**

**Supplemental Table S1.** *Quantification of cardiac-expressed microRNAs in sham-operated and 1 week TAC mouse hearts.*

**Supplemental Table S2.** *Hypertrophy-regulated cardiac mRNAs, classified according to biological function.*

**Supplemental Table S3.** *RISC-enriched/microRNA-targeted cardiac mRNAs.*

**Supplemental Table S4.** *Biological functions of RISC-associated vs RISC-independent cardiac mRNAs.*

**Supplemental Table S5.** *GO categorization by biological function.*

**Supplemental Table S1. Quantification (normalized sequencing reads/10,000,000) of cardiac-expressed microRNAs in sham-operated and 1 week TAC mouse hearts, ranked by abundance in normal hearts.**

| microRNAs       | Sham<br>(mean) | Sham<br>(S.E.M.) | TAC<br>( mean ) | TAC<br>(S.E.M) | Fold change<br>(TAC /Sham) | P value   |
|-----------------|----------------|------------------|-----------------|----------------|----------------------------|-----------|
| mmu-miR-22      | 1745923        | 26213            | 1728206         | 28542          | -1.01                      | 6.598E-01 |
| mmu-miR-143     | 1596491        | 35896            | 1525470         | 31059          | -1.05                      | 1.737E-01 |
| mmu-miR-3107    | 545169         | 14209            | 585019          | 10754          | 1.07                       | 5.815E-02 |
| mmu-miR-486     | 543905         | 13990            | 586892          | 11507          | 1.08                       | 4.616E-02 |
| mmu-miR-27b     | 490601         | 9597             | 625802          | 31726          | 1.28                       | 1.074E-02 |
| mmu-miR-10a     | 427937         | 19980            | 368967          | 34474          | -1.16                      | 1.862E-01 |
| mmu-miR-30a     | 399379         | 6901             | 348205          | 8726           | -1.15                      | 2.010E-03 |
| mmu-miR-126-5p  | 391250         | 7889             | 434455          | 6208           | 1.11                       | 2.950E-03 |
| mmu-miR-26a     | 376732         | 12976            | 351652          | 1284           | -1.07                      | 1.254E-01 |
| mmu-miR-181a    | 258473         | 5144             | 243549          | 8749           | -1.06                      | 1.883E-01 |
| mmu-miR-378     | 245451         | 5624             | 275592          | 4737           | 1.12                       | 3.656E-03 |
| mmu-miR-191     | 176110         | 2339             | 191619          | 7688           | 1.09                       | 1.147E-01 |
| mmu-miR-10b     | 172632         | 35164            | 175542          | 20026          | 1.02                       | 9.449E-01 |
| mmu-miR-1       | 151714         | 6595             | 119741          | 3624           | -1.27                      | 4.979E-03 |
| mmu-miR-30d     | 126772         | 674              | 106693          | 3448           | -1.19                      | 3.697E-03 |
| mmu-miR-99b     | 120804         | 1564             | 153563          | 4104           | 1.27                       | 6.061E-04 |
| mmu-let-7f      | 119642         | 3507             | 130577          | 3468           | 1.09                       | 5.743E-02 |
| mmu-miR-148a    | 115497         | 3309             | 131549          | 3681           | 1.14                       | 1.201E-02 |
| mmu-miR-125a-5p | 70742          | 1862             | 80088           | 1814           | 1.13                       | 7.034E-03 |
| mmu-miR-16      | 63007          | 1278             | 69286           | 1485           | 1.10                       | 1.290E-02 |
| mmu-miR-125b-5p | 61070          | 794              | 68917           | 1858           | 1.13                       | 9.934E-03 |
| mmu-miR-133a    | 57751          | 871              | 59362           | 351            | 1.03                       | 1.438E-01 |
| mmu-miR-100     | 48829          | 1059             | 54041           | 2132           | 1.11                       | 7.218E-02 |
| mmu-miR-99a     | 48325          | 1182             | 50360           | 1100           | 1.04                       | 2.433E-01 |
| mmu-let-7a      | 44523          | 873              | 45429           | 1354           | 1.02                       | 5.922E-01 |
| mmu-miR-126-3p  | 42842          | 975              | 52208           | 717            | 1.22                       | 8.736E-05 |
| mmu-miR-181c    | 35049          | 815              | 31130           | 1716           | -1.13                      | 8.695E-02 |
| mmu-let-7c      | 33673          | 662              | 36732           | 1198           | 1.09                       | 6.525E-02 |
| mmu-miR-151-5p  | 33224          | 506              | 32884           | 662            | -1.01                      | 6.948E-01 |
| mmu-miR-30e     | 30633          | 592              | 24118           | 995            | -1.27                      | 1.015E-03 |
| mmu-miR-24      | 30369          | 481              | 29505           | 410            | -1.03                      | 2.100E-01 |
| mmu-miR-27a     | 29517          | 459              | 34730           | 712            | 1.18                       | 5.111E-04 |
| mmu-miR-186     | 24848          | 451              | 25044           | 767            | 1.01                       | 8.322E-01 |
| mmu-miR-192     | 23103          | 432              | 22385           | 678            | -1.03                      | 4.023E-01 |
| mmu-miR-451     | 21895          | 2295             | 19610           | 1675           | -1.12                      | 4.467E-01 |
| mmu-let-7g      | 21773          | 448              | 22625           | 622            | 1.04                       | 3.018E-01 |
| mmu-miR-151-3p  | 20333          | 815              | 28599           | 973            | 1.41                       | 2.124E-04 |

|                 |       |     |       |      |       |           |
|-----------------|-------|-----|-------|------|-------|-----------|
| mmu-miR-29a     | 20172 | 539 | 19907 | 783  | -1.01 | 7.884E-01 |
| mmu-miR-30b     | 19986 | 491 | 17757 | 807  | -1.13 | 5.236E-02 |
| mmu-let-7i      | 17952 | 280 | 25211 | 1319 | 1.40  | 4.487E-03 |
| mmu-miR-30e*    | 16448 | 212 | 15800 | 169  | -1.04 | 4.510E-02 |
| mmu-miR-499     | 14313 | 418 | 12566 | 189  | -1.14 | 1.017E-02 |
| mmu-miR-21      | 14004 | 488 | 33443 | 7989 | 2.39  | 7.161E-02 |
| mmu-miR-25      | 13592 | 468 | 15551 | 286  | 1.14  | 1.001E-02 |
| mmu-miR-127     | 13367 | 676 | 23319 | 2540 | 1.74  | 1.518E-02 |
| mmu-miR-30c     | 12949 | 289 | 11651 | 563  | -1.11 | 8.628E-02 |
| mmu-miR-199a-3p | 12911 | 210 | 18294 | 1130 | 1.42  | 8.023E-03 |
| mmu-miR-199b    | 12787 | 262 | 18250 | 1058 | 1.43  | 5.464E-03 |
| mmu-miR-23a     | 12114 | 146 | 12746 | 160  | 1.05  | 1.941E-02 |
| mmu-miR-133b    | 12088 | 170 | 10836 | 297  | -1.12 | 9.563E-03 |
| mmu-miR-208a-3p | 11906 | 331 | 10342 | 285  | -1.15 | 7.420E-03 |
| mmu-miR-26b     | 10540 | 310 | 9976  | 156  | -1.06 | 1.563E-01 |
| mmu-miR-145*    | 10266 | 222 | 9939  | 191  | -1.03 | 2.973E-01 |
| mmu-let-7d      | 9277  | 224 | 9541  | 323  | 1.03  | 5.219E-01 |
| mmu-miR-149     | 8829  | 155 | 9099  | 63   | 1.03  | 1.628E-01 |
| mmu-miR-142-5p  | 7950  | 561 | 8981  | 343  | 1.13  | 1.631E-01 |
| mmu-miR-144     | 7517  | 918 | 6818  | 320  | -1.10 | 5.043E-01 |
| mmu-miR-101a    | 7220  | 151 | 6907  | 137  | -1.05 | 1.626E-01 |
| mmu-miR-30a*    | 6256  | 113 | 5916  | 149  | -1.06 | 1.096E-01 |
| mmu-miR-181b    | 6109  | 111 | 6629  | 163  | 1.09  | 3.333E-02 |
| mmu-let-7b      | 5935  | 105 | 6439  | 204  | 1.08  | 7.046E-02 |
| mmu-miR-24-1*   | 5879  | 119 | 6726  | 196  | -1.14 | 8.431E-03 |
| mmu-miR-208b    | 5697  | 355 | 6321  | 378  | 1.11  | 2.626E-01 |
| mmu-miR-23b     | 5572  | 63  | 5345  | 65   | -1.04 | 3.630E-02 |
| mmu-miR-130a    | 5570  | 139 | 5847  | 115  | 1.05  | 1.637E-01 |
| mmu-miR-146a    | 5099  | 358 | 7642  | 371  | 1.50  | 1.144E-03 |
| mmu-miR-145     | 4850  | 141 | 4861  | 114  | 1.00  | 9.521E-01 |
| mmu-let-7d*     | 4503  | 133 | 5505  | 145  | 1.22  | 9.597E-04 |
| mmu-miR-351     | 4464  | 274 | 10484 | 573  | 2.35  | 1.024E-04 |
| mmu-miR-125b-3p | 4402  | 59  | 4941  | 222  | -1.12 | 7.118E-02 |
| mmu-miR-29c     | 4256  | 155 | 3937  | 131  | -1.08 | 1.568E-01 |
| mmu-miR-93      | 4189  | 158 | 5031  | 132  | 1.20  | 3.727E-03 |
| mmu-miR-103     | 4143  | 80  | 4916  | 117  | 1.19  | 9.020E-04 |
| mmu-miR-204     | 4096  | 145 | 4520  | 101  | 1.10  | 4.686E-02 |
| mmu-miR-195     | 3606  | 41  | 3611  | 85   | 1.00  | 9.599E-01 |
| mmu-miR-301a    | 3124  | 74  | 3744  | 111  | 1.20  | 2.390E-03 |
| mmu-miR-150     | 3097  | 142 | 3163  | 61   | 1.02  | 6.858E-01 |
| mmu-miR-199a-5p | 3085  | 54  | 5429  | 533  | 1.76  | 1.140E-02 |

|                |      |     |      |     |       |           |
|----------------|------|-----|------|-----|-------|-----------|
| mmu-miR-144*   | 3010 | 328 | 3270 | 162 | 1.09  | 5.039E-01 |
| mmu-miR-15a    | 2862 | 71  | 2920 | 10  | 1.02  | 4.618E-01 |
| mmu-miR-98     | 2709 | 107 | 2933 | 118 | 1.08  | 1.968E-01 |
| mmu-miR-181d   | 2559 | 66  | 2717 | 118 | 1.06  | 2.832E-01 |
| mmu-miR-378*   | 2465 | 64  | 2281 | 86  | -1.08 | 1.278E-01 |
| mmu-miR-322    | 2449 | 81  | 3812 | 159 | 1.56  | 2.751E-04 |
| mmu-miR-148b   | 2371 | 119 | 2199 | 87  | -1.08 | 2.794E-01 |
| mmu-miR-340-5p | 2245 | 25  | 2967 | 81  | 1.32  | 4.698E-04 |
| mmu-miR-92a    | 1998 | 112 | 2609 | 119 | 1.31  | 5.702E-03 |
| mmu-miR-30c*   | 1883 | 21  | 1884 | 40  | -1.00 | 9.889E-01 |
| mmu-let-7e     | 1721 | 65  | 2096 | 81  | 1.22  | 7.637E-03 |
| mmu-miR-411    | 1693 | 125 | 3127 | 360 | 1.85  | 1.334E-02 |
| mmu-miR-107    | 1529 | 34  | 1563 | 32  | 1.02  | 4.891E-01 |
| mmu-miR-486*   | 1529 | 27  | 1714 | 56  | 1.12  | 2.542E-02 |
| mmu-miR-28     | 1484 | 44  | 1673 | 57  | 1.13  | 3.210E-02 |
| mmu-miR-221    | 1410 | 35  | 2090 | 123 | 1.48  | 3.964E-03 |
| mmu-miR-335-3p | 1352 | 81  | 3959 | 277 | 2.93  | 3.916E-04 |
| mmu-miR-484    | 1320 | 73  | 2010 | 51  | 1.52  | 9.674E-05 |
| mmu-miR-423-3p | 1259 | 64  | 1885 | 76  | 1.50  | 2.589E-04 |
| mmu-miR-181c*  | 1200 | 52  | 1323 | 27  | 1.10  | 7.885E-02 |
| mmu-miR-423-5p | 1162 | 42  | 1453 | 56  | 1.25  | 3.826E-03 |
| mmu-miR-497    | 1140 | 36  | 1665 | 112 | 1.46  | 7.247E-03 |
| mmu-miR-29b    | 1139 | 64  | 1068 | 53  | -1.07 | 4.227E-01 |
| mmu-miR-342-3p | 1120 | 44  | 1083 | 31  | -1.03 | 5.137E-01 |
| mmu-miR-541    | 1097 | 45  | 2523 | 422 | 2.30  | 2.729E-02 |
| mmu-miR-19b    | 1093 | 68  | 1291 | 49  | 1.18  | 4.839E-02 |
| mmu-miR-15b    | 1083 | 61  | 1496 | 43  | 1.38  | 7.799E-04 |
| mmu-miR-30d*   | 1043 | 17  | 1013 | 78  | -1.03 | 7.166E-01 |
| mmu-miR-101b   | 1019 | 22  | 1025 | 37  | 1.01  | 9.090E-01 |
| mmu-miR-128    | 937  | 23  | 1290 | 92  | 1.38  | 1.699E-02 |
| mmu-miR-361    | 931  | 12  | 1050 | 43  | 1.13  | 4.831E-02 |
| mmu-miR-146b   | 926  | 61  | 1486 | 313 | 1.60  | 1.490E-01 |
| mmu-miR-1937a  | 900  | 63  | 1166 | 92  | 1.30  | 4.869E-02 |
| mmu-miR-744    | 883  | 23  | 1069 | 47  | 1.21  | 1.243E-02 |
| mmu-miR-152    | 882  | 40  | 882  | 36  | 1.00  | 9.926E-01 |
| mmu-miR-328    | 877  | 22  | 871  | 33  | -1.01 | 8.738E-01 |
| mmu-miR-1937b  | 832  | 43  | 1046 | 86  | 1.26  | 6.888E-02 |
| mmu-miR-335-5p | 807  | 61  | 1127 | 68  | 1.40  | 8.420E-03 |
| mmu-miR-22*    | 784  | 21  | 777  | 32  | -1.01 | 8.628E-01 |
| mmu-miR-532-5p | 779  | 21  | 1154 | 70  | 1.48  | 4.205E-03 |
| mmu-miR-338-3p | 735  | 20  | 621  | 28  | -1.18 | 1.131E-02 |

|                 |     |    |      |     |       |           |
|-----------------|-----|----|------|-----|-------|-----------|
| mmu-miR-194     | 710 | 30 | 651  | 16  | -1.09 | 1.330E-01 |
| mmu-miR-501-3p  | 710 | 16 | 1002 | 82  | 1.41  | 2.209E-02 |
| mmu-miR-208a-5p | 691 | 26 | 694  | 24  | 1.00  | 9.454E-01 |
| mmu-miR-106b    | 687 | 31 | 716  | 15  | 1.04  | 4.279E-01 |
| mmu-miR-181a*   | 683 | 18 | 777  | 33  | 1.14  | 4.371E-02 |
| mmu-miR-203     | 651 | 29 | 742  | 45  | 1.14  | 1.291E-01 |
| mmu-miR-450a    | 631 | 20 | 651  | 28  | 1.03  | 5.762E-01 |
| mmu-miR-320     | 629 | 15 | 745  | 35  | 1.19  | 2.649E-02 |
| mmu-miR-20a     | 616 | 25 | 648  | 11  | 1.05  | 2.810E-01 |
| mmu-miR-148a*   | 589 | 23 | 693  | 56  | 1.18  | 1.443E-01 |
| mmu-miR-152*    | 576 | 7  | 793  | 24  | 1.38  | 4.315E-04 |
| mmu-miR-425     | 534 | 15 | 684  | 45  | 1.28  | 2.572E-02 |
| mmu-miR-132     | 531 | 23 | 861  | 44  | 1.62  | 5.670E-04 |
| mmu-miR-674*    | 516 | 29 | 707  | 38  | 1.37  | 4.606E-03 |
| mmu-miR-223     | 501 | 33 | 954  | 126 | 1.90  | 2.077E-02 |
| mmu-miR-1843-5p | 496 | 6  | 502  | 25  | 1.01  | 8.218E-01 |
| mmu-miR-139-5p  | 480 | 14 | 435  | 11  | -1.10 | 3.686E-02 |
| mmu-miR-582-5p  | 470 | 21 | 367  | 15  | -1.28 | 5.140E-03 |
| mmu-miR-185     | 445 | 23 | 382  | 12  | -1.16 | 5.152E-02 |
| mmu-miR-21*     | 429 | 15 | 1425 | 501 | 3.32  | 1.178E-01 |
| mmu-miR-140*    | 427 | 10 | 520  | 36  | 1.22  | 6.237E-02 |
| mmu-miR-199b*   | 406 | 21 | 607  | 39  | 1.50  | 3.552E-03 |
| mmu-miR-214     | 400 | 14 | 827  | 71  | 2.07  | 3.174E-03 |
| mmu-miR-322*    | 376 | 14 | 527  | 44  | 1.40  | 2.277E-02 |
| mmu-miR-1944    | 368 | 8  | 424  | 11  | 1.15  | 3.944E-03 |
| mmu-miR-361*    | 353 | 3  | 422  | 24  | 1.19  | 4.367E-02 |
| mmu-miR-434-3p  | 343 | 13 | 544  | 37  | 1.59  | 3.615E-03 |
| mmu-miR-3057-5p | 343 | 18 | 366  | 20  | 1.07  | 4.130E-01 |
| mmu-miR-574-3p  | 340 | 27 | 532  | 6   | 1.57  | 1.700E-03 |
| mmu-let-7i*     | 335 | 5  | 320  | 14  | -1.05 | 3.510E-01 |
| mmu-miR-676     | 322 | 10 | 438  | 13  | 1.36  | 1.194E-04 |
| mmu-miR-381     | 306 | 7  | 463  | 60  | 1.52  | 5.868E-02 |
| mmu-miR-410     | 306 | 28 | 664  | 105 | 2.17  | 2.422E-02 |
| mmu-miR-28*     | 303 | 19 | 382  | 14  | 1.26  | 1.068E-02 |
| mmu-miR-34c     | 294 | 12 | 980  | 279 | 3.33  | 7.004E-02 |
| mmu-miR-17      | 293 | 14 | 362  | 29  | 1.24  | 7.382E-02 |
| mmu-miR-1943    | 292 | 12 | 292  | 8   | -1.00 | 9.816E-01 |
| mmu-miR-374     | 290 | 21 | 282  | 18  | -1.03 | 7.683E-01 |
| mmu-miR-421     | 290 | 9  | 377  | 11  | 1.30  | 2.769E-04 |
| mmu-miR-212-5p  | 289 | 16 | 500  | 47  | 1.73  | 8.702E-03 |
| mmu-miR-106b*   | 288 | 18 | 324  | 5   | 1.12  | 1.175E-01 |

|                 |     |    |     |    |       |           |
|-----------------|-----|----|-----|----|-------|-----------|
| mmu-miR-490-3p  | 285 | 21 | 319 | 26 | 1.12  | 3.384E-01 |
| mmu-miR-1839-5p | 280 | 21 | 308 | 12 | 1.10  | 2.941E-01 |
| mmu-miR-32      | 279 | 11 | 260 | 21 | -1.07 | 4.603E-01 |
| mmu-miR-31      | 279 | 12 | 401 | 22 | 1.44  | 2.578E-03 |
| mmu-miR-221*    | 274 | 9  | 555 | 54 | 2.02  | 5.960E-03 |
| mmu-miR-136     | 273 | 8  | 297 | 12 | 1.09  | 1.367E-01 |
| mmu-miR-499*    | 272 | 8  | 234 | 6  | -1.16 | 5.596E-03 |
| mmu-miR-1249    | 253 | 4  | 229 | 17 | -1.10 | 2.376E-01 |
| mmu-let-7b*     | 248 | 9  | 326 | 15 | 1.32  | 3.071E-03 |
| mmu-miR-339-5p  | 242 | 7  | 271 | 18 | 1.12  | 1.939E-01 |
| mmu-miR-27b*    | 241 | 20 | 356 | 10 | 1.48  | 2.299E-03 |
| mmu-miR-210     | 240 | 13 | 289 | 17 | 1.20  | 5.064E-02 |
| mmu-miR-142-3p  | 239 | 12 | 317 | 18 | 1.33  | 8.946E-03 |
| mmu-miR-148b*   | 229 | 6  | 280 | 12 | 1.22  | 9.920E-03 |
| mmu-miR-182     | 228 | 6  | 286 | 18 | 1.26  | 2.832E-02 |
| mmu-miR-434-5p  | 204 | 16 | 460 | 58 | 2.26  | 9.646E-03 |
| mmu-miR-324-5p  | 202 | 14 | 233 | 7  | 1.15  | 9.637E-02 |
| mmu-let-7c-2*   | 202 | 8  | 227 | 17 | 1.13  | 2.363E-01 |
| mmu-miR-720     | 194 | 19 | 139 | 10 | -1.39 | 4.239E-02 |
| mmu-miR-365     | 190 | 4  | 225 | 9  | 1.18  | 1.668E-02 |
| mmu-miR-214*    | 189 | 9  | 322 | 25 | 1.71  | 4.273E-03 |
| mmu-miR-15b*    | 188 | 9  | 251 | 12 | 1.34  | 3.552E-03 |
| mmu-let-7a-1*   | 181 | 6  | 209 | 12 | 1.16  | 7.322E-02 |
| mmu-miR-218     | 179 | 8  | 155 | 10 | -1.15 | 1.195E-01 |
| mmu-miR-379     | 178 | 14 | 300 | 42 | 1.68  | 4.131E-02 |
| mmu-miR-331-3p  | 176 | 5  | 222 | 12 | 1.26  | 1.601E-02 |
| mmu-miR-1196    | 175 | 13 | 189 | 10 | 1.08  | 4.547E-01 |
| mmu-miR-872*    | 174 | 7  | 204 | 9  | 1.17  | 3.271E-02 |
| mmu-miR-26b*    | 170 | 11 | 179 | 11 | 1.05  | 5.721E-01 |
| mmu-miR-193b    | 168 | 7  | 231 | 17 | 1.38  | 1.694E-02 |
| mmu-miR-3068*   | 161 | 8  | 159 | 11 | -1.01 | 8.707E-01 |
| mmu-miR-300     | 158 | 8  | 278 | 35 | 1.75  | 2.594E-02 |
| mmu-miR-215     | 157 | 16 | 189 | 27 | 1.20  | 3.547E-01 |
| mmu-miR-184     | 155 | 8  | 377 | 35 | 2.44  | 2.571E-03 |
| mmu-miR-676*    | 154 | 11 | 122 | 8  | -1.27 | 4.432E-02 |
| mmu-miR-664     | 146 | 5  | 140 | 4  | -1.05 | 3.672E-01 |
| mmu-miR-652     | 141 | 3  | 161 | 15 | 1.14  | 2.608E-01 |
| mmu-miR-3102    | 133 | 6  | 120 | 13 | -1.11 | 4.139E-01 |
| mmu-miR-19a     | 128 | 6  | 180 | 14 | 1.40  | 1.677E-02 |
| mmu-miR-1947    | 127 | 8  | 114 | 9  | -1.12 | 2.963E-01 |
| mmu-miR-191*    | 126 | 7  | 138 | 8  | 1.09  | 2.961E-01 |

|                 |     |    |     |    |       |           |
|-----------------|-----|----|-----|----|-------|-----------|
| mmu-miR-195*    | 123 | 12 | 165 | 10 | 1.35  | 2.739E-02 |
| mmu-miR-212-3p  | 122 | 17 | 268 | 26 | 2.19  | 2.333E-03 |
| mmu-miR-153     | 121 | 7  | 138 | 23 | 1.14  | 5.009E-01 |
| mmu-miR-98*     | 120 | 8  | 165 | 16 | 1.38  | 4.609E-02 |
| mmu-miR-30b*    | 119 | 8  | 96  | 8  | -1.23 | 7.012E-02 |
| mmu-miR-3107*   | 119 | 8  | 134 | 8  | 1.13  | 2.008E-01 |
| mmu-miR-345-5p  | 113 | 11 | 113 | 8  | -1.00 | 9.974E-01 |
| mmu-miR-27a*    | 111 | 8  | 135 | 18 | 1.22  | 2.815E-01 |
| mmu-miR-671-3p  | 108 | 4  | 239 | 27 | 2.22  | 7.567E-03 |
| mmu-miR-190     | 105 | 6  | 91  | 5  | -1.15 | 1.193E-01 |
| mmu-miR-574-5p  | 97  | 8  | 103 | 3  | 1.06  | 5.240E-01 |
| mmu-miR-744*    | 92  | 7  | 94  | 8  | 1.02  | 8.467E-01 |
| mmu-miR-1839-3p | 87  | 6  | 79  | 8  | -1.10 | 4.250E-01 |
| mmu-miR-339-3p  | 86  | 6  | 92  | 7  | 1.07  | 5.217E-01 |
| mmu-miR-16-2*   | 85  | 8  | 75  | 4  | -1.13 | 2.858E-01 |
| mmu-miR-92b     | 85  | 7  | 124 | 10 | 1.46  | 1.441E-02 |
| mmu-miR-34a     | 85  | 9  | 116 | 16 | 1.37  | 1.307E-01 |
| mmu-miR-674     | 84  | 5  | 79  | 5  | -1.06 | 4.786E-01 |
| mmu-miR-10a*    | 80  | 4  | 61  | 9  | -1.31 | 9.999E-02 |
| mmu-miR-101a*   | 80  | 6  | 81  | 5  | 1.01  | 9.415E-01 |
| mmu-miR-29a*    | 79  | 7  | 62  | 12 | -1.28 | 2.630E-01 |
| mmu-miR-3068    | 79  | 6  | 61  | 4  | -1.31 | 3.574E-02 |
| mmu-miR-1964-3p | 79  | 4  | 81  | 6  | 1.03  | 6.926E-01 |
| mmu-miR-409-3p  | 79  | 7  | 178 | 30 | 2.26  | 2.794E-02 |
| mmu-miR-362-3p  | 78  | 4  | 75  | 5  | -1.05 | 5.980E-01 |
| mmu-miR-455*    | 78  | 6  | 120 | 10 | 1.53  | 1.005E-02 |
| mmu-miR-542-3p  | 78  | 6  | 103 | 4  | 1.33  | 6.820E-03 |
| mmu-miR-350     | 73  | 4  | 68  | 4  | -1.07 | 3.781E-01 |
| mmu-miR-542-5p  | 71  | 7  | 49  | 6  | -1.44 | 4.807E-02 |
| mmu-miR-504     | 70  | 6  | 84  | 10 | 1.19  | 2.810E-01 |
| mmu-miR-3074-5p | 67  | 3  | 85  | 6  | 1.27  | 4.558E-02 |
| mmu-miR-1-1*    | 65  | 8  | 54  | 4  | -1.20 | 2.954E-01 |
| mmu-miR-136*    | 63  | 8  | 88  | 13 | 1.40  | 1.450E-01 |
| mmu-miR-29c*    | 63  | 4  | 59  | 4  | -1.06 | 4.900E-01 |
| mmu-miR-3096-3p | 62  | 4  | 70  | 8  | 1.12  | 4.065E-01 |
| mmu-miR-15a*    | 62  | 9  | 68  | 8  | 1.10  | 6.174E-01 |
| mmu-miR-2145    | 61  | 12 | 31  | 6  | -1.97 | 6.766E-02 |
| mmu-miR-130b    | 59  | 6  | 112 | 5  | 1.91  | 1.244E-04 |
| mmu-miR-298     | 59  | 3  | 195 | 37 | 3.33  | 2.119E-02 |
| mmu-miR-450b-5p | 58  | 6  | 93  | 7  | 1.58  | 4.682E-03 |
| mmu-miR-201     | 58  | 7  | 64  | 7  | 1.10  | 5.642E-01 |

|                 |    |   |     |    |       |           |
|-----------------|----|---|-----|----|-------|-----------|
| mmu-miR-345-3p  | 58 | 7 | 67  | 4  | 1.17  | 2.639E-01 |
| mmu-miR-7a-1*   | 57 | 4 | 60  | 7  | 1.06  | 7.133E-01 |
| mmu-miR-92a-1*  | 55 | 5 | 84  | 7  | 1.53  | 1.054E-02 |
| mmu-miR-33      | 55 | 5 | 48  | 6  | -1.15 | 3.961E-01 |
| mmu-miR-210*    | 53 | 3 | 68  | 5  | 1.27  | 6.051E-02 |
| mmu-miR-99a*    | 53 | 5 | 56  | 5  | 1.06  | 7.086E-01 |
| mmu-miR-409-5p  | 52 | 7 | 127 | 22 | 2.45  | 2.570E-02 |
| mmu-miR-431     | 50 | 6 | 125 | 19 | 2.47  | 1.448E-02 |
| mmu-let-7c-1*   | 50 | 5 | 66  | 3  | 1.32  | 2.957E-02 |
| mmu-miR-500     | 50 | 8 | 45  | 6  | -1.12 | 6.052E-01 |
| mmu-miR-222     | 50 | 2 | 63  | 9  | 1.27  | 2.091E-01 |
| mmu-miR-874     | 49 | 3 | 49  | 6  | -1.00 | 9.906E-01 |
| mmu-miR-1198-5p | 49 | 5 | 71  | 3  | 1.45  | 7.319E-03 |
| mmu-let-7f-1*   | 48 | 6 | 62  | 5  | 1.27  | 1.424E-01 |
| mmu-miR-330     | 48 | 1 | 45  | 3  | -1.08 | 3.894E-01 |
| mmu-miR-700     | 44 | 4 | 51  | 4  | 1.14  | 3.374E-01 |
| mmu-miR-673-5p  | 44 | 6 | 72  | 9  | 1.61  | 4.241E-02 |
| mmu-miR-700*    | 43 | 4 | 32  | 4  | -1.34 | 8.472E-02 |
| mmu-miR-871-3p  | 43 | 9 | 30  | 10 | -1.42 | 3.760E-01 |
| mmu-miR-340-3p  | 41 | 4 | 39  | 4  | -1.04 | 7.892E-01 |
| mmu-miR-200a    | 41 | 7 | 33  | 6  | -1.25 | 3.859E-01 |
| mmu-miR-17*     | 40 | 4 | 40  | 5  | 1.00  | 9.790E-01 |
| mmu-miR-1983    | 39 | 3 | 64  | 10 | 1.65  | 7.041E-02 |
| mmu-miR-18a     | 38 | 6 | 53  | 4  | 1.41  | 7.060E-02 |
| mmu-miR-125a-3p | 37 | 1 | 56  | 2  | 1.50  | 9.997E-05 |
| mmu-miR-138     | 37 | 4 | 33  | 4  | -1.11 | 5.198E-01 |
| mmu-miR-3082-3p | 36 | 4 | 50  | 8  | 1.40  | 1.730E-01 |
| mmu-miR-490-5p  | 36 | 4 | 40  | 6  | 1.11  | 5.901E-01 |
| mmu-miR-503*    | 35 | 5 | 46  | 6  | 1.32  | 1.978E-01 |
| mmu-miR-326     | 34 | 4 | 64  | 12 | 1.88  | 6.845E-02 |
| mmu-miR-7a      | 34 | 3 | 49  | 5  | 1.45  | 3.237E-02 |
| mmu-miR-429     | 34 | 5 | 46  | 5  | 1.36  | 1.482E-01 |
| mmu-miR-183     | 34 | 4 | 33  | 4  | -1.01 | 9.344E-01 |
| mmu-let-7e*     | 33 | 2 | 44  | 8  | 1.34  | 2.367E-01 |
| mmu-miR-1981    | 32 | 6 | 36  | 5  | 1.10  | 6.835E-01 |
| mmu-miR-547     | 32 | 3 | 32  | 4  | 1.01  | 9.767E-01 |
| mmu-miR-1960    | 31 | 5 | 32  | 6  | 1.06  | 8.366E-01 |
| mmu-miR-362-5p  | 30 | 5 | 38  | 4  | 1.25  | 2.616E-01 |
| mmu-miR-511-3p  | 30 | 3 | 53  | 10 | 1.78  | 8.492E-02 |
| mmu-miR-26a*    | 30 | 5 | 41  | 6  | 1.39  | 1.552E-01 |
| mmu-miR-3098-5p | 29 | 5 | 15  | 4  | -1.91 | 5.475E-02 |



|                 |    |   |    |    |       |           |
|-----------------|----|---|----|----|-------|-----------|
| mmu-miR-133a*   | 29 | 4 | 37 | 3  | 1.27  | 1.264E-01 |
| mmu-miR-3061-3p | 28 | 1 | 40 | 3  | 1.44  | 1.752E-02 |
| mmu-miR-411*    | 28 | 4 | 66 | 6  | 2.35  | 1.000E-03 |
| mmu-let-7g*     | 27 | 3 | 31 | 1  | 1.12  | 3.453E-01 |
| mmu-miR-532-3p  | 27 | 5 | 36 | 4  | 1.32  | 2.107E-01 |
| mmu-miR-3071    | 27 | 3 | 16 | 2  | -1.65 | 1.326E-02 |
| mmu-miR-338-5p  | 27 | 3 | 32 | 5  | 1.20  | 4.108E-01 |
| mmu-miR-132*    | 27 | 5 | 46 | 4  | 1.71  | 1.751E-02 |
| mmu-miR-1843-3p | 26 | 3 | 26 | 5  | -1.01 | 9.540E-01 |
| mmu-miR-128*    | 26 | 4 | 29 | 5  | 1.12  | 6.661E-01 |
| mmu-miR-488     | 25 | 4 | 29 | 6  | 1.16  | 5.888E-01 |
| mmu-miR-449a    | 24 | 2 | 34 | 3  | 1.44  | 1.844E-02 |
| mmu-miR-190*    | 23 | 3 | 18 | 1  | -1.33 | 1.201E-01 |
| mmu-miR-200c    | 23 | 2 | 20 | 3  | -1.15 | 4.227E-01 |
| mmu-miR-130b*   | 23 | 5 | 55 | 13 | 2.37  | 6.774E-02 |
| mmu-miR-16-1*   | 23 | 3 | 20 | 2  | -1.14 | 4.547E-01 |
| mmu-miR-134     | 23 | 2 | 54 | 8  | 2.32  | 1.809E-02 |
| mmu-miR-187     | 23 | 3 | 38 | 5  | 1.67  | 2.800E-02 |
| mmu-miR-1981*   | 23 | 2 | 31 | 7  | 1.35  | 3.184E-01 |
| mmu-miR-1959    | 22 | 4 | 13 | 2  | -1.67 | 1.140E-01 |
| mmu-miR-467d    | 21 | 2 | 26 | 2  | 1.20  | 1.871E-01 |
| mmu-miR-708*    | 21 | 2 | 16 | 4  | -1.33 | 2.815E-01 |
| mmu-miR-341     | 21 | 3 | 63 | 17 | 3.02  | 7.126E-02 |
| mmu-miR-1933-3p | 21 | 2 | 23 | 4  | 1.14  | 5.341E-01 |
| mmu-miR-154     | 20 | 3 | 23 | 2  | 1.14  | 5.112E-01 |
| mmu-miR-200b    | 19 | 4 | 19 | 3  | 1.02  | 9.338E-01 |
| mmu-miR-3084    | 19 | 4 | 13 | 1  | -1.47 | 2.475E-01 |
| mmu-miR-874*    | 19 | 1 | 18 | 2  | -1.06 | 7.069E-01 |
| mmu-miR-369-3p  | 18 | 2 | 23 | 3  | 1.22  | 3.214E-01 |
| mmu-miR-470     | 18 | 3 | 16 | 5  | -1.19 | 6.186E-01 |
| mmu-miR-540-5p  | 18 | 3 | 18 | 2  | 1.03  | 9.017E-01 |
| mmu-miR-296-5p  | 18 | 2 | 18 | 0  | 1.00  | 9.722E-01 |
| mmu-miR-99b*    | 18 | 4 | 35 | 6  | 1.98  | 5.554E-02 |
| mmu-miR-433     | 17 | 1 | 39 | 3  | 2.23  | 2.755E-04 |
| mmu-miR-185*    | 17 | 2 | 23 | 3  | 1.35  | 1.358E-01 |
| mmu-miR-299     | 17 | 2 | 39 | 8  | 2.32  | 4.405E-02 |
| mmu-miR-193     | 16 | 1 | 21 | 3  | 1.27  | 1.669E-01 |
| mmu-miR-369-5p  | 16 | 4 | 34 | 3  | 2.11  | 7.264E-03 |
| mmu-miR-376b*   | 16 | 2 | 16 | 2  | -1.02 | 8.986E-01 |
| mmu-miR-467a    | 15 | 3 | 21 | 4  | 1.37  | 3.064E-01 |
| mmu-miR-143*    | 15 | 2 | 24 | 1  | 1.60  | 3.048E-03 |

|                 |    |   |    |    |       |           |
|-----------------|----|---|----|----|-------|-----------|
| mmu-miR-337-3p  | 15 | 3 | 19 | 3  | 1.24  | 4.580E-01 |
| mmu-miR-467e    | 15 | 3 | 16 | 3  | 1.05  | 8.489E-01 |
| mmu-miR-376c    | 15 | 2 | 27 | 7  | 1.77  | 1.810E-01 |
| mmu-miR-425*    | 15 | 2 | 14 | 3  | -1.03 | 9.100E-01 |
| mmu-miR-29b*    | 14 | 2 | 15 | 3  | 1.10  | 7.369E-01 |
| mmu-miR-379*    | 14 | 3 | 34 | 7  | 2.47  | 3.228E-02 |
| mmu-miR-222*    | 13 | 3 | 14 | 2  | 1.11  | 7.065E-01 |
| mmu-miR-3074-3p | 12 | 3 | 11 | 3  | -1.16 | 6.623E-01 |
| mmu-miR-196b    | 12 | 2 | 15 | 2  | 1.22  | 3.491E-01 |
| mmu-miR-18a*    | 12 | 1 | 20 | 3  | 1.64  | 9.248E-02 |
| mmu-miR-1191    | 12 | 2 | 10 | 2  | -1.21 | 4.568E-01 |
| mmu-miR-708     | 12 | 2 | 15 | 2  | 1.30  | 1.763E-01 |
| mmu-miR-3061-5p | 11 | 2 | 10 | 2  | -1.08 | 7.935E-01 |
| mmu-miR-3065*   | 11 | 2 | 11 | 1  | -1.01 | 9.530E-01 |
| mmu-miR-1247    | 11 | 3 | 25 | 15 | 2.27  | 4.129E-01 |
| mmu-miR-31*     | 11 | 2 | 19 | 3  | 1.80  | 6.108E-02 |
| mmu-miR-668     | 10 | 2 | 29 | 3  | 2.82  | 2.361E-03 |
| mmu-miR-666-5p  | 10 | 2 | 19 | 6  | 1.83  | 2.056E-01 |
| mmu-let-7f-2*   | 10 | 3 | 19 | 4  | 1.88  | 8.528E-02 |
| mmu-miR-669a-5p | 10 | 1 | 9  | 2  | -1.18 | 4.146E-01 |
| mmu-miR-1-2*    | 10 | 3 | 4  | 1  | -2.64 | 7.523E-02 |
| mmu-miR-219*    | 10 | 4 | 25 | 4  | 2.51  | 1.883E-02 |
| mmu-miR-9*      | 10 | 1 | 16 | 2  | 1.65  | 3.570E-02 |
| mmu-miR-34b-5p  | 10 | 1 | 36 | 18 | 3.81  | 2.039E-01 |
| mmu-miR-669a-3p | 9  | 1 | 11 | 1  | 1.13  | 5.714E-01 |
| mmu-miR-669o-3p | 9  | 1 | 12 | 2  | 1.28  | 2.229E-01 |
| mmu-miR-330*    | 9  | 3 | 11 | 2  | 1.18  | 6.747E-01 |
| mmu-miR-673-3p  | 9  | 1 | 9  | 1  | 1.07  | 7.519E-01 |
| mmu-miR-34b-3p  | 8  | 1 | 20 | 6  | 2.43  | 1.032E-01 |
| mmu-miR-329*    | 8  | 3 | 15 | 4  | 1.77  | 2.026E-01 |
| mmu-miR-299*    | 8  | 3 | 22 | 6  | 2.70  | 8.624E-02 |
| mmu-miR-455     | 8  | 1 | 14 | 1  | 1.82  | 3.689E-03 |
| mmu-miR-690     | 8  | 1 | 3  | 1  | -2.45 | 1.393E-02 |
| mmu-miR-129-5p  | 8  | 1 | 5  | 2  | -1.48 | 2.563E-01 |
| mmu-miR-382     | 8  | 2 | 10 | 3  | 1.36  | 4.428E-01 |
| mmu-miR-1949    | 8  | 1 | 6  | 1  | -1.26 | 3.508E-01 |
| mmu-miR-664*    | 8  | 1 | 8  | 1  | -1.01 | 9.711E-01 |
| mmu-miR-669p    | 7  | 2 | 9  | 1  | 1.24  | 4.370E-01 |
| mmu-miR-130a*   | 7  | 2 | 8  | 2  | 1.06  | 8.759E-01 |
| mmu-miR-149*    | 7  | 0 | 7  | 2  | -1.04 | 9.076E-01 |
| mmu-miR-741     | 7  | 1 | 4  | 1  | -1.87 | 5.688E-02 |

|              |   |   |   |   |       |           |
|--------------|---|---|---|---|-------|-----------|
| mmu-miR-1199 | 6 | 1 | 5 | 1 | -1.12 | 6.964E-01 |
|--------------|---|---|---|---|-------|-----------|

**Supplemental Table S2. Hypertrophy-regulated cardiac mRNAs, classified according to biological function.**

| Function          | Up-regulated after TAC |                        |          | Down-regulated after TAC |                        |          |
|-------------------|------------------------|------------------------|----------|--------------------------|------------------------|----------|
|                   | mRNA name              | Fold change (TAC-Sham) | P-value  | mRNA name                | Fold change (TAC-Sham) | P-value  |
| <b>Metabolism</b> |                        |                        |          |                          |                        |          |
|                   | ARRB2                  | 1.97                   | 6.06E-03 | ALDH2                    | -1.29                  | 8.58E-03 |
|                   | ASAP2                  | 1.46                   | 4.68E-03 | BCKDHA                   | -1.63                  | 1.27E-04 |
|                   | GPSM3                  | 1.54                   | 2.79E-02 | EGLN1                    | -1.40                  | 1.84E-04 |
|                   | PREX1                  | 2.18                   | 5.15E-04 | ETFA                     | -1.51                  | 3.66E-03 |
|                   | RASGRP3                | 1.27                   | 2.15E-02 | HSD17B10                 | -1.38                  | 5.64E-05 |
|                   | SHC1                   | 1.32                   | 6.18E-03 | IDH3A                    | -1.39                  | 2.59E-03 |
|                   |                        |                        |          | NDUFS4                   | -1.37                  | 4.65E-03 |
|                   |                        |                        |          | ACADS                    | -1.38                  | 2.63E-04 |
|                   |                        |                        |          | DCI                      | -1.59                  | 3.06E-04 |
|                   |                        |                        |          | IVD                      | -1.57                  | 9.15E-04 |
|                   |                        |                        |          | NNT                      | -1.45                  | 2.22E-03 |
|                   |                        |                        |          | ART3                     | -2.02                  | 5.62E-05 |
|                   |                        |                        |          | CPT1B                    | -1.33                  | 3.66E-03 |
|                   |                        |                        |          | CS                       | -1.31                  | 6.54E-04 |
|                   |                        |                        |          | HADHB                    | -1.49                  | 1.15E-03 |
|                   |                        |                        |          | PFKM                     | -1.33                  | 5.23E-03 |
|                   |                        |                        |          | PINK1                    | -1.53                  | 5.17E-04 |
|                   |                        |                        |          | ACADVL                   | -1.45                  | 1.61E-03 |
|                   |                        |                        |          | ATP1A1                   | -1.30                  | 2.29E-03 |
|                   |                        |                        |          | ATP5O                    | -1.33                  | 1.24E-03 |
|                   |                        |                        |          | CRAT                     | -1.48                  | 1.50E-04 |
|                   |                        |                        |          | ECH1                     | -1.91                  | 2.37E-05 |
|                   |                        |                        |          | ECHS1                    | -1.35                  | 1.51E-04 |
|                   |                        |                        |          | ETFB                     | -1.44                  | 1.08E-03 |
|                   |                        |                        |          | ETFDH                    | -1.48                  | 2.83E-03 |
|                   |                        |                        |          | GOT1                     | -1.53                  | 2.73E-04 |
|                   |                        |                        |          | HADHA                    | -1.55                  | 1.54E-04 |
|                   |                        |                        |          | IDH3G                    | -1.38                  | 6.15E-04 |
|                   |                        |                        |          | LDHB                     | -1.42                  | 3.00E-04 |
|                   |                        |                        |          | NDUFA1                   | -1.38                  | 1.19E-03 |
|                   |                        |                        |          | NDUFA8                   | -1.30                  | 2.21E-03 |
|                   |                        |                        |          | NDUFB10                  | -1.32                  | 2.00E-04 |
|                   |                        |                        |          | ATP2A2                   | -1.39                  | 3.18E-03 |
|                   |                        |                        |          | ATP5A1                   | -1.33                  | 2.42E-03 |
|                   |                        |                        |          | ATP5E                    | -1.31                  | 4.86E-03 |
|                   |                        |                        |          | ATP5J                    | -1.29                  | 2.76E-02 |

|  |  |  |  |         |       |          |
|--|--|--|--|---------|-------|----------|
|  |  |  |  | COX4I1  | -1.32 | 5.98E-04 |
|  |  |  |  | COX7A1  | -1.52 | 3.83E-04 |
|  |  |  |  | COX7C   | -1.33 | 1.01E-04 |
|  |  |  |  | COX8B   | -1.42 | 2.34E-05 |
|  |  |  |  | IDH2    | -1.57 | 4.13E-06 |
|  |  |  |  | MDH1    | -1.37 | 9.31E-04 |
|  |  |  |  | NDUFA5  | -1.31 | 1.16E-03 |
|  |  |  |  | NDUFV3  | -1.30 | 1.19E-03 |
|  |  |  |  | COX6A2  | -1.32 | 9.48E-08 |
|  |  |  |  | COX7B   | -1.32 | 6.04E-04 |
|  |  |  |  | NDUFA3  | -1.29 | 2.76E-04 |
|  |  |  |  | ACAD11  | -1.44 | 3.41E-04 |
|  |  |  |  | AGL     | -1.34 | 4.13E-03 |
|  |  |  |  | AKR1B3  | -1.34 | 1.11E-02 |
|  |  |  |  | AKR7A5  | -1.30 | 4.01E-03 |
|  |  |  |  | ALDH6A1 | -1.47 | 1.12E-03 |
|  |  |  |  | ANKRD9  | -1.59 | 1.64E-04 |
|  |  |  |  | CES3    | -2.18 | 7.42E-03 |
|  |  |  |  | DECR1   | -1.44 | 2.66E-04 |
|  |  |  |  | DHRS11  | -1.34 | 3.98E-03 |
|  |  |  |  | DHRS4   | -1.36 | 8.84E-04 |
|  |  |  |  | ECHDC2  | -1.29 | 8.23E-03 |
|  |  |  |  | ENTPD5  | -1.39 | 2.25E-02 |
|  |  |  |  | EPHX2   | -1.59 | 3.26E-04 |
|  |  |  |  | FAHD1   | -1.43 | 9.51E-04 |
|  |  |  |  | FH1     | -1.37 | 3.53E-04 |
|  |  |  |  | GCDH    | -1.50 | 7.89E-03 |
|  |  |  |  | GPD1    | -1.34 | 4.45E-02 |
|  |  |  |  | GSTK1   | -1.83 | 5.85E-04 |
|  |  |  |  | GSTM2   | -1.38 | 4.84E-05 |
|  |  |  |  | GSTM7   | -1.78 | 4.40E-03 |
|  |  |  |  | HADH    | -1.35 | 8.71E-04 |
|  |  |  |  | HSDL2   | -1.55 | 8.68E-04 |
|  |  |  |  | LONP2   | -1.32 | 4.07E-03 |
|  |  |  |  | ME3     | -1.32 | 2.02E-03 |
|  |  |  |  | MLYCD   | -1.57 | 1.98E-02 |
|  |  |  |  | MSRB2   | -1.37 | 7.04E-03 |
|  |  |  |  | NFS1    | -1.39 | 3.31E-06 |
|  |  |  |  | NUDT4   | -1.35 | 1.18E-03 |
|  |  |  |  | NUDT7   | -1.53 | 7.56E-05 |
|  |  |  |  | OGDHL   | -1.64 | 7.96E-04 |

|                                  |          |      |          |          |       |          |
|----------------------------------|----------|------|----------|----------|-------|----------|
|                                  |          |      |          | PCCA     | -1.34 | 1.50E-03 |
|                                  |          |      |          | PDE4A    | -1.40 | 2.56E-03 |
|                                  |          |      |          | PECI     | -1.39 | 1.92E-03 |
|                                  |          |      |          | PHYHD1   | -1.39 | 3.67E-04 |
|                                  |          |      |          | PPTC7    | -1.41 | 7.00E-05 |
|                                  |          |      |          | SORD     | -1.49 | 2.03E-04 |
|                                  |          |      |          | ACAD10   | -1.55 | 5.34E-03 |
|                                  |          |      |          | ALDH5A1  | -1.52 | 8.29E-04 |
|                                  |          |      |          | DHRS7C   | -1.64 | 8.56E-03 |
|                                  |          |      |          | MAOB     | -1.87 | 1.76E-04 |
|                                  |          |      |          | NQO2     | -1.50 | 7.37E-03 |
|                                  |          |      |          | P4HTM    | -1.50 | 1.48E-03 |
|                                  |          |      |          | SUOX     | -1.49 | 4.91E-03 |
|                                  |          |      |          | COQ3     | -1.49 | 2.70E-04 |
|                                  |          |      |          | ISCA1    | -1.37 | 1.28E-04 |
|                                  |          |      |          | ADCK1    | -1.44 | 2.11E-05 |
|                                  |          |      |          | PHKG1    | -2.43 | 1.46E-05 |
| <b>Vesicle / cell projection</b> |          |      |          |          |       |          |
|                                  | ACTN1    | 1.79 | 3.00E-03 | ACSL1    | -1.41 | 7.73E-03 |
|                                  | ADAM10   | 1.42 | 1.47E-03 | CALCOCO1 | -1.30 | 1.11E-02 |
|                                  | ANO6     | 1.27 | 9.82E-03 | CENPV    | -1.52 | 1.36E-02 |
|                                  | ANXA1    | 1.93 | 6.64E-04 | CORIN    | -1.49 | 2.18E-03 |
|                                  | ANXA7    | 1.26 | 1.75E-02 | CTNNAL1  | -2.10 | 1.49E-02 |
|                                  | ARF4     | 1.38 | 6.96E-04 | EFNB3    | -2.02 | 8.54E-04 |
|                                  | ARHGEF2  | 1.33 | 3.13E-03 | FHL2     | -1.44 | 3.06E-03 |
|                                  | ARPC1B   | 1.60 | 4.71E-04 | LPIN1    | -1.38 | 1.83E-02 |
|                                  | ARPC4    | 1.34 | 7.29E-03 | MAPK14   | -1.37 | 1.51E-04 |
|                                  | BIN3     | 1.32 | 1.49E-02 | MRPL14   | -1.36 | 5.35E-06 |
|                                  | CALD1    | 1.39 | 4.11E-03 | MRPS36   | -1.31 | 2.40E-03 |
|                                  | CAP1     | 1.56 | 6.32E-04 | MYH7B    | -1.35 | 1.24E-02 |
|                                  | CAPG     | 2.08 | 1.70E-03 | RPL3L    | -1.62 | 1.57E-03 |
|                                  | CDC25B   | 2.17 | 2.45E-03 | SGCG     | -1.31 | 4.03E-04 |
|                                  | CDC42SE1 | 1.42 | 4.03E-03 | SLC2A4   | -1.35 | 1.54E-03 |
|                                  | CFL1     | 1.54 | 1.71E-03 | STAU2    | -1.32 | 1.12E-02 |
|                                  | CHRNB1   | 1.47 | 3.43E-04 | TTLL1    | -1.92 | 4.18E-06 |
|                                  | DAB2     | 1.94 | 4.92E-03 | TUBA8    | -1.49 | 7.90E-03 |
|                                  | DBNL     | 1.24 | 1.56E-02 | WHRN     | -1.90 | 5.32E-04 |
|                                  | DNM1     | 2.06 | 9.60E-06 |          |       |          |
|                                  | DNMT1    | 1.64 | 1.11E-02 |          |       |          |
|                                  | DOCK1    | 1.37 | 3.09E-03 |          |       |          |
|                                  | DPYSL3   | 2.09 | 2.31E-03 |          |       |          |

|  |          |      |          |  |  |  |
|--|----------|------|----------|--|--|--|
|  | DYNLL1   | 1.57 | 7.64E-03 |  |  |  |
|  | EMP1     | 2.88 | 1.80E-04 |  |  |  |
|  | ENAH     | 1.64 | 5.86E-03 |  |  |  |
|  | FABP5    | 1.74 | 6.45E-03 |  |  |  |
|  | FADS1    | 1.54 | 2.20E-04 |  |  |  |
|  | FARP1    | 1.68 | 8.47E-03 |  |  |  |
|  | FLNA     | 1.44 | 1.41E-03 |  |  |  |
|  | FSCN1    | 2.43 | 1.21E-03 |  |  |  |
|  | GLTP     | 1.50 | 1.69E-02 |  |  |  |
|  | GNB1     | 1.31 | 8.17E-05 |  |  |  |
|  | HSP90AA1 | 1.30 | 1.70E-03 |  |  |  |
|  | ICAM2    | 1.52 | 2.44E-03 |  |  |  |
|  | IPO9     | 1.54 | 2.10E-02 |  |  |  |
|  | ITSN2    | 1.25 | 2.89E-03 |  |  |  |
|  | KIF3B    | 1.44 | 8.57E-03 |  |  |  |
|  | LEPRE1   | 1.38 | 4.38E-03 |  |  |  |
|  | LIMK1    | 1.53 | 2.08E-02 |  |  |  |
|  | MRC2     | 2.39 | 2.18E-04 |  |  |  |
|  | MSN      | 1.54 | 2.12E-03 |  |  |  |
|  | MTAP1A   | 1.82 | 1.28E-02 |  |  |  |
|  | MYH10    | 1.72 | 4.24E-04 |  |  |  |
|  | MYO1C    | 1.36 | 1.49E-03 |  |  |  |
|  | MYO1D    | 1.56 | 5.90E-04 |  |  |  |
|  | MYO9B    | 1.48 | 8.32E-05 |  |  |  |
|  | NCK2     | 1.40 | 7.83E-03 |  |  |  |
|  | NIN      | 1.38 | 2.63E-03 |  |  |  |
|  | NPC2     | 1.36 | 3.60E-02 |  |  |  |
|  | NUP50    | 1.30 | 5.97E-03 |  |  |  |
|  | P4HB     | 1.34 | 1.18E-02 |  |  |  |
|  | PDIA3    | 1.45 | 8.91E-04 |  |  |  |
|  | PDIA4    | 1.44 | 7.12E-04 |  |  |  |
|  | PHLDA3   | 2.11 | 3.40E-03 |  |  |  |
|  | PPIB     | 1.32 | 1.19E-02 |  |  |  |
|  | PPP1R9B  | 1.49 | 5.72E-03 |  |  |  |
|  | PRAF2    | 1.57 | 3.78E-03 |  |  |  |
|  | PRKD2    | 1.43 | 9.09E-03 |  |  |  |
|  | PTPN23   | 1.32 | 4.73E-04 |  |  |  |
|  | PXN      | 1.33 | 2.69E-03 |  |  |  |
|  | RAB13    | 1.59 | 7.85E-03 |  |  |  |
|  | RAB5C    | 1.27 | 2.74E-03 |  |  |  |
|  | RASSF1   | 1.30 | 9.63E-03 |  |  |  |

|                                                                     |          |      |          |       |       |          |
|---------------------------------------------------------------------|----------|------|----------|-------|-------|----------|
|                                                                     | SCARB1   | 1.46 | 2.01E-03 |       |       |          |
|                                                                     | SERP1    | 1.36 | 2.95E-03 |       |       |          |
|                                                                     | SERPINF1 | 2.60 | 2.96E-03 |       |       |          |
|                                                                     | SIRPA    | 1.31 | 5.44E-02 |       |       |          |
|                                                                     | SMAGP    | 1.37 | 5.40E-03 |       |       |          |
|                                                                     | SNX8     | 1.37 | 4.77E-03 |       |       |          |
|                                                                     | SPNA2    | 1.25 | 3.91E-03 |       |       |          |
|                                                                     | SRGAP2   | 1.31 | 7.99E-03 |       |       |          |
|                                                                     | SURF6    | 1.34 | 7.46E-03 |       |       |          |
|                                                                     | SYNPO2L  | 2.92 | 2.85E-03 |       |       |          |
|                                                                     | TLN1     | 1.24 | 1.60E-02 |       |       |          |
|                                                                     | TMSB10   | 2.13 | 6.63E-04 |       |       |          |
|                                                                     | TMSB4X   | 1.62 | 2.51E-03 |       |       |          |
|                                                                     | TNKS1BP1 | 1.44 | 2.88E-04 |       |       |          |
|                                                                     | TPM2     | 1.38 | 1.34E-02 |       |       |          |
|                                                                     | TPM3     | 1.55 | 4.68E-03 |       |       |          |
|                                                                     | TRAM1    | 1.38 | 7.26E-04 |       |       |          |
|                                                                     | TTYH3    | 1.66 | 2.02E-03 |       |       |          |
|                                                                     | TUBA1A   | 1.48 | 3.17E-03 |       |       |          |
|                                                                     | TUBA1B   | 1.50 | 2.96E-03 |       |       |          |
|                                                                     | TUBB5    | 1.67 | 1.73E-04 |       |       |          |
|                                                                     | TYK2     | 1.27 | 2.68E-03 |       |       |          |
|                                                                     | VASP     | 1.44 | 9.07E-04 |       |       |          |
|                                                                     | WIPF1    | 1.77 | 4.12E-04 |       |       |          |
|                                                                     | YWHAB    | 1.34 | 1.38E-03 |       |       |          |
|                                                                     | ZYX      | 1.43 | 3.22E-03 |       |       |          |
| <b>Cardiac contraction / calcium signaling / muscle development</b> |          |      |          |       |       |          |
|                                                                     | VCAN     | 2.43 | 3.72E-04 | ACADM | -1.61 | 2.96E-04 |
|                                                                     | VASH1    | 2.27 | 4.58E-06 | ATP5H | -1.35 | 1.52E-03 |
|                                                                     | TPM4     | 1.97 | 1.32E-04 | PLN   | -1.46 | 1.41E-04 |
|                                                                     | THY1     | 1.71 | 3.40E-03 |       |       |          |
|                                                                     | TGFBR2   | 1.50 | 8.22E-05 |       |       |          |
|                                                                     | TAGLN2   | 1.88 | 3.02E-04 |       |       |          |
|                                                                     | SRI      | 1.39 | 7.13E-03 |       |       |          |
|                                                                     | SPARCL1  | 1.60 | 1.96E-03 |       |       |          |
|                                                                     | SMAD1    | 1.57 | 1.05E-03 |       |       |          |
|                                                                     | SHC1     | 1.32 | 6.18E-03 |       |       |          |
|                                                                     | SERP1    | 1.36 | 2.95E-03 |       |       |          |
|                                                                     | RTN4     | 2.11 | 9.82E-03 |       |       |          |
|                                                                     | RCN3     | 2.06 | 1.59E-02 |       |       |          |
|                                                                     | RCAN1    | 2.13 | 2.58E-02 |       |       |          |



|          |      |          |  |  |  |
|----------|------|----------|--|--|--|
| PXDN     | 1.84 | 1.44E-04 |  |  |  |
| PTK2     | 1.29 | 7.68E-04 |  |  |  |
| PLXND1   | 1.65 | 8.94E-04 |  |  |  |
| PLSCR3   | 1.39 | 4.25E-03 |  |  |  |
| PKD1     | 1.37 | 3.48E-03 |  |  |  |
| PCDHGA11 | 1.31 | 4.38E-04 |  |  |  |
| PCDH1    | 1.56 | 3.02E-04 |  |  |  |
| NPPB     | 2.67 | 4.20E-03 |  |  |  |
| NOTCH4   | 1.45 | 1.70E-02 |  |  |  |
| NOTCH3   | 1.29 | 9.28E-04 |  |  |  |
| NID1     | 1.77 | 3.09E-05 |  |  |  |
| MYL6     | 1.37 | 1.57E-04 |  |  |  |
| MYH9     | 1.77 | 4.37E-05 |  |  |  |
| MRC2     | 2.39 | 2.18E-04 |  |  |  |
| MMP2     | 1.43 | 2.99E-03 |  |  |  |
| MGP      | 1.78 | 2.44E-04 |  |  |  |
| MEOX2    | 1.78 | 5.51E-03 |  |  |  |
| LAMA4    | 1.57 | 7.38E-03 |  |  |  |
| KLF10    | 1.72 | 3.01E-03 |  |  |  |
| JUNB     | 1.37 | 7.52E-03 |  |  |  |
| ITGA6    | 1.91 | 4.14E-04 |  |  |  |
| ITGA5    | 1.59 | 1.87E-03 |  |  |  |
| HMOX1    | 2.09 | 3.21E-03 |  |  |  |
| HBEGF    | 2.15 | 3.26E-03 |  |  |  |
| GPX1     | 1.41 | 9.62E-04 |  |  |  |
| GATAD2A  | 1.27 | 3.65E-04 |  |  |  |
| FSTL1    | 2.86 | 1.81E-03 |  |  |  |
| FKBP1A   | 1.29 | 1.48E-04 |  |  |  |
| FGFR1    | 1.38 | 5.60E-04 |  |  |  |
| FBN1     | 2.65 | 2.94E-04 |  |  |  |
| FBLN2    | 2.05 | 2.70E-03 |  |  |  |
| ENAH     | 1.64 | 5.86E-03 |  |  |  |
| EHD2     | 1.58 | 5.61E-04 |  |  |  |
| EFHD2    | 1.69 | 1.41E-02 |  |  |  |
| ECSCR    | 1.55 | 6.18E-03 |  |  |  |
| CYR61    | 1.41 | 1.95E-02 |  |  |  |
| CSPG4    | 1.60 | 6.54E-05 |  |  |  |
| COL5A1   | 3.02 | 1.87E-02 |  |  |  |
| CDH5     | 1.50 | 7.78E-04 |  |  |  |
| CD93     | 1.69 | 1.18E-03 |  |  |  |
| CAV1     | 1.49 | 2.99E-05 |  |  |  |

|                     |          |      |          |          |       |          |
|---------------------|----------|------|----------|----------|-------|----------|
|                     | CASQ1    | 1.56 | 5.14E-03 |          |       |          |
|                     | CAPN2    | 1.28 | 2.29E-04 |          |       |          |
|                     | BMP1     | 1.51 | 2.15E-02 |          |       |          |
|                     | APP      | 1.33 | 5.23E-04 |          |       |          |
|                     | APOE     | 1.33 | 9.50E-02 |          |       |          |
|                     | ANXA7    | 1.26 | 1.75E-02 |          |       |          |
|                     | ANXA5    | 1.32 | 3.72E-04 |          |       |          |
|                     | ANXA4    | 1.52 | 8.84E-03 |          |       |          |
|                     | ANXA2    | 1.83 | 1.20E-03 |          |       |          |
|                     | ANKRD1   | 3.52 | 8.29E-04 |          |       |          |
|                     | AGRN     | 1.54 | 1.27E-03 |          |       |          |
|                     | ACVRL1   | 1.45 | 1.06E-02 |          |       |          |
|                     | ACTN4    | 1.45 | 7.89E-05 |          |       |          |
|                     | ACTG1    | 1.36 | 1.39E-04 |          |       |          |
|                     | ACTB     | 1.48 | 2.84E-04 |          |       |          |
|                     | ACTA1    | 3.70 | 3.76E-03 |          |       |          |
| <b>Cytoskeleton</b> |          |      |          |          |       |          |
|                     | AKAP2    | 1.54 | 5.78E-03 | TUBA4A   | -1.28 | 3.94E-02 |
|                     | ARPC4    | 1.34 | 7.29E-03 | TTLL1    | -1.92 | 4.18E-06 |
|                     | BIN3     | 1.32 | 1.49E-02 | SLC25A34 | -1.83 | 1.36E-02 |
|                     | CDK5RAP2 | 1.39 | 1.84E-03 | SLC25A22 | -1.75 | 1.60E-02 |
|                     | CEP250   | 1.86 | 1.61E-03 | RHOT2    | -1.40 | 6.47E-05 |
|                     | CORO1C   | 1.46 | 5.11E-05 | PXMP2    | -1.76 | 4.93E-06 |
|                     | COTL1    | 2.21 | 8.95E-03 | PICK1    | -1.35 | 1.79E-03 |
|                     | CSRP1    | 1.54 | 1.69E-05 | PCNT     | -1.50 | 1.27E-04 |
|                     | CST6     | 2.20 | 4.19E-03 | NDUFS1   | -1.35 | 7.99E-03 |
|                     | DBN1     | 2.42 | 3.58E-03 | MRPS35   | -1.57 | 5.83E-04 |
|                     | EPB4.1L1 | 1.52 | 1.58E-03 | MRPL45   | -1.31 | 1.07E-03 |
|                     | FLNB     | 1.87 | 2.20E-05 | MRPL14   | -1.36 | 5.35E-06 |
|                     | FYN      | 1.40 | 2.01E-02 | MFN1     | -1.48 | 6.18E-03 |
|                     | GAS2L1   | 1.39 | 1.78E-03 | MAPK1IP1 | -1.43 | 3.31E-03 |
|                     | HOMER3   | 1.64 | 1.38E-02 | MAPK14   | -1.37 | 1.51E-04 |
|                     | KITL     | 1.51 | 4.76E-03 | LDB3     | -1.38 | 3.29E-04 |
|                     | LASPI    | 1.91 | 1.42E-04 | HSD17B10 | -1.38 | 5.64E-05 |
|                     | LIMA1    | 1.36 | 3.00E-03 | ANK1     | -1.30 | 2.75E-04 |
|                     | MAP3K11  | 1.37 | 5.35E-04 | ACAT1    | -1.36 | 8.31E-04 |
|                     | MARCKS   | 1.78 | 2.51E-03 | ACACB    | -1.51 | 1.58E-03 |
|                     | MYBPC2   | 2.84 | 1.35E-03 |          |       |          |
|                     | MYO1B    | 1.76 | 8.58E-03 |          |       |          |
|                     | NAV1     | 1.37 | 8.03E-03 |          |       |          |
|                     | NES      | 2.23 | 7.07E-05 |          |       |          |

|                      |          |      |          |          |       |          |
|----------------------|----------|------|----------|----------|-------|----------|
|                      | PFN1     | 1.34 | 1.01E-02 |          |       |          |
|                      | PPP1R9B  | 1.49 | 5.72E-03 |          |       |          |
|                      | RNF19A   | 1.30 | 1.38E-04 |          |       |          |
|                      | SDC3     | 1.68 | 1.08E-03 |          |       |          |
|                      | TMOD3    | 1.48 | 2.96E-04 |          |       |          |
|                      | VIM      | 2.66 | 5.00E-04 |          |       |          |
|                      | XIRP2    | 2.11 | 8.55E-03 |          |       |          |
| <b>Transcription</b> |          |      |          |          |       |          |
|                      | ZNFX1    | 1.24 | 4.37E-03 | ZFP775   | -1.26 | 1.27E-02 |
|                      | ZFP664   | 1.34 | 3.90E-03 | ZFP238   | -1.29 | 2.36E-03 |
|                      | TLR4     | 1.76 | 4.11E-03 | ZBTB16   | -1.99 | 6.19E-04 |
|                      | TCF4     | 1.40 | 4.60E-05 | YBX2     | -1.46 | 9.48E-03 |
|                      | TCF3     | 1.36 | 7.76E-03 | TFDP2    | -1.63 | 1.22E-04 |
|                      | STAT1    | 1.28 | 7.20E-03 | TCEA3    | -1.36 | 2.32E-02 |
|                      | SMARCD2  | 1.38 | 7.88E-03 | TBX5     | -1.96 | 7.88E-05 |
|                      | SCX      | 1.43 | 1.44E-02 | SMAD6    | -1.48 | 9.55E-03 |
|                      | RPS6KA4  | 1.40 | 9.13E-03 | RXRG     | -1.60 | 3.59E-04 |
|                      | RHOG     | 1.45 | 5.67E-04 | PPARGC1A | -1.79 | 7.02E-04 |
|                      | RELB     | 1.82 | 1.50E-03 | PPARA    | -1.55 | 1.39E-02 |
|                      | PDLIM1   | 1.48 | 6.00E-03 | MAPK14   | -1.37 | 1.51E-04 |
|                      | NOSTRIN  | 1.78 | 1.89E-03 | KLF15    | -1.61 | 5.74E-03 |
|                      | NFKB2    | 1.37 | 7.92E-04 | KHDRBS3  | -1.30 | 1.30E-04 |
|                      | NFATC2   | 1.48 | 6.48E-03 | KCNH2    | -1.57 | 3.67E-03 |
|                      | NDN      | 1.49 | 3.90E-03 | ESRRG    | -1.57 | 2.93E-04 |
|                      | MORF4L2  | 1.33 | 1.52E-03 | DPF3     | -1.45 | 3.01E-03 |
|                      | MEOX1    | 2.77 | 1.16E-03 | CREG1    | -1.37 | 3.79E-03 |
|                      | MAZ      | 1.28 | 1.55E-03 |          |       |          |
|                      | KLF10    | 1.72 | 3.01E-03 |          |       |          |
|                      | JUND     | 1.31 | 4.08E-03 |          |       |          |
|                      | IRF9     | 1.73 | 2.98E-02 |          |       |          |
|                      | HMOX1    | 2.09 | 3.21E-03 |          |       |          |
|                      | GATAD2A  | 1.27 | 3.65E-04 |          |       |          |
|                      | FLI1     | 1.32 | 1.01E-02 |          |       |          |
|                      | ETS1     | 1.40 | 2.09E-02 |          |       |          |
|                      | ERG      | 1.45 | 5.54E-03 |          |       |          |
|                      | ELF4     | 1.76 | 1.09E-04 |          |       |          |
|                      | CTNNBIP1 | 1.40 | 1.41E-03 |          |       |          |
|                      | CREB3L2  | 1.46 | 7.32E-03 |          |       |          |
|                      | CHD3     | 1.37 | 6.45E-03 |          |       |          |
|                      | CARHSP1  | 1.76 | 1.12E-04 |          |       |          |
|                      | BHLHE40  | 1.51 | 1.66E-04 |          |       |          |

|                      |          |      |          |       |       |          |
|----------------------|----------|------|----------|-------|-------|----------|
|                      | BCL6B    | 1.89 | 6.62E-03 |       |       |          |
|                      | ATOH8    | 1.56 | 9.38E-03 |       |       |          |
|                      | ADAR     | 1.65 | 1.76E-02 |       |       |          |
| <b>Cell adhesion</b> |          |      |          |       |       |          |
|                      | VWA1     | 1.60 | 2.99E-04 | LAMB3 | -1.75 | 5.65E-04 |
|                      | VCAN     | 2.43 | 3.72E-04 | LAMB3 | -1.75 | 5.65E-04 |
|                      | TPM4     | 1.97 | 1.32E-04 | GJA3  | -1.56 | 6.19E-04 |
|                      | TNS3     | 1.33 | 2.24E-03 | GJA3  | -1.56 | 6.19E-04 |
|                      | THBS3    | 2.07 | 2.70E-04 | DSG2  | -1.53 | 4.44E-04 |
|                      | STAB1    | 1.87 | 1.54E-02 | DSG2  | -1.53 | 4.44E-04 |
|                      | POSTN    | 8.46 | 9.87E-03 | DSC2  | -1.35 | 4.75E-04 |
|                      | PODN     | 1.38 | 5.53E-03 | DSC2  | -1.35 | 4.75E-04 |
|                      | PF4      | 1.47 | 4.21E-03 | COLQ  | -1.74 | 1.05E-03 |
|                      | NRP2     | 2.04 | 1.99E-05 | COLQ  | -1.74 | 1.05E-03 |
|                      | NLGN2    | 1.98 | 1.23E-03 |       |       |          |
|                      | MYBPC2   | 2.84 | 1.35E-03 |       |       |          |
|                      | MMRN2    | 1.49 | 1.10E-03 |       |       |          |
|                      | MFAP4    | 5.33 | 1.62E-04 |       |       |          |
|                      | MCAM     | 1.82 | 8.07E-05 |       |       |          |
|                      | LUM      | 2.03 | 7.61E-04 |       |       |          |
|                      | LTBP4    | 1.48 | 1.57E-02 |       |       |          |
|                      | LTBP3    | 1.61 | 1.08E-02 |       |       |          |
|                      | LGALS3BP | 2.60 | 1.84E-06 |       |       |          |
|                      | LGALS1   | 1.57 | 1.64E-02 |       |       |          |
|                      | LAMC1    | 1.64 | 4.54E-05 |       |       |          |
|                      | ITGA9    | 1.74 | 2.46E-03 |       |       |          |
|                      | IGFBP7   | 2.05 | 3.02E-04 |       |       |          |
|                      | ICAM2    | 1.52 | 2.44E-03 |       |       |          |
|                      | ICAM1    | 1.37 | 5.07E-03 |       |       |          |
|                      | HSPG2    | 1.39 | 1.27E-04 |       |       |          |
|                      | FBLN5    | 1.34 | 1.14E-02 |       |       |          |
|                      | FBLN2    | 2.05 | 2.70E-03 |       |       |          |
|                      | F13A1    | 1.57 | 5.01E-04 |       |       |          |
|                      | ENTPD1   | 1.70 | 2.45E-03 |       |       |          |
|                      | EMILIN1  | 2.31 | 3.74E-03 |       |       |          |
|                      | DCN      | 1.29 | 7.97E-04 |       |       |          |
|                      | DCHS1    | 1.79 | 3.12E-03 |       |       |          |
|                      | CSK      | 1.39 | 6.37E-03 |       |       |          |
|                      | COL8A1   | 4.27 | 2.44E-03 |       |       |          |
|                      | COL6A3   | 2.70 | 9.69E-03 |       |       |          |
|                      | COL6A2   | 2.58 | 1.40E-04 |       |       |          |

|                              |          |      |          |         |       |          |
|------------------------------|----------|------|----------|---------|-------|----------|
|                              | COL4A2   | 1.64 | 5.67E-04 |         |       |          |
|                              | COL4A2   | 1.64 | 5.67E-04 |         |       |          |
|                              | COL4A1   | 1.81 | 1.41E-04 |         |       |          |
|                              | COL3A1   | 4.43 | 2.99E-02 |         |       |          |
|                              | COL1A2   | 4.39 | 3.54E-02 |         |       |          |
|                              | COL18A1  | 2.82 | 3.61E-04 |         |       |          |
|                              | COL16A1  | 3.06 | 1.29E-03 |         |       |          |
|                              | COL15A1  | 2.61 | 1.33E-04 |         |       |          |
|                              | COL14A1  | 2.67 | 2.06E-03 |         |       |          |
|                              | CDH5     | 1.50 | 7.78E-04 |         |       |          |
|                              | CD9      | 1.39 | 2.28E-03 |         |       |          |
|                              | CD34     | 1.68 | 7.72E-04 |         |       |          |
|                              | CCDC80   | 1.81 | 3.01E-02 |         |       |          |
|                              | BGN      | 2.99 | 2.29E-03 |         |       |          |
|                              | AOC3     | 1.42 | 4.34E-03 |         |       |          |
|                              | AHNAK    | 1.31 | 5.54E-03 |         |       |          |
|                              | ADAMTSL5 | 1.25 | 2.14E-03 |         |       |          |
|                              | ADAM15   | 1.40 | 6.55E-03 |         |       |          |
| <b>Programmed cell death</b> |          |      |          |         |       |          |
|                              | YWHAH    | 1.45 | 3.31E-04 | ZBTB16  | -1.99 | 6.19E-04 |
|                              | TNFRSF1A | 1.38 | 3.06E-02 | STAT5B  | -1.27 | 1.44E-02 |
|                              | TICAM1   | 1.38 | 7.16E-04 | SH3KBP1 | -1.47 | 2.84E-03 |
|                              | TGFB1    | 1.57 | 1.03E-04 | PIK3R1  | -1.51 | 1.08E-03 |
|                              | SLK      | 1.28 | 3.14E-03 | NTN1    | -1.38 | 1.43E-03 |
|                              | SHISA5   | 1.37 | 1.34E-02 | ENDOG   | -1.36 | 2.95E-04 |
|                              | PPM1F    | 1.71 | 1.04E-05 | CUL1    | -1.40 | 7.72E-03 |
|                              | PIGT     | 1.36 | 1.69E-03 | APBB1   | -1.67 | 4.12E-04 |
|                              | PHLDA3   | 2.11 | 3.40E-03 |         |       |          |
|                              | PEA15A   | 1.50 | 2.25E-03 |         |       |          |
|                              | NRAS     | 1.29 | 3.45E-04 |         |       |          |
|                              | LYZ2     | 1.82 | 2.64E-02 |         |       |          |
|                              | LITAF    | 1.78 | 3.26E-03 |         |       |          |
|                              | KLF10    | 1.72 | 3.01E-03 |         |       |          |
|                              | KITL     | 1.51 | 4.76E-03 |         |       |          |
|                              | GPX1     | 1.41 | 9.62E-04 |         |       |          |
|                              | GCLM     | 1.36 | 6.59E-04 |         |       |          |
|                              | GATAD2A  | 1.27 | 3.65E-04 |         |       |          |
|                              | FGFR1    | 1.38 | 5.60E-04 |         |       |          |
|                              | FCGR3    | 2.13 | 5.45E-03 |         |       |          |
|                              | FCER1G   | 2.04 | 2.42E-02 |         |       |          |
|                              | BAX      | 1.29 | 9.58E-04 |         |       |          |

|                               |         |      |          |         |       |          |
|-------------------------------|---------|------|----------|---------|-------|----------|
|                               | BAK1    | 1.89 | 4.32E-03 |         |       |          |
| <b>Lysosome / proteolysis</b> |         |      |          |         |       |          |
|                               | UBE2L6  | 2.00 | 1.45E-02 |         |       |          |
|                               | UBA7    | 1.55 | 4.83E-03 |         |       |          |
|                               | SOCS2   | 1.79 | 1.51E-02 |         |       |          |
|                               | SCPEP1  | 1.64 | 1.72E-04 |         |       |          |
|                               | S100A6  | 1.52 | 4.09E-03 |         |       |          |
|                               | S100A11 | 1.96 | 7.49E-03 |         |       |          |
|                               | S100A10 | 1.54 | 1.71E-02 |         |       |          |
|                               | RNF19A  | 1.30 | 1.38E-04 |         |       |          |
|                               | PRCP    | 2.28 | 4.78E-04 |         |       |          |
|                               | NPC2    | 1.36 | 3.60E-02 |         |       |          |
|                               | LITAF   | 1.78 | 3.26E-03 |         |       |          |
|                               | LGMN    | 1.48 | 1.33E-02 |         |       |          |
|                               | LAPTM5  | 2.08 | 5.32E-03 |         |       |          |
|                               | FUCA1   | 1.28 | 1.23E-02 |         |       |          |
|                               | CTSZ    | 1.74 | 6.22E-04 |         |       |          |
|                               | CHFR    | 1.32 | 1.49E-03 |         |       |          |
|                               | CD63    | 1.30 | 2.38E-02 |         |       |          |
|                               | CAPN2   | 1.28 | 2.29E-04 |         |       |          |
|                               | C1QC    | 1.73 | 8.62E-03 |         |       |          |
|                               | C1QB    | 1.72 | 8.62E-03 |         |       |          |
|                               | C1QA    | 1.70 | 8.40E-03 |         |       |          |
|                               | ARL8A   | 1.37 | 4.97E-03 |         |       |          |
|                               | ACE     | 2.39 | 6.04E-05 |         |       |          |
| <b>Cell cycle</b>             |         |      |          |         |       |          |
|                               | RASSF2  | 1.88 | 7.08E-03 |         |       |          |
|                               | MAD2L2  | 1.51 | 3.21E-03 |         |       |          |
|                               | HJURP   | 2.22 | 1.42E-02 |         |       |          |
|                               | H2AFX   | 1.60 | 7.44E-03 |         |       |          |
|                               | GAS2L1  | 1.39 | 1.78E-03 |         |       |          |
|                               | CKS1B   | 2.61 | 1.89E-03 |         |       |          |
|                               | CHFR    | 1.32 | 1.49E-03 |         |       |          |
|                               | CEP250  | 1.86 | 1.61E-03 |         |       |          |
|                               | CCND3   | 1.28 | 1.97E-02 |         |       |          |
|                               | CCND2   | 1.45 | 1.71E-03 |         |       |          |
|                               | CCND1   | 1.96 | 8.15E-04 |         |       |          |
|                               | ARHGAP8 | 1.66 | 6.13E-03 |         |       |          |
|                               | ANP32B  | 1.35 | 4.04E-03 |         |       |          |
| <b>Homeostasis</b>            |         |      |          |         |       |          |
|                               | ZFP664  | 1.34 | 3.90E-03 | ZFYVE21 | -1.64 | 1.04E-04 |

|         |      |          |          |       |          |
|---------|------|----------|----------|-------|----------|
| ZFP36L2 | 1.69 | 4.05E-03 | VDAC3    | -1.31 | 5.09E-03 |
| ZFP366  | 1.46 | 2.48E-03 | TESC     | -1.38 | 7.73E-04 |
| ZC3HAV1 | 1.46 | 2.87E-03 | TECR     | -1.29 | 3.25E-03 |
| TRIM47  | 1.83 | 4.61E-03 | SLC38A3  | -1.50 | 2.49E-03 |
| TRIM16  | 1.95 | 7.89E-04 | SLC31A2  | -1.33 | 7.12E-05 |
| SULF1   | 1.87 | 6.12E-04 | SLC27A1  | -1.79 | 1.30E-02 |
| RNF145  | 1.41 | 1.70E-04 | SLC25A42 | -1.70 | 1.78E-04 |
| RNF115  | 1.54 | 1.01E-06 | SLC25A4  | -1.37 | 2.10E-03 |
| RCN1    | 1.63 | 3.64E-03 | SLC25A20 | -1.42 | 9.30E-03 |
| RABIF   | 1.45 | 1.52E-02 | SLC25A12 | -1.42 | 1.77E-02 |
| PTGIS   | 1.80 | 9.46E-04 | SLC22A5  | -1.57 | 1.89E-03 |
| PLOD3   | 1.49 | 1.83E-03 | SCN4A    | -1.54 | 2.28E-03 |
| PLOD1   | 1.41 | 2.07E-03 | SAR1B    | -1.27 | 1.76E-02 |
| PARP12  | 1.32 | 9.54E-03 | RTN4IP1  | -1.31 | 6.42E-04 |
| PAPLN   | 1.67 | 8.54E-04 | RHOT2    | -1.40 | 6.47E-05 |
| NUDT5   | 1.56 | 1.18E-02 | RANGRF   | -1.34 | 2.28E-05 |
| NUDT18  | 1.74 | 5.33E-05 | PPM1K    | -1.61 | 1.19E-03 |
| NT5C    | 1.63 | 4.98E-03 | PPA2     | -1.30 | 2.65E-03 |
| NID2    | 2.43 | 7.37E-06 | PDP2     | -1.85 | 9.40E-04 |
| MOBKL2A | 2.07 | 1.02E-03 | P4HTM    | -1.50 | 1.48E-03 |
| MAN2B1  | 1.39 | 1.40E-02 | NUDT7    | -1.53 | 7.56E-05 |
| LOXL1   | 1.89 | 7.50E-03 | NUDT4    | -1.35 | 1.18E-03 |
| LIMK1   | 1.53 | 2.08E-02 | NQO2     | -1.50 | 7.37E-03 |
| LEPREL2 | 1.92 | 8.91E-03 | MRPL45   | -1.31 | 1.07E-03 |
| LASP1   | 1.91 | 1.42E-04 | KCNK3    | -1.38 | 9.56E-05 |
| KLF10   | 1.72 | 3.01E-03 | KCNJ12   | -1.81 | 7.78E-04 |
| GUSB    | 1.35 | 1.03E-02 | KCNJ11   | -1.43 | 1.93E-04 |
| GBA     | 1.54 | 1.09E-02 | ITGB1BP2 | -1.36 | 6.07E-04 |
| FTL2    | 1.35 | 1.41E-02 | GAL3ST3  | -1.88 | 1.14E-02 |
| FKBP10  | 1.67 | 9.81E-04 | FDX1     | -1.37 | 1.99E-03 |
| EDEM2   | 1.41 | 1.77E-03 | FBLIM1   | -1.28 | 5.03E-02 |
| CYBA    | 1.42 | 6.94E-03 | FARS2    | -1.28 | 2.05E-03 |
| CSRP1   | 1.54 | 1.69E-05 | FABP3    | -1.32 | 4.07E-04 |
| CLIC1   | 1.76 | 3.18E-04 | ESRRA    | -1.32 | 3.82E-04 |
| CHFR    | 1.32 | 1.49E-03 | ENO3     | -1.48 | 3.17E-03 |
| CD248   | 1.88 | 7.26E-04 | DUSP18   | -1.95 | 4.60E-04 |
| CASQ1   | 1.56 | 5.14E-03 | DPF3     | -1.45 | 3.01E-03 |
| ATP8B2  | 1.70 | 1.01E-03 | CAR14    | -1.41 | 6.30E-03 |
| ATP13A3 | 1.39 | 2.34E-03 | CACNA1C  | -1.33 | 5.14E-04 |
| ADAM19  | 2.00 | 3.86E-05 | APOBEC2  | -1.32 | 1.18E-04 |
| ACSL5   | 1.49 | 9.49E-03 | AP4S1    | -1.54 | 9.22E-04 |

|                                        |          |      |          |         |       |          |
|----------------------------------------|----------|------|----------|---------|-------|----------|
|                                        |          |      |          | ANO10   | -2.10 | 3.81E-04 |
|                                        |          |      |          | ALAD    | -1.31 | 8.28E-03 |
|                                        |          |      |          | ACAT1   | -1.36 | 8.31E-04 |
| <b>Differentiation / proliferation</b> |          |      |          |         |       |          |
|                                        | TGFB111  | 1.41 | 3.50E-03 | TGFBR3  | -1.48 | 1.02E-02 |
|                                        | STX2     | 1.79 | 2.90E-03 | TAB1    | -1.48 | 7.02E-05 |
|                                        | SHROOM3  | 1.51 | 4.95E-03 | FXN     | -1.32 | 3.62E-03 |
|                                        | IGF1     | 2.85 | 1.79E-02 | ESRRB   | -1.35 | 6.11E-04 |
|                                        | HCLS1    | 1.82 | 7.48E-04 | EFNB3   | -2.02 | 8.54E-04 |
|                                        | EPB4.1L2 | 1.48 | 2.72E-04 | AGTPBP1 | -1.42 | 1.73E-03 |
|                                        | DDR2     | 1.35 | 3.29E-03 |         |       |          |
|                                        | CYFIP1   | 1.31 | 1.65E-04 |         |       |          |
|                                        | CDC42EP2 | 1.36 | 4.42E-03 |         |       |          |
| <b>Cell motion</b>                     |          |      |          |         |       |          |
|                                        | ITGAM    | 1.79 | 1.30E-03 |         |       |          |
|                                        | ITGA1    | 1.65 | 8.36E-03 |         |       |          |



**Supplemental Table S3. RISC-enriched cardiac mRNAs**

| <b>Genes</b> | <b>Sham RISC Score (mean)</b> | <b>Sham RISC Score (S.E.M)</b> | <b>TAC RISC Score (mean)</b> | <b>TAC RISC Score (S.E.M)</b> | <b>Fold Change (TAC-Sham)</b> | <b>P- Value</b> |
|--------------|-------------------------------|--------------------------------|------------------------------|-------------------------------|-------------------------------|-----------------|
| Tcf20        | 21.5                          | 2.1                            | 16.2                         | 1.0                           | -1.3                          | 0.05918         |
| Lars2        | 11.0                          | 0.9                            | 7.9                          | 1.1                           | -1.4                          | 0.05037         |
| Lpp          | 11.0                          | 0.9                            | 5.3                          | 0.3                           | -2.1                          | 0.00108         |
| Thbs1        | 10.8                          | 3.9                            | 2.2                          | 0.5                           | -5.0                          | 0.07920         |
| Calcr1       | 10.0                          | 1.2                            | 5.2                          | 0.8                           | -1.9                          | 0.00713         |
| Yipf6        | 9.9                           | 1.3                            | 6.2                          | 1.3                           | -1.6                          | 0.07788         |
| Sntb2        | 9.9                           | 1.5                            | 2.5                          | 0.2                           | -3.9                          | 0.00447         |
| Gtf2a1       | 9.7                           | 0.9                            | 6.0                          | 0.5                           | -1.6                          | 0.00930         |
| Hist1h4c     | 9.7                           | 1.3                            | 4.6                          | 0.5                           | -2.1                          | 0.00907         |
| Lnpep        | 9.6                           | 0.4                            | 6.7                          | 0.3                           | -1.4                          | 0.00025         |
| Tbl1xr1      | 9.6                           | 0.5                            | 7.1                          | 0.6                           | -1.4                          | 0.01235         |
| Rc3h1        | 9.2                           | 0.8                            | 7.1                          | 0.3                           | -1.3                          | 0.03968         |
| Ccdc50       | 8.7                           | 1.6                            | 4.5                          | 0.5                           | -1.9                          | 0.04133         |
| Dpysl2       | 8.3                           | 0.7                            | 3.9                          | 0.4                           | -2.1                          | 0.00101         |
| Bmpr2        | 8.1                           | 0.5                            | 5.4                          | 0.3                           | -1.5                          | 0.00113         |
| Mib1         | 7.8                           | 0.5                            | 3.6                          | 0.2                           | -2.2                          | 0.00018         |
| Hook3        | 7.8                           | 0.7                            | 4.2                          | 0.2                           | -1.9                          | 0.00283         |
| E2f3         | 7.8                           | 1.8                            | 4.7                          | 1.4                           | -1.6                          | 0.21807         |
| Cbl          | 7.5                           | 0.4                            | 4.1                          | 0.2                           | -1.8                          | 0.00007         |
| Zbtb44       | 7.4                           | 0.8                            | 5.8                          | 0.3                           | -1.3                          | 0.10144         |
| Fbn1         | 7.4                           | 1.0                            | 1.2                          | 0.2                           | -6.0                          | 0.00138         |
| Tnpo1        | 7.3                           | 0.4                            | 3.9                          | 0.3                           | -1.9                          | 0.00013         |
| Alg10b       | 7.2                           | 0.7                            | 5.8                          | 0.3                           | -1.3                          | 0.09919         |
| Cbx5         | 7.2                           | 1.0                            | 4.7                          | 0.2                           | -1.5                          | 0.06179         |
| Col5a2       | 7.2                           | 1.4                            | 0.6                          | 0.1                           | -11.9                         | 0.00554         |
| Mtap1b       | 7.1                           | 0.9                            | 1.7                          | 0.2                           | -4.2                          | 0.00185         |
| Rest         | 7.0                           | 0.6                            | 4.7                          | 0.2                           | -1.5                          | 0.00825         |
| Mgat5        | 6.9                           | 0.8                            | 3.6                          | 0.3                           | -1.9                          | 0.00565         |
| Zswim6       | 6.9                           | 0.8                            | 3.1                          | 0.3                           | -2.2                          | 0.00400         |
| Col8a1       | 6.8                           | 1.2                            | 0.6                          | 0.1                           | -11.8                         | 0.00387         |
| Lrrc58       | 6.7                           | 0.5                            | 3.5                          | 0.2                           | -1.9                          | 0.00088         |
| Enc1         | 6.7                           | 2.7                            | 3.3                          | 0.5                           | -2.0                          | 0.26874         |
| Hist1h4f     | 6.7                           | 1.3                            | 1.4                          | 0.2                           | -4.9                          | 0.00775         |
| Btbd7        | 6.7                           | 0.6                            | 4.0                          | 0.2                           | -1.6                          | 0.00818         |
| Gna13        | 6.6                           | 0.9                            | 3.2                          | 0.3                           | -2.0                          | 0.01486         |
| Atp13a3      | 6.6                           | 0.8                            | 2.6                          | 0.2                           | -2.5                          | 0.00386         |
| Mtmt6        | 6.5                           | 0.7                            | 3.1                          | 0.2                           | -2.1                          | 0.00452         |

|           |     |     |     |     |       |         |
|-----------|-----|-----|-----|-----|-------|---------|
| Fam198b   | 6.5 | 0.9 | 1.5 | 0.2 | -4.3  | 0.00210 |
| Thbs4     | 6.4 | 1.8 | 0.9 | 0.2 | -7.4  | 0.02644 |
| Tacc1     | 6.3 | 0.6 | 3.3 | 0.2 | -1.9  | 0.00293 |
| Fndc1     | 6.2 | 1.6 | 0.6 | 0.1 | -10.4 | 0.01866 |
| Eif2c2    | 6.2 | 0.6 | 3.8 | 0.1 | -1.7  | 0.00829 |
| Atxn1l    | 6.2 | 1.0 | 2.7 | 0.2 | -2.3  | 0.01727 |
| Nufip2    | 6.2 | 0.3 | 3.4 | 0.3 | -1.8  | 0.00009 |
| Reep3     | 6.2 | 0.4 | 2.4 | 0.2 | -2.6  | 0.00002 |
| Stc1      | 6.2 | 2.0 | 2.2 | 0.5 | -2.8  | 0.10077 |
| Tgfb2     | 6.1 | 1.4 | 0.9 | 0.2 | -6.5  | 0.01347 |
| Sesn3     | 6.1 | 0.6 | 3.5 | 0.3 | -1.7  | 0.00601 |
| Ptprb     | 6.1 | 1.1 | 2.4 | 0.2 | -2.5  | 0.01814 |
| Fndc3b    | 6.1 | 0.5 | 3.0 | 0.2 | -2.0  | 0.00129 |
| Slc23a2   | 6.0 | 0.6 | 2.6 | 0.4 | -2.3  | 0.00091 |
| Dpysl3    | 6.0 | 1.1 | 1.2 | 0.2 | -4.9  | 0.00636 |
| Serpina3n | 6.0 | 3.3 | 1.0 | 0.2 | -6.3  | 0.18392 |
| Col3a1    | 5.9 | 1.3 | 0.7 | 0.1 | -9.0  | 0.00973 |
| Ddi2      | 5.8 | 0.6 | 3.9 | 0.2 | -1.5  | 0.01824 |
| Atxn1     | 5.8 | 0.8 | 3.3 | 0.2 | -1.8  | 0.02285 |
| Prcp      | 5.6 | 1.1 | 1.0 | 0.2 | -5.7  | 0.00837 |
| Itga1     | 5.6 | 0.6 | 2.0 | 0.2 | -2.8  | 0.00125 |
| Nucks1    | 5.6 | 0.4 | 3.6 | 0.1 | -1.6  | 0.00288 |
| Dcun1d3   | 5.6 | 0.7 | 2.6 | 0.2 | -2.1  | 0.00527 |
| Sulf1     | 5.5 | 0.7 | 1.6 | 0.1 | -3.5  | 0.00152 |
| Rell1     | 5.5 | 1.0 | 1.2 | 0.2 | -4.7  | 0.00636 |
| Abhd2     | 5.5 | 0.7 | 2.4 | 0.2 | -2.2  | 0.00672 |
| Slc38a1   | 5.4 | 0.7 | 3.9 | 0.4 | -1.4  | 0.09866 |
| Arid5b    | 5.4 | 0.6 | 3.0 | 0.3 | -1.8  | 0.00614 |
| Elf4      | 5.4 | 0.7 | 1.5 | 0.2 | -3.6  | 0.00146 |
| Man2a1    | 5.4 | 0.6 | 1.8 | 0.1 | -2.9  | 0.00259 |
| Loxl2     | 5.3 | 1.0 | 0.6 | 0.1 | -8.6  | 0.00464 |
| Lrp6      | 5.3 | 0.5 | 3.8 | 0.2 | -1.4  | 0.02919 |
| Rnf111    | 5.3 | 0.5 | 3.2 | 0.2 | -1.6  | 0.00442 |
| Rassf2    | 5.3 | 0.6 | 1.2 | 0.2 | -4.5  | 0.00108 |
| Chsy1     | 5.2 | 0.7 | 2.9 | 0.3 | -1.8  | 0.01579 |
| Pten      | 5.2 | 0.5 | 3.3 | 0.1 | -1.6  | 0.01257 |
| Ammecr1l  | 5.2 | 0.6 | 2.9 | 0.2 | -1.8  | 0.00986 |
| Cpeb2     | 5.2 | 0.8 | 4.1 | 0.5 | -1.3  | 0.29479 |
| Cggbp1    | 5.2 | 0.8 | 3.1 | 0.3 | -1.7  | 0.04116 |
| Rbm15     | 5.2 | 0.5 | 3.0 | 0.3 | -1.7  | 0.00703 |
| Cpsf6     | 5.1 | 0.3 | 3.1 | 0.2 | -1.6  | 0.00093 |

|          |     |     |     |     |       |         |
|----------|-----|-----|-----|-----|-------|---------|
| Sbno1    | 5.1 | 0.5 | 3.5 | 0.3 | -1.5  | 0.03237 |
| Zfp568   | 5.1 | 0.6 | 2.6 | 0.2 | -1.9  | 0.00562 |
| Pik3r3   | 5.1 | 0.9 | 2.2 | 0.2 | -2.3  | 0.02164 |
| Otud4    | 5.1 | 0.3 | 3.8 | 0.2 | -1.4  | 0.00713 |
| Scd2     | 5.1 | 1.1 | 1.6 | 0.2 | -3.1  | 0.02646 |
| Ccnd2    | 5.1 | 0.6 | 2.3 | 0.2 | -2.3  | 0.00384 |
| Ankfy1   | 5.1 | 0.6 | 2.3 | 0.1 | -2.2  | 0.00626 |
| Arhgap18 | 5.1 | 0.5 | 2.0 | 0.3 | -2.5  | 0.00098 |
| Etnk1    | 5.1 | 0.4 | 3.5 | 0.1 | -1.4  | 0.01182 |
| Parp14   | 5.1 | 0.6 | 1.8 | 0.3 | -2.8  | 0.00103 |
| Adam10   | 5.1 | 0.8 | 2.2 | 0.1 | -2.3  | 0.01156 |
| Stk35    | 5.1 | 0.6 | 2.9 | 0.2 | -1.7  | 0.01412 |
| Gpc6     | 5.0 | 1.0 | 1.1 | 0.1 | -4.6  | 0.00966 |
| Sfrp1    | 5.0 | 1.2 | 1.3 | 0.1 | -4.0  | 0.02371 |
| Pds5a    | 5.0 | 0.4 | 3.4 | 0.3 | -1.5  | 0.00691 |
| Abl2     | 5.0 | 0.6 | 3.0 | 0.1 | -1.7  | 0.02520 |
| Afap1    | 4.9 | 0.5 | 2.7 | 0.1 | -1.8  | 0.00691 |
| Aplnr    | 4.9 | 1.7 | 1.1 | 0.3 | -4.6  | 0.07145 |
| Osmr     | 4.9 | 1.3 | 2.1 | 0.2 | -2.4  | 0.08360 |
| Ptch1    | 4.9 | 0.6 | 3.4 | 0.4 | -1.4  | 0.05860 |
| Creb3l2  | 4.9 | 0.6 | 1.9 | 0.2 | -2.5  | 0.00385 |
| Col1a1   | 4.9 | 1.0 | 0.4 | 0.1 | -10.8 | 0.00773 |
| Cd93     | 4.8 | 0.6 | 1.6 | 0.1 | -3.1  | 0.00242 |
| Il6st    | 4.8 | 0.4 | 2.9 | 0.2 | -1.7  | 0.00476 |
| Elovl5   | 4.8 | 0.5 | 2.6 | 0.2 | -1.9  | 0.00267 |
| Tm9sf3   | 4.8 | 0.5 | 2.4 | 0.1 | -2.0  | 0.00501 |
| Rbm14    | 4.8 | 0.6 | 2.7 | 0.2 | -1.8  | 0.01894 |
| Aak1     | 4.8 | 0.5 | 3.1 | 0.3 | -1.6  | 0.01441 |
| Lats1    | 4.8 | 0.4 | 2.5 | 0.1 | -1.9  | 0.00075 |
| Birc6    | 4.8 | 0.5 | 3.2 | 0.1 | -1.5  | 0.02033 |
| Hmbox1   | 4.8 | 0.4 | 3.1 | 0.2 | -1.5  | 0.00562 |
| Gsk3b    | 4.7 | 0.5 | 3.1 | 0.1 | -1.5  | 0.01659 |
| Jag1     | 4.7 | 0.7 | 2.5 | 0.4 | -1.9  | 0.02416 |
| Fgl2     | 4.7 | 0.9 | 1.5 | 0.2 | -3.2  | 0.01535 |
| Gpr17    | 4.7 | 0.6 | 3.4 | 0.1 | -1.4  | 0.10146 |
| Appbp2   | 4.7 | 0.6 | 3.3 | 0.2 | -1.4  | 0.09142 |
| Itpr12   | 4.7 | 0.9 | 2.1 | 0.3 | -2.2  | 0.02905 |
| Cpd      | 4.7 | 0.4 | 2.1 | 0.3 | -2.2  | 0.00090 |
| Gatad2b  | 4.7 | 0.4 | 3.5 | 0.3 | -1.3  | 0.05503 |
| Klf7     | 4.7 | 0.4 | 2.5 | 0.2 | -1.9  | 0.00328 |
| Ell2     | 4.7 | 0.9 | 2.9 | 0.2 | -1.6  | 0.09862 |

|           |     |     |     |     |      |         |
|-----------|-----|-----|-----|-----|------|---------|
| Tead1     | 4.6 | 0.3 | 3.2 | 0.1 | -1.4 | 0.00409 |
| Mdfic     | 4.6 | 0.5 | 2.0 | 0.3 | -2.3 | 0.00250 |
| Egr3      | 4.6 | 1.5 | 0.7 | 0.1 | -7.0 | 0.04970 |
| Mapk1ip1l | 4.6 | 0.5 | 2.5 | 0.1 | -1.8 | 0.00711 |
| Eif2ak3   | 4.6 | 0.7 | 2.0 | 0.2 | -2.3 | 0.01394 |
| Qser1     | 4.6 | 0.3 | 3.5 | 0.2 | -1.3 | 0.01569 |
| Ppm1e     | 4.6 | 0.7 | 2.2 | 0.4 | -2.1 | 0.01947 |
| Dcaf12    | 4.6 | 0.5 | 2.8 | 0.2 | -1.6 | 0.00984 |
| Pdzd8     | 4.6 | 0.4 | 3.1 | 0.1 | -1.5 | 0.00690 |
| Map3k1    | 4.6 | 0.5 | 3.0 | 0.4 | -1.5 | 0.03730 |
| N4bp2l2   | 4.6 | 0.9 | 1.4 | 0.2 | -3.2 | 0.01342 |
| Man1a2    | 4.6 | 0.4 | 2.6 | 0.2 | -1.8 | 0.00282 |
| Cmtm4     | 4.6 | 0.4 | 3.3 | 0.2 | -1.4 | 0.01510 |
| Sp1       | 4.6 | 0.3 | 3.0 | 0.2 | -1.5 | 0.00262 |
| Ptgfrn    | 4.6 | 0.7 | 1.2 | 0.1 | -4.0 | 0.00453 |
| Hivep1    | 4.6 | 0.5 | 2.6 | 0.2 | -1.8 | 0.01132 |
| Nras      | 4.6 | 0.5 | 2.2 | 0.2 | -2.1 | 0.00321 |
| Mapk6     | 4.6 | 0.5 | 2.9 | 0.1 | -1.6 | 0.01929 |
| Tnks      | 4.6 | 0.4 | 2.4 | 0.1 | -1.9 | 0.00227 |
| Zfp516    | 4.6 | 0.5 | 2.0 | 0.2 | -2.2 | 0.00341 |
| Spry4     | 4.5 | 0.7 | 2.0 | 0.1 | -2.2 | 0.01717 |
| Impad1    | 4.5 | 0.2 | 3.0 | 0.2 | -1.5 | 0.00031 |
| Ets1      | 4.5 | 0.5 | 1.7 | 0.2 | -2.7 | 0.00201 |
| Adam19    | 4.5 | 0.4 | 1.4 | 0.2 | -3.2 | 0.00012 |
| Eif2c1    | 4.5 | 0.5 | 2.5 | 0.3 | -1.8 | 0.00833 |
| Dcaf7     | 4.5 | 0.4 | 2.8 | 0.1 | -1.6 | 0.01023 |
| Lgals3bp  | 4.5 | 0.8 | 0.6 | 0.1 | -8.1 | 0.00495 |
| Pppde1    | 4.5 | 0.6 | 3.0 | 0.3 | -1.5 | 0.05189 |
| Slc6a6    | 4.5 | 0.6 | 2.3 | 0.3 | -2.0 | 0.01081 |
| Rnd3      | 4.5 | 0.4 | 3.0 | 0.2 | -1.5 | 0.01103 |
| Abca1     | 4.5 | 0.6 | 2.2 | 0.3 | -2.0 | 0.01334 |
| Rcor1     | 4.5 | 0.6 | 2.7 | 0.1 | -1.7 | 0.02802 |
| Trim23    | 4.5 | 1.4 | 3.0 | 1.4 | -1.5 | 0.47160 |
| Strn      | 4.5 | 0.3 | 2.9 | 0.2 | -1.5 | 0.00113 |
| Zfp217    | 4.4 | 0.6 | 2.4 | 0.3 | -1.8 | 0.01718 |
| Zfhx3     | 4.4 | 0.6 | 1.8 | 0.1 | -2.4 | 0.00619 |
| Rnf115    | 4.4 | 0.4 | 1.9 | 0.2 | -2.3 | 0.00064 |
| Hist1h4m  | 4.4 | 0.5 | 1.4 | 0.2 | -3.3 | 0.00103 |
| Slc25a37  | 4.4 | 0.7 | 1.6 | 0.3 | -2.7 | 0.00574 |
| Eln       | 4.4 | 1.1 | 1.0 | 0.1 | -4.3 | 0.02652 |
| Cdk17     | 4.4 | 0.4 | 2.0 | 0.3 | -2.3 | 0.00084 |

|               |     |     |     |     |      |         |
|---------------|-----|-----|-----|-----|------|---------|
| Hiatl1        | 4.4 | 0.6 | 2.3 | 0.2 | -1.9 | 0.02018 |
| Rgmb          | 4.4 | 0.4 | 2.5 | 0.3 | -1.7 | 0.00536 |
| Adamts1       | 4.4 | 0.9 | 2.1 | 0.3 | -2.1 | 0.04759 |
| Adamts2       | 4.4 | 0.8 | 0.7 | 0.1 | -5.9 | 0.00751 |
| Tbx20         | 4.4 | 0.3 | 3.0 | 0.1 | -1.4 | 0.00914 |
| Sh3d19        | 4.4 | 0.4 | 1.7 | 0.1 | -2.5 | 0.00125 |
| CH36-125B10.3 | 4.3 | 1.1 | 1.6 | 0.2 | -2.7 | 0.05857 |
| Dcp1a         | 4.3 | 0.5 | 2.5 | 0.1 | -1.7 | 0.01220 |
| Nr1d2         | 4.3 | 0.8 | 3.1 | 0.3 | -1.4 | 0.18348 |
| Lrrc8b        | 4.3 | 0.3 | 1.8 | 0.1 | -2.4 | 0.00067 |
| Mbnl1         | 4.3 | 0.2 | 3.2 | 0.1 | -1.4 | 0.00180 |
| Uck2          | 4.3 | 1.0 | 1.1 | 0.2 | -3.8 | 0.02805 |
| Atrnl1        | 4.3 | 0.3 | 2.6 | 0.2 | -1.6 | 0.00284 |
| Serpine1      | 4.3 | 1.4 | 1.5 | 0.2 | -2.9 | 0.10651 |
| Cdr2l         | 4.3 | 0.6 | 1.1 | 0.1 | -4.1 | 0.00221 |
| Arl6ip1       | 4.3 | 0.6 | 1.7 | 0.1 | -2.6 | 0.00607 |
| Prkaa1        | 4.3 | 0.3 | 3.0 | 0.2 | -1.4 | 0.00471 |
| Arid2         | 4.3 | 0.2 | 3.1 | 0.2 | -1.4 | 0.00368 |
| Col5a1        | 4.3 | 0.8 | 0.5 | 0.1 | -8.6 | 0.00415 |
| Igf1r         | 4.2 | 0.6 | 2.2 | 0.2 | -2.0 | 0.02046 |
| Vps4b         | 4.2 | 0.6 | 2.4 | 0.2 | -1.8 | 0.03029 |
| Eeal          | 4.2 | 0.4 | 2.3 | 0.2 | -1.8 | 0.00174 |
| Adam9         | 4.2 | 0.6 | 1.8 | 0.2 | -2.3 | 0.01195 |
| Ddr2          | 4.2 | 0.6 | 1.8 | 0.1 | -2.4 | 0.00728 |
| Wwp1          | 4.2 | 0.5 | 3.0 | 0.1 | -1.4 | 0.06899 |
| Nipbl         | 4.2 | 0.2 | 3.0 | 0.2 | -1.4 | 0.00221 |
| Mtpn          | 4.2 | 0.5 | 1.7 | 0.1 | -2.4 | 0.00314 |
| Tnfrsf1b      | 4.2 | 0.5 | 1.4 | 0.3 | -2.9 | 0.00240 |
| Alox5ap       | 4.2 | 1.5 | 1.1 | 0.5 | -3.8 | 0.10180 |
| Tmtc1         | 4.2 | 0.5 | 2.6 | 0.1 | -1.6 | 0.01608 |
| Nsd1          | 4.2 | 0.5 | 2.9 | 0.2 | -1.4 | 0.05462 |
| Socs3         | 4.2 | 1.3 | 0.6 | 0.2 | -6.5 | 0.04661 |
| Nid1          | 4.2 | 0.5 | 1.4 | 0.1 | -2.9 | 0.00126 |
| Socs5         | 4.2 | 0.5 | 2.9 | 0.2 | -1.5 | 0.03986 |
| Tnks2         | 4.2 | 0.4 | 3.1 | 0.2 | -1.3 | 0.04037 |
| Efna5         | 4.1 | 0.3 | 2.5 | 0.3 | -1.7 | 0.00195 |
| Spcs3         | 4.1 | 0.5 | 1.6 | 0.1 | -2.6 | 0.00411 |
| Chd1          | 4.1 | 0.4 | 2.2 | 0.2 | -1.9 | 0.00267 |
| Nab1          | 4.1 | 0.7 | 2.0 | 0.2 | -2.1 | 0.02699 |
| Hipl          | 4.1 | 0.5 | 1.9 | 0.1 | -2.2 | 0.00734 |
| Anpep         | 4.1 | 1.0 | 2.2 | 0.7 | -1.9 | 0.14923 |

|          |     |     |     |     |      |         |
|----------|-----|-----|-----|-----|------|---------|
| Fosl2    | 4.1 | 0.9 | 1.7 | 0.1 | -2.4 | 0.04677 |
| Rad54l2  | 4.1 | 0.4 | 2.5 | 0.2 | -1.7 | 0.01179 |
| Pja2     | 4.1 | 0.3 | 3.2 | 0.2 | -1.3 | 0.02617 |
| Prrg3    | 4.1 | 0.4 | 1.4 | 0.2 | -2.9 | 0.00088 |
| Gcnt1    | 4.1 | 0.5 | 3.1 | 0.4 | -1.3 | 0.13119 |
| Dnajc3   | 4.1 | 0.3 | 2.7 | 0.2 | -1.5 | 0.00368 |
| Akap10   | 4.1 | 0.3 | 1.9 | 0.2 | -2.2 | 0.00006 |
| Arhgef12 | 4.1 | 0.4 | 2.6 | 0.2 | -1.6 | 0.01209 |
| Pak2     | 4.1 | 0.4 | 2.3 | 0.1 | -1.8 | 0.00850 |
| Ankrd1   | 4.1 | 0.6 | 0.5 | 0.1 | -8.0 | 0.00132 |
| Pafah1b2 | 4.1 | 0.4 | 2.3 | 0.1 | -1.8 | 0.00362 |
| Jarid2   | 4.1 | 0.5 | 2.4 | 0.2 | -1.7 | 0.01928 |
| Bzw1     | 4.1 | 0.3 | 2.0 | 0.1 | -2.0 | 0.00120 |
| Ptpn14   | 4.1 | 0.4 | 2.5 | 0.2 | -1.6 | 0.00917 |
| Atp6v1a  | 4.1 | 0.6 | 2.4 | 0.2 | -1.7 | 0.03829 |
| Slk      | 4.1 | 0.3 | 2.2 | 0.1 | -1.8 | 0.00116 |
| Bmpr1a   | 4.1 | 0.3 | 3.0 | 0.1 | -1.4 | 0.01420 |
| Snx27    | 4.0 | 0.3 | 3.0 | 0.2 | -1.3 | 0.01675 |
| Scd1     | 4.0 | 0.7 | 3.1 | 0.4 | -1.3 | 0.24647 |
| Arsb     | 4.0 | 0.6 | 1.0 | 0.1 | -4.1 | 0.00263 |
| Atf7     | 4.0 | 0.4 | 3.0 | 0.1 | -1.3 | 0.04422 |
| Klh9     | 4.0 | 0.2 | 2.9 | 0.2 | -1.4 | 0.00083 |
| Rbm27    | 4.0 | 0.3 | 2.4 | 0.1 | -1.6 | 0.00077 |
| Adamts5  | 4.0 | 0.6 | 2.6 | 0.4 | -1.6 | 0.08663 |
| Pdcd10   | 4.0 | 0.8 | 3.2 | 0.6 | -1.3 | 0.42078 |
| Apc      | 4.0 | 0.3 | 2.8 | 0.2 | -1.4 | 0.01096 |
| Nupl1    | 4.0 | 0.5 | 2.6 | 0.2 | -1.5 | 0.03103 |
| Fibin    | 4.0 | 0.4 | 0.9 | 0.1 | -4.5 | 0.00067 |
| Lifr     | 4.0 | 0.2 | 5.5 | 0.6 | 1.4  | 0.06530 |
| Adcy7    | 4.0 | 0.7 | 0.6 | 0.1 | -6.7 | 0.00321 |
| Fnip1    | 4.0 | 0.2 | 2.8 | 0.2 | -1.4 | 0.00039 |
| Cyr61    | 4.0 | 0.6 | 1.5 | 0.1 | -2.6 | 0.00825 |
| Egr1     | 4.0 | 0.8 | 2.0 | 0.4 | -2.0 | 0.06997 |
| Slc39a9  | 4.0 | 0.5 | 2.5 | 0.2 | -1.6 | 0.02929 |
| Arhgap32 | 3.9 | 0.5 | 2.0 | 0.2 | -2.0 | 0.00642 |
| Cebpg    | 3.9 | 0.6 | 1.4 | 0.1 | -2.9 | 0.01013 |
| Fos      | 3.9 | 1.3 | 2.0 | 0.9 | -2.0 | 0.25254 |
| Gjal     | 3.9 | 0.3 | 2.9 | 0.2 | -1.4 | 0.03691 |
| Zbtb46   | 3.9 | 0.6 | 2.2 | 0.3 | -1.8 | 0.02456 |
| Bach1    | 3.9 | 0.5 | 2.7 | 0.2 | -1.5 | 0.05179 |
| Zcchc2   | 3.9 | 0.5 | 2.0 | 0.2 | -2.0 | 0.00648 |

|           |     |     |     |     |      |         |
|-----------|-----|-----|-----|-----|------|---------|
| Ppargc1b  | 3.9 | 0.3 | 3.0 | 0.2 | -1.3 | 0.02583 |
| Pdgfra    | 3.9 | 0.3 | 2.2 | 0.2 | -1.7 | 0.00224 |
| Samd8     | 3.9 | 0.5 | 2.4 | 0.1 | -1.6 | 0.02747 |
| Ptplad1   | 3.9 | 0.4 | 2.9 | 0.1 | -1.4 | 0.04200 |
| Dicer1    | 3.9 | 0.4 | 2.5 | 0.2 | -1.6 | 0.01660 |
| Shroom4   | 3.9 | 0.6 | 2.2 | 0.2 | -1.8 | 0.02411 |
| Cfh       | 3.9 | 0.5 | 3.0 | 0.3 | -1.3 | 0.16904 |
| Ccnt1     | 3.9 | 0.3 | 2.4 | 0.1 | -1.6 | 0.00528 |
| F2r       | 3.9 | 0.4 | 1.2 | 0.1 | -3.1 | 0.00121 |
| Klf3      | 3.9 | 0.4 | 2.1 | 0.1 | -1.8 | 0.00937 |
| Zc3hav1   | 3.9 | 0.4 | 1.3 | 0.1 | -2.9 | 0.00201 |
| Lrrc8c    | 3.9 | 0.7 | 1.6 | 0.2 | -2.4 | 0.01930 |
| Zbtb39    | 3.9 | 0.4 | 2.8 | 0.2 | -1.4 | 0.04455 |
| Nbas      | 3.9 | 0.3 | 2.8 | 0.2 | -1.4 | 0.02988 |
| Plk2      | 3.8 | 0.7 | 1.2 | 0.2 | -3.1 | 0.01603 |
| Plxna4    | 3.8 | 0.5 | 2.3 | 0.5 | -1.7 | 0.05945 |
| Nup153    | 3.8 | 0.4 | 2.3 | 0.1 | -1.7 | 0.01561 |
| Farp1     | 3.8 | 0.6 | 1.2 | 0.1 | -3.3 | 0.00539 |
| C3        | 3.8 | 0.9 | 1.4 | 0.2 | -2.7 | 0.04942 |
| Matn2     | 3.8 | 0.8 | 0.7 | 0.1 | -5.3 | 0.00988 |
| Utrn      | 3.8 | 0.5 | 2.4 | 0.2 | -1.6 | 0.03232 |
| Kirrel    | 3.8 | 0.6 | 1.2 | 0.1 | -3.1 | 0.00849 |
| Dip2b     | 3.8 | 0.5 | 2.2 | 0.1 | -1.7 | 0.02073 |
| Snx18     | 3.8 | 0.4 | 2.2 | 0.1 | -1.8 | 0.00445 |
| Btg2      | 3.8 | 0.8 | 2.2 | 0.4 | -1.7 | 0.12983 |
| Wdr82     | 3.8 | 0.4 | 2.1 | 0.1 | -1.8 | 0.00404 |
| Iqgap1    | 3.8 | 0.4 | 1.2 | 0.1 | -3.2 | 0.00157 |
| Mast4     | 3.8 | 0.3 | 2.3 | 0.2 | -1.7 | 0.00405 |
| Cyfip1    | 3.8 | 0.4 | 1.8 | 0.1 | -2.1 | 0.00420 |
| Emp1      | 3.8 | 0.5 | 0.6 | 0.1 | -6.9 | 0.00084 |
| Gnaq      | 3.8 | 0.3 | 2.1 | 0.2 | -1.8 | 0.00254 |
| B4galt1   | 3.8 | 0.4 | 2.2 | 0.1 | -1.7 | 0.01403 |
| Mll3      | 3.8 | 0.4 | 3.0 | 0.2 | -1.3 | 0.10791 |
| Fam160b1  | 3.8 | 0.4 | 2.3 | 0.2 | -1.7 | 0.00895 |
| Cttnbp2nl | 3.8 | 0.6 | 1.3 | 0.1 | -3.0 | 0.01008 |
| Eaf1      | 3.8 | 0.5 | 1.9 | 0.2 | -2.0 | 0.01436 |
| Notch2    | 3.8 | 0.3 | 2.4 | 0.1 | -1.6 | 0.00511 |
| Ube3a     | 3.7 | 0.2 | 2.5 | 0.2 | -1.5 | 0.00026 |
| Tjp1      | 3.7 | 0.5 | 2.6 | 0.2 | -1.4 | 0.06556 |
| Sacm1l    | 3.7 | 0.3 | 3.0 | 0.2 | -1.3 | 0.05534 |
| Tmcc1     | 3.7 | 0.5 | 2.5 | 0.1 | -1.5 | 0.05042 |

|          |     |     |     |     |      |         |
|----------|-----|-----|-----|-----|------|---------|
| Itga9    | 3.7 | 0.8 | 1.1 | 0.1 | -3.4 | 0.02148 |
| Dyrk2    | 3.7 | 0.4 | 2.4 | 0.2 | -1.6 | 0.01709 |
| Hivep2   | 3.7 | 0.4 | 2.4 | 0.2 | -1.5 | 0.01719 |
| Mapre1   | 3.7 | 0.4 | 2.1 | 0.2 | -1.8 | 0.00557 |
| Tgoln2   | 3.7 | 0.3 | 2.6 | 0.1 | -1.4 | 0.01459 |
| Nynrin   | 3.7 | 0.3 | 1.4 | 0.1 | -2.7 | 0.00016 |
| Ccdc80   | 3.7 | 0.5 | 1.1 | 0.1 | -3.4 | 0.00297 |
| Stk4     | 3.7 | 0.5 | 2.3 | 0.2 | -1.6 | 0.03882 |
| Atf7ip   | 3.7 | 0.5 | 2.7 | 0.2 | -1.4 | 0.11056 |
| Rbbp5    | 3.7 | 0.4 | 2.7 | 0.1 | -1.3 | 0.06882 |
| Cav2     | 3.7 | 0.3 | 2.1 | 0.1 | -1.8 | 0.00210 |
| Akap12   | 3.7 | 0.6 | 1.4 | 0.1 | -2.6 | 0.01039 |
| Sec23a   | 3.7 | 0.2 | 2.9 | 0.1 | -1.3 | 0.01494 |
| Cbll1    | 3.6 | 0.4 | 2.9 | 0.2 | -1.3 | 0.12248 |
| F13a1    | 3.6 | 0.4 | 1.6 | 0.1 | -2.2 | 0.00405 |
| Lamc1    | 3.6 | 0.4 | 1.3 | 0.1 | -2.9 | 0.00117 |
| Fnip2    | 3.6 | 0.3 | 2.6 | 0.3 | -1.4 | 0.03307 |
| Nmt2     | 3.6 | 0.5 | 1.7 | 0.1 | -2.1 | 0.01208 |
| Zfp84    | 3.6 | 0.2 | 2.5 | 0.1 | -1.5 | 0.00039 |
| Trip12   | 3.6 | 0.3 | 2.7 | 0.1 | -1.3 | 0.03064 |
| Pros1    | 3.6 | 0.4 | 1.4 | 0.1 | -2.6 | 0.00268 |
| Ikzf5    | 3.6 | 0.4 | 2.8 | 0.2 | -1.3 | 0.13264 |
| Slc38a2  | 3.6 | 0.5 | 1.8 | 0.1 | -2.1 | 0.00839 |
| Slc33a1  | 3.6 | 0.4 | 2.1 | 0.1 | -1.7 | 0.00774 |
| Rap1gds1 | 3.6 | 1.0 | 1.8 | 0.2 | -2.0 | 0.12333 |
| Pggt1b   | 3.6 | 0.5 | 2.0 | 0.2 | -1.8 | 0.01792 |
| Cpm      | 3.6 | 0.6 | 1.7 | 0.2 | -2.1 | 0.01780 |
| Fam13a   | 3.6 | 0.2 | 2.0 | 0.2 | -1.9 | 0.00049 |
| Sdc2     | 3.6 | 0.5 | 1.7 | 0.2 | -2.2 | 0.01381 |
| Pcgf3    | 3.6 | 0.5 | 2.4 | 0.2 | -1.5 | 0.04490 |
| Tbc1d2b  | 3.6 | 0.6 | 1.5 | 0.4 | -2.4 | 0.01494 |
| Irs2     | 3.6 | 1.2 | 1.3 | 0.4 | -2.7 | 0.10983 |
| Tmf1     | 3.6 | 0.4 | 2.4 | 0.2 | -1.5 | 0.02588 |
| Atp2c1   | 3.6 | 0.8 | 2.3 | 0.2 | -1.5 | 0.18672 |
| Actr2    | 3.6 | 0.4 | 1.8 | 0.2 | -2.0 | 0.00701 |
| Ap2b1    | 3.6 | 0.4 | 1.7 | 0.1 | -2.1 | 0.00238 |
| Atf6     | 3.6 | 0.3 | 2.8 | 0.1 | -1.3 | 0.04995 |
| Cand1    | 3.6 | 0.3 | 2.4 | 0.3 | -1.5 | 0.01655 |
| Zbtb43   | 3.6 | 0.5 | 2.8 | 0.3 | -1.3 | 0.27347 |
| Smad7    | 3.6 | 0.5 | 2.2 | 0.2 | -1.6 | 0.04088 |
| Frmd6    | 3.6 | 0.3 | 2.0 | 0.1 | -1.8 | 0.00240 |



|           |     |     |     |     |      |         |
|-----------|-----|-----|-----|-----|------|---------|
| Myo1d     | 3.6 | 0.4 | 1.3 | 0.1 | -2.9 | 0.00241 |
| Hif1a     | 3.6 | 0.6 | 1.7 | 0.2 | -2.2 | 0.01910 |
| Cdv3      | 3.6 | 0.4 | 1.4 | 0.2 | -2.6 | 0.00133 |
| Esyt2     | 3.6 | 0.4 | 1.9 | 0.1 | -1.9 | 0.00749 |
| Cirh1a    | 3.6 | 1.3 | 2.0 | 0.6 | -1.8 | 0.31269 |
| Bat2l2    | 3.6 | 0.4 | 2.2 | 0.1 | -1.6 | 0.02104 |
| Mecp2     | 3.6 | 0.3 | 2.6 | 0.2 | -1.4 | 0.02341 |
| Lclat1    | 3.6 | 0.2 | 2.3 | 0.1 | -1.5 | 0.00126 |
| Cd276     | 3.6 | 0.5 | 1.1 | 0.2 | -3.4 | 0.00351 |
| Rbm4      | 3.6 | 0.6 | 2.7 | 0.3 | -1.3 | 0.23435 |
| Zfp367    | 3.5 | 0.3 | 1.8 | 0.1 | -2.0 | 0.00195 |
| Rnf150    | 3.5 | 0.6 | 2.7 | 0.2 | -1.3 | 0.19956 |
| Wasl      | 3.5 | 0.4 | 2.0 | 0.1 | -1.8 | 0.01108 |
| Wdfy3     | 3.5 | 0.4 | 2.1 | 0.1 | -1.7 | 0.01390 |
| Rnf141    | 3.5 | 0.4 | 2.4 | 0.2 | -1.5 | 0.04220 |
| Cdgap     | 3.5 | 0.4 | 1.8 | 0.1 | -2.0 | 0.00665 |
| Nup50     | 3.5 | 0.3 | 1.8 | 0.1 | -1.9 | 0.00132 |
| Ifnar1    | 3.5 | 0.4 | 1.6 | 0.1 | -2.2 | 0.00690 |
| Stim2     | 3.5 | 0.5 | 1.0 | 0.2 | -3.4 | 0.00192 |
| Zfp148    | 3.5 | 0.2 | 2.7 | 0.3 | -1.3 | 0.06165 |
| Secisbp2l | 3.5 | 0.3 | 2.3 | 0.2 | -1.5 | 0.00949 |
| Znrf2     | 3.5 | 0.5 | 1.9 | 0.1 | -1.9 | 0.02443 |
| Larp4b    | 3.5 | 0.3 | 2.7 | 0.2 | -1.3 | 0.04052 |
| Cmtm6     | 3.5 | 0.4 | 1.8 | 0.1 | -1.9 | 0.01065 |
| Rassf8    | 3.5 | 0.4 | 2.0 | 0.2 | -1.7 | 0.01440 |
| Smcr8     | 3.5 | 0.3 | 2.1 | 0.1 | -1.6 | 0.00692 |
| Nedd9     | 3.5 | 0.3 | 2.2 | 0.2 | -1.6 | 0.00515 |
| Sertad2   | 3.5 | 0.5 | 2.1 | 0.2 | -1.6 | 0.03379 |
| Fam178a   | 3.5 | 0.3 | 2.1 | 0.2 | -1.6 | 0.00202 |
| Lamp2     | 3.5 | 0.4 | 2.2 | 0.0 | -1.6 | 0.01294 |
| Ppp1r15b  | 3.5 | 0.5 | 1.8 | 0.1 | -1.9 | 0.01471 |
| Twsgl     | 3.5 | 0.4 | 2.5 | 0.1 | -1.4 | 0.04296 |
| Ppp1r3b   | 3.5 | 0.4 | 2.5 | 0.3 | -1.4 | 0.10046 |
| Rpl27a    | 3.5 | 0.4 | 2.5 | 0.2 | -1.4 | 0.05274 |
| Rab31     | 3.5 | 0.6 | 1.0 | 0.1 | -3.5 | 0.00798 |
| Ctsc      | 3.5 | 0.8 | 1.1 | 0.2 | -3.1 | 0.02373 |
| Srsf2ip   | 3.5 | 0.2 | 2.5 | 0.1 | -1.4 | 0.00783 |
| Trib2     | 3.5 | 0.3 | 1.8 | 0.2 | -1.9 | 0.00236 |
| Obfc2a    | 3.5 | 0.3 | 1.6 | 0.2 | -2.2 | 0.00071 |
| Elmo1     | 3.5 | 0.4 | 1.3 | 0.1 | -2.6 | 0.00267 |
| Fam63b    | 3.5 | 0.3 | 2.3 | 0.2 | -1.5 | 0.00736 |

|           |     |     |     |     |      |         |
|-----------|-----|-----|-----|-----|------|---------|
| Antxr1    | 3.5 | 0.6 | 1.2 | 0.2 | -2.9 | 0.01052 |
| Lamb1     | 3.5 | 0.4 | 1.2 | 0.1 | -2.9 | 0.00142 |
| Cd200     | 3.5 | 0.8 | 1.9 | 0.3 | -1.8 | 0.10961 |
| Otud1     | 3.5 | 0.9 | 0.6 | 0.0 | -5.5 | 0.02743 |
| Tppp      | 3.5 | 0.5 | 4.4 | 0.6 | 1.3  | 0.24649 |
| Myst3     | 3.5 | 0.4 | 2.4 | 0.1 | -1.5 | 0.02773 |
| She       | 3.5 | 0.4 | 1.6 | 0.1 | -2.1 | 0.00480 |
| Sft2d2    | 3.4 | 0.4 | 2.5 | 0.2 | -1.4 | 0.08509 |
| Ptgs1     | 3.4 | 1.0 | 1.5 | 0.2 | -2.3 | 0.11921 |
| Synpo2l   | 3.4 | 0.5 | 0.7 | 0.1 | -5.0 | 0.00174 |
| Fzd6      | 3.4 | 0.4 | 2.4 | 0.2 | -1.5 | 0.04616 |
| Insr      | 3.4 | 0.2 | 2.6 | 0.2 | -1.3 | 0.01386 |
| Ttyh2     | 3.4 | 0.7 | 0.7 | 0.1 | -5.1 | 0.01274 |
| Rdx       | 3.4 | 0.2 | 2.5 | 0.1 | -1.4 | 0.00937 |
| Fut8      | 3.4 | 0.5 | 2.1 | 0.2 | -1.7 | 0.03618 |
| Mef2c     | 3.4 | 0.4 | 1.9 | 0.1 | -1.8 | 0.00813 |
| Flnb      | 3.4 | 0.3 | 1.0 | 0.1 | -3.6 | 0.00013 |
| Tmem165   | 3.4 | 0.7 | 1.9 | 0.2 | -1.8 | 0.06784 |
| Sh3rf1    | 3.4 | 0.4 | 1.3 | 0.2 | -2.7 | 0.00204 |
| Slc25a30  | 3.4 | 0.3 | 1.9 | 0.2 | -1.8 | 0.00418 |
| Snx13     | 3.4 | 0.4 | 2.4 | 0.1 | -1.4 | 0.03611 |
| Sel1l     | 3.4 | 0.3 | 2.0 | 0.1 | -1.7 | 0.00667 |
| Rap2a     | 3.4 | 0.5 | 1.5 | 0.1 | -2.3 | 0.00905 |
| Marcks    | 3.4 | 0.3 | 0.9 | 0.2 | -3.8 | 0.00008 |
| Zfp532    | 3.4 | 0.4 | 1.8 | 0.2 | -1.9 | 0.01225 |
| Wipf2     | 3.4 | 0.3 | 2.1 | 0.2 | -1.6 | 0.00939 |
| Fam120a   | 3.4 | 0.4 | 2.0 | 0.1 | -1.7 | 0.01296 |
| Arl8a     | 3.4 | 0.5 | 1.6 | 0.2 | -2.1 | 0.01796 |
| Trim44    | 3.4 | 0.5 | 2.0 | 0.0 | -1.7 | 0.03684 |
| Kpna4     | 3.4 | 0.3 | 1.9 | 0.1 | -1.8 | 0.00132 |
| Nfe2l2    | 3.4 | 0.2 | 2.1 | 0.1 | -1.6 | 0.00262 |
| Ppm1f     | 3.4 | 0.4 | 1.1 | 0.1 | -3.0 | 0.00132 |
| Dock1     | 3.4 | 0.4 | 1.5 | 0.1 | -2.3 | 0.00585 |
| Cmklr1    | 3.3 | 0.5 | 1.4 | 0.1 | -2.5 | 0.01244 |
| Erap1     | 3.3 | 0.4 | 2.2 | 0.2 | -1.5 | 0.02778 |
| Hist2h2ac | 3.3 | 0.8 | 1.4 | 0.2 | -2.5 | 0.05494 |
| Gcap14    | 3.3 | 0.3 | 2.3 | 0.1 | -1.5 | 0.01733 |
| Actn1     | 3.3 | 0.5 | 1.0 | 0.1 | -3.2 | 0.00363 |
| Mobkl2a   | 3.3 | 0.7 | 0.7 | 0.1 | -4.8 | 0.01228 |
| Hic1      | 3.3 | 0.7 | 1.2 | 0.3 | -2.8 | 0.02116 |
| Ptp4a1    | 3.3 | 0.5 | 2.3 | 0.3 | -1.4 | 0.13839 |

|          |     |     |     |     |      |         |
|----------|-----|-----|-----|-----|------|---------|
| Col18a1  | 3.3 | 0.6 | 0.4 | 0.1 | -9.3 | 0.00573 |
| Rab18    | 3.3 | 0.2 | 2.4 | 0.1 | -1.4 | 0.00829 |
| Igfbp5   | 3.3 | 0.6 | 1.9 | 0.2 | -1.7 | 0.04969 |
| Trib1    | 3.3 | 0.4 | 1.1 | 0.1 | -3.0 | 0.00182 |
| Prrc1    | 3.3 | 0.5 | 2.1 | 0.2 | -1.6 | 0.03949 |
| Arl5a    | 3.3 | 0.3 | 2.1 | 0.2 | -1.6 | 0.00301 |
| S1pr2    | 3.3 | 0.4 | 1.0 | 0.1 | -3.5 | 0.00245 |
| Pias2    | 3.3 | 0.3 | 2.4 | 0.1 | -1.4 | 0.02339 |
| Col6a2   | 3.3 | 0.6 | 0.6 | 0.1 | -5.6 | 0.00551 |
| Tek      | 3.3 | 0.4 | 1.9 | 0.2 | -1.7 | 0.01613 |
| Spin1    | 3.3 | 0.4 | 1.9 | 0.1 | -1.8 | 0.01896 |
| Rcan3    | 3.3 | 0.7 | 1.5 | 0.2 | -2.2 | 0.03801 |
| Nus1     | 3.3 | 0.3 | 1.8 | 0.1 | -1.8 | 0.00630 |
| Edc3     | 3.3 | 0.4 | 2.0 | 0.2 | -1.6 | 0.02068 |
| Sephs1   | 3.3 | 0.4 | 2.1 | 0.3 | -1.5 | 0.02824 |
| Rnf144b  | 3.3 | 0.3 | 2.2 | 0.2 | -1.5 | 0.01780 |
| Setd2    | 3.3 | 0.3 | 2.1 | 0.1 | -1.6 | 0.00503 |
| Nid2     | 3.3 | 0.4 | 0.5 | 0.0 | -6.1 | 0.00092 |
| Fam49b   | 3.3 | 0.4 | 2.3 | 0.2 | -1.4 | 0.04892 |
| Cramp11  | 3.3 | 0.4 | 2.0 | 0.1 | -1.6 | 0.02562 |
| Ppp1r12a | 3.3 | 0.2 | 2.2 | 0.1 | -1.5 | 0.00285 |
| Zfp828   | 3.3 | 0.4 | 1.7 | 0.1 | -2.0 | 0.01242 |
| Fam114a1 | 3.3 | 0.7 | 1.2 | 0.2 | -2.8 | 0.02314 |
| Tmod3    | 3.3 | 0.3 | 1.3 | 0.1 | -2.5 | 0.00158 |
| Fbxo28   | 3.3 | 0.4 | 2.3 | 0.2 | -1.4 | 0.07606 |
| Lama2    | 3.3 | 0.3 | 1.7 | 0.1 | -1.9 | 0.00562 |
| Gtf3c4   | 3.3 | 0.4 | 1.9 | 0.2 | -1.8 | 0.01732 |
| Pldn     | 3.3 | 0.5 | 2.0 | 0.2 | -1.6 | 0.05615 |
| Fcho2    | 3.2 | 0.2 | 2.5 | 0.2 | -1.3 | 0.03936 |
| Nat12    | 3.2 | 0.4 | 2.0 | 0.3 | -1.7 | 0.02584 |
| Ttpal    | 3.2 | 0.4 | 1.9 | 0.3 | -1.7 | 0.02088 |
| Wapal    | 3.2 | 0.3 | 2.1 | 0.1 | -1.5 | 0.00877 |
| Casq1    | 3.2 | 0.4 | 1.2 | 0.1 | -2.7 | 0.00292 |
| Peli1    | 3.2 | 0.4 | 2.3 | 0.1 | -1.4 | 0.05012 |
| Lbh      | 3.2 | 0.4 | 2.1 | 0.1 | -1.6 | 0.02631 |
| Cmya5    | 3.2 | 0.4 | 4.4 | 0.4 | 1.4  | 0.05160 |
| Ubt2     | 3.2 | 0.6 | 2.0 | 0.2 | -1.6 | 0.12315 |
| Peli2    | 3.2 | 0.5 | 1.9 | 0.3 | -1.7 | 0.04009 |
| Prkx     | 3.2 | 0.2 | 1.8 | 0.1 | -1.8 | 0.00039 |
| Rock2    | 3.2 | 0.2 | 2.4 | 0.1 | -1.3 | 0.01553 |
| Mn1      | 3.2 | 0.4 | 1.2 | 0.1 | -2.7 | 0.00467 |

|             |     |     |     |     |      |         |
|-------------|-----|-----|-----|-----|------|---------|
| Ncoa4       | 3.2 | 0.3 | 2.4 | 0.1 | -1.3 | 0.04204 |
| Mmp14       | 3.2 | 0.7 | 0.6 | 0.1 | -5.0 | 0.01759 |
| Pik3r1      | 3.2 | 0.3 | 4.3 | 0.4 | 1.3  | 0.04198 |
| Ankrd17     | 3.2 | 0.3 | 2.4 | 0.1 | -1.3 | 0.03684 |
| Clec1a      | 3.2 | 0.4 | 1.5 | 0.1 | -2.1 | 0.00843 |
| Snx4        | 3.2 | 0.3 | 2.0 | 0.1 | -1.6 | 0.01315 |
| Frzb        | 3.2 | 0.8 | 0.8 | 0.2 | -3.9 | 0.02862 |
| Nin         | 3.2 | 0.4 | 1.3 | 0.1 | -2.4 | 0.00416 |
| Atxn7l3b    | 3.2 | 0.6 | 1.5 | 0.1 | -2.1 | 0.04376 |
| Lfng        | 3.2 | 0.4 | 0.8 | 0.2 | -4.0 | 0.00090 |
| Slc16a2     | 3.2 | 0.3 | 1.6 | 0.1 | -2.0 | 0.00356 |
| Parva       | 3.2 | 0.4 | 1.6 | 0.1 | -2.0 | 0.00590 |
| Cxcl12      | 3.2 | 0.4 | 2.1 | 0.2 | -1.5 | 0.03759 |
| Trpc3       | 3.2 | 0.6 | 2.1 | 0.3 | -1.5 | 0.14168 |
| Vim         | 3.2 | 0.6 | 0.5 | 0.0 | -6.5 | 0.00510 |
| Nup98       | 3.2 | 0.2 | 2.3 | 0.1 | -1.4 | 0.00817 |
| Dnaja1      | 3.2 | 0.6 | 1.6 | 0.2 | -1.9 | 0.04806 |
| Smad1       | 3.2 | 0.4 | 1.0 | 0.1 | -3.1 | 0.00343 |
| Cbfb        | 3.2 | 0.3 | 1.6 | 0.1 | -2.0 | 0.00452 |
| Plxna2      | 3.1 | 0.4 | 2.0 | 0.1 | -1.6 | 0.05092 |
| Gem         | 3.1 | 0.4 | 1.7 | 0.2 | -1.9 | 0.01660 |
| Bhlhe41     | 3.1 | 0.4 | 1.0 | 0.1 | -3.2 | 0.00275 |
| Cbfa2t2-ps1 | 3.1 | 0.4 | 2.1 | 0.2 | -1.5 | 0.03133 |
| Tomm70a     | 3.1 | 0.2 | 2.4 | 0.1 | -1.3 | 0.02325 |
| Stard9      | 3.1 | 0.9 | 1.0 | 0.1 | -3.2 | 0.05530 |
| Actr3       | 3.1 | 0.4 | 1.8 | 0.1 | -1.7 | 0.01381 |
| Trim56      | 3.1 | 0.3 | 1.7 | 0.1 | -1.8 | 0.00493 |
| Ube2h       | 3.1 | 0.4 | 2.0 | 0.2 | -1.5 | 0.02459 |
| Meox1       | 3.1 | 0.4 | 0.4 | 0.1 | -7.2 | 0.00154 |
| Lum         | 3.1 | 0.7 | 0.8 | 0.1 | -4.0 | 0.01610 |
| Snai1       | 3.1 | 0.6 | 0.8 | 0.1 | -4.1 | 0.01290 |
| Dnajb4      | 3.1 | 0.4 | 1.7 | 0.1 | -1.8 | 0.01156 |
| Sorl1       | 3.1 | 0.4 | 2.4 | 0.2 | -1.3 | 0.17316 |
| Dgkd        | 3.1 | 0.3 | 1.8 | 0.1 | -1.7 | 0.00448 |
| Prelp       | 3.1 | 0.4 | 1.6 | 0.1 | -2.0 | 0.00628 |
| Lanc12      | 3.1 | 0.2 | 2.4 | 0.2 | -1.3 | 0.06659 |
| Usp24       | 3.1 | 0.3 | 2.3 | 0.2 | -1.4 | 0.04337 |
| Crkl        | 3.1 | 0.4 | 1.9 | 0.1 | -1.6 | 0.02280 |
| Nedd4       | 3.1 | 0.3 | 2.1 | 0.1 | -1.5 | 0.01209 |
| Stxbp3a     | 3.1 | 0.6 | 2.3 | 0.3 | -1.3 | 0.31012 |
| Cep120      | 3.1 | 0.3 | 2.0 | 0.1 | -1.6 | 0.01218 |

|         |     |     |     |     |      |         |
|---------|-----|-----|-----|-----|------|---------|
| Dusp5   | 3.1 | 0.7 | 2.4 | 0.2 | -1.3 | 0.37906 |
| Thrb    | 3.1 | 0.2 | 4.3 | 0.2 | 1.4  | 0.00386 |
| Dnmt3a  | 3.1 | 0.4 | 2.3 | 0.1 | -1.3 | 0.11793 |
| Serinc5 | 3.1 | 0.3 | 1.6 | 0.1 | -1.9 | 0.00216 |
| Kcnj2   | 3.1 | 0.4 | 5.0 | 0.6 | 1.6  | 0.02894 |
| Magi1   | 3.1 | 0.3 | 1.7 | 0.1 | -1.8 | 0.00593 |
| Tbl1x   | 3.1 | 0.3 | 2.2 | 0.1 | -1.4 | 0.02546 |
| Per3    | 3.1 | 1.0 | 1.1 | 0.2 | -2.8 | 0.11716 |
| Ptpm    | 3.1 | 0.3 | 2.1 | 0.1 | -1.5 | 0.03219 |
| Sptlc2  | 3.1 | 0.5 | 1.2 | 0.1 | -2.6 | 0.00827 |
| Leprel1 | 3.1 | 1.0 | 1.2 | 0.1 | -2.6 | 0.12710 |
| Zfp521  | 3.1 | 0.5 | 2.2 | 0.2 | -1.4 | 0.16180 |
| Nuak1   | 3.1 | 0.6 | 0.8 | 0.1 | -3.9 | 0.00899 |
| Pdia4   | 3.1 | 0.3 | 1.2 | 0.1 | -2.5 | 0.00208 |
| Nek7    | 3.1 | 0.3 | 2.4 | 0.1 | -1.3 | 0.09947 |
| Pkd2    | 3.1 | 0.3 | 1.3 | 0.1 | -2.4 | 0.00248 |
| Nhlrc2  | 3.0 | 0.2 | 2.4 | 0.2 | -1.3 | 0.05001 |
| Fli1    | 3.0 | 0.3 | 1.3 | 0.1 | -2.4 | 0.00114 |
| Igdcc4  | 3.0 | 0.5 | 2.1 | 0.2 | -1.4 | 0.11443 |
| Rnf145  | 3.0 | 0.5 | 1.2 | 0.2 | -2.5 | 0.01042 |
| Gucy1a3 | 3.0 | 0.3 | 1.9 | 0.2 | -1.6 | 0.01681 |
| Zfc3h1  | 3.0 | 0.5 | 1.4 | 0.1 | -2.1 | 0.01566 |
| Plod2   | 3.0 | 0.3 | 1.7 | 0.2 | -1.8 | 0.00493 |
| Hcfc2   | 3.0 | 0.3 | 2.4 | 0.1 | -1.3 | 0.13262 |
| Zfp36l2 | 3.0 | 0.4 | 0.8 | 0.1 | -3.8 | 0.00334 |
| Slc36a1 | 3.0 | 0.4 | 1.7 | 0.1 | -1.8 | 0.01801 |
| Ptpn12  | 3.0 | 0.5 | 1.2 | 0.1 | -2.4 | 0.01282 |
| Hbegf   | 3.0 | 0.6 | 0.6 | 0.0 | -5.4 | 0.00714 |
| Tnrc6a  | 3.0 | 0.4 | 2.4 | 0.2 | -1.3 | 0.14893 |
| Rnf19a  | 3.0 | 0.3 | 1.5 | 0.1 | -2.1 | 0.00133 |
| Katnal1 | 3.0 | 1.4 | 2.1 | 0.5 | -1.4 | 0.58789 |
| Rgl1    | 3.0 | 0.4 | 1.4 | 0.2 | -2.1 | 0.00771 |
| Map4k3  | 3.0 | 0.2 | 2.3 | 0.2 | -1.3 | 0.04029 |
| Syncrip | 3.0 | 0.3 | 2.0 | 0.1 | -1.5 | 0.01796 |
| Ndst1   | 3.0 | 0.4 | 2.1 | 0.1 | -1.4 | 0.06019 |
| Asap2   | 3.0 | 0.4 | 0.7 | 0.2 | -4.0 | 0.00123 |
| Plxdc2  | 3.0 | 0.2 | 1.6 | 0.1 | -1.9 | 0.00046 |
| Grk5    | 3.0 | 0.5 | 1.8 | 0.2 | -1.7 | 0.05444 |
| Per2    | 3.0 | 0.6 | 0.8 | 0.1 | -3.5 | 0.01712 |
| Fzd1    | 3.0 | 0.5 | 1.1 | 0.1 | -2.8 | 0.01025 |
| Pgam1   | 3.0 | 0.5 | 2.1 | 0.2 | -1.4 | 0.12856 |

|           |     |     |     |     |      |         |
|-----------|-----|-----|-----|-----|------|---------|
| Shoc2     | 3.0 | 0.3 | 1.8 | 0.1 | -1.7 | 0.00909 |
| Intu      | 3.0 | 0.7 | 1.7 | 0.1 | -1.8 | 0.11408 |
| Impa1     | 3.0 | 0.4 | 2.0 | 0.1 | -1.5 | 0.06199 |
| Pgam1-ps1 | 3.0 | 0.4 | 2.2 | 0.3 | -1.3 | 0.17261 |
| Efnb2     | 3.0 | 0.6 | 1.4 | 0.2 | -2.2 | 0.03828 |
| Ppm1k     | 3.0 | 0.2 | 4.2 | 0.4 | 1.4  | 0.03971 |
| Atp2b1    | 3.0 | 0.3 | 2.2 | 0.1 | -1.4 | 0.02012 |
| Twf1      | 3.0 | 0.3 | 1.6 | 0.1 | -1.9 | 0.00248 |
| Megf9     | 3.0 | 0.6 | 1.4 | 0.2 | -2.1 | 0.05737 |
| Dnajb1    | 3.0 | 0.5 | 1.8 | 0.2 | -1.6 | 0.06877 |
| Setd7     | 3.0 | 0.3 | 1.6 | 0.1 | -1.9 | 0.00852 |
| Zbtb11    | 3.0 | 0.4 | 1.7 | 0.1 | -1.7 | 0.02596 |
| Ano6      | 3.0 | 0.4 | 1.2 | 0.1 | -2.4 | 0.00473 |
| Sik1      | 2.9 | 0.4 | 2.1 | 0.3 | -1.4 | 0.11317 |
| Lats2     | 2.9 | 0.3 | 1.9 | 0.1 | -1.6 | 0.02437 |
| Alkbh5    | 2.9 | 0.3 | 2.0 | 0.1 | -1.5 | 0.02162 |
| Smc1a     | 2.9 | 0.4 | 1.7 | 0.1 | -1.7 | 0.03352 |
| Ecm2      | 2.9 | 0.4 | 1.4 | 0.2 | -2.1 | 0.01530 |
| Gab2      | 2.9 | 0.3 | 1.4 | 0.1 | -2.1 | 0.00526 |
| Sparc1    | 2.9 | 0.5 | 1.1 | 0.1 | -2.8 | 0.01087 |
| Dusp6     | 2.9 | 0.5 | 1.1 | 0.1 | -2.6 | 0.00993 |
| Qrich1    | 2.9 | 0.4 | 1.9 | 0.1 | -1.5 | 0.03498 |
| Uso1      | 2.9 | 0.3 | 1.8 | 0.0 | -1.6 | 0.00753 |
| Hist2h3c1 | 2.9 | 0.4 | 1.1 | 0.1 | -2.6 | 0.00859 |
| Zcchc3    | 2.9 | 0.4 | 2.2 | 0.2 | -1.3 | 0.14936 |
| Hnrnpk    | 2.9 | 0.2 | 2.3 | 0.1 | -1.3 | 0.02326 |
| Tmem64    | 2.9 | 0.3 | 1.8 | 0.1 | -1.6 | 0.00489 |
| Fbxo40    | 2.9 | 0.2 | 1.8 | 0.1 | -1.6 | 0.00446 |
| Fzd4      | 2.9 | 0.2 | 1.8 | 0.1 | -1.6 | 0.00470 |
| Usp13     | 2.9 | 0.2 | 2.3 | 0.1 | -1.3 | 0.02551 |
| Gpr124    | 2.9 | 0.5 | 0.7 | 0.0 | -4.2 | 0.00493 |
| Magi3     | 2.9 | 0.5 | 2.1 | 0.1 | -1.4 | 0.22233 |
| Faf2      | 2.9 | 0.4 | 1.9 | 0.1 | -1.5 | 0.03291 |
| Heatr5a   | 2.9 | 0.4 | 1.4 | 0.1 | -2.1 | 0.00674 |
| Matr3     | 2.9 | 0.2 | 2.3 | 0.1 | -1.3 | 0.05520 |
| Vash1     | 2.9 | 0.5 | 0.4 | 0.0 | -6.8 | 0.00484 |
| Phf3      | 2.9 | 0.2 | 2.2 | 0.1 | -1.3 | 0.01875 |
| Sntb1     | 2.9 | 0.6 | 1.0 | 0.2 | -2.8 | 0.01872 |
| Aftph     | 2.9 | 0.2 | 2.1 | 0.2 | -1.4 | 0.02031 |
| Pcdh12    | 2.9 | 0.5 | 0.9 | 0.1 | -3.1 | 0.01116 |
| Edem3     | 2.9 | 0.3 | 1.8 | 0.1 | -1.6 | 0.00584 |

|           |     |     |     |     |      |         |
|-----------|-----|-----|-----|-----|------|---------|
| Smcr7l    | 2.9 | 0.3 | 2.2 | 0.1 | -1.3 | 0.10437 |
| Tgfb3     | 2.9 | 0.5 | 1.0 | 0.1 | -2.9 | 0.00922 |
| Aebp1     | 2.9 | 0.6 | 0.5 | 0.1 | -5.4 | 0.00937 |
| Zc3h11a   | 2.9 | 0.2 | 1.7 | 0.1 | -1.7 | 0.00149 |
| Dnmt1     | 2.9 | 0.4 | 1.0 | 0.1 | -3.0 | 0.00245 |
| Hspa4l    | 2.9 | 0.2 | 2.0 | 0.1 | -1.4 | 0.00761 |
| Stk10     | 2.9 | 0.5 | 1.0 | 0.1 | -2.9 | 0.01468 |
| Grfl1     | 2.9 | 0.3 | 2.0 | 0.1 | -1.4 | 0.03271 |
| Wac       | 2.9 | 0.3 | 2.2 | 0.1 | -1.3 | 0.06913 |
| Ppfial    | 2.9 | 0.4 | 1.4 | 0.1 | -2.0 | 0.01494 |
| Tdrd3     | 2.9 | 0.3 | 2.0 | 0.1 | -1.4 | 0.03290 |
| Ube2j1    | 2.9 | 0.2 | 2.0 | 0.3 | -1.4 | 0.05358 |
| Heatr5b   | 2.9 | 0.2 | 2.3 | 0.2 | -1.3 | 0.06822 |
| Zhx2      | 2.9 | 0.3 | 1.7 | 0.1 | -1.7 | 0.00675 |
| Rnf4      | 2.9 | 0.3 | 1.3 | 0.1 | -2.2 | 0.00289 |
| Nlk       | 2.9 | 0.3 | 2.0 | 0.1 | -1.4 | 0.02530 |
| Lipa      | 2.9 | 0.2 | 1.6 | 0.1 | -1.7 | 0.00285 |
| Tbc1d15   | 2.9 | 0.3 | 2.2 | 0.2 | -1.3 | 0.10855 |
| Pkn2      | 2.9 | 0.6 | 2.1 | 0.1 | -1.4 | 0.29667 |
| Foxk1     | 2.9 | 0.3 | 1.5 | 0.1 | -1.9 | 0.00736 |
| Coro1c    | 2.9 | 0.3 | 1.1 | 0.1 | -2.6 | 0.00242 |
| Rarb      | 2.9 | 0.4 | 1.8 | 0.3 | -1.6 | 0.07735 |
| Atrn      | 2.9 | 0.3 | 2.0 | 0.1 | -1.4 | 0.03321 |
| Slc25a1   | 2.9 | 0.3 | 1.2 | 0.2 | -2.3 | 0.00066 |
| Cdr2      | 2.9 | 0.6 | 0.8 | 0.1 | -3.6 | 0.01826 |
| Gabarapl1 | 2.9 | 0.2 | 2.1 | 0.2 | -1.4 | 0.03386 |
| Dstyk     | 2.9 | 0.3 | 2.2 | 0.2 | -1.3 | 0.08138 |
| Rbm4b     | 2.8 | 0.5 | 2.2 | 0.2 | -1.3 | 0.23291 |
| Kif5b     | 2.8 | 0.3 | 1.7 | 0.1 | -1.7 | 0.01292 |
| Dync1h1   | 2.8 | 0.3 | 1.6 | 0.1 | -1.8 | 0.00686 |
| Bbc3      | 2.8 | 0.5 | 0.9 | 0.2 | -3.0 | 0.01063 |
| Chd7      | 2.8 | 0.4 | 2.1 | 0.2 | -1.4 | 0.11439 |
| Srcap     | 2.8 | 0.3 | 1.9 | 0.1 | -1.5 | 0.02977 |
| Snx14     | 2.8 | 0.2 | 2.1 | 0.1 | -1.4 | 0.00857 |
| Nav1      | 2.8 | 0.3 | 1.2 | 0.1 | -2.4 | 0.00430 |
| Usp4      | 2.8 | 0.2 | 1.6 | 0.1 | -1.7 | 0.00318 |
| Layn      | 2.8 | 0.4 | 0.9 | 0.2 | -3.3 | 0.00543 |
| Rbm16     | 2.8 | 0.2 | 2.0 | 0.1 | -1.4 | 0.00469 |
| Kpna3     | 2.8 | 0.2 | 1.6 | 0.1 | -1.8 | 0.00014 |
| Rap1b     | 2.8 | 0.6 | 1.2 | 0.1 | -2.3 | 0.04497 |
| St3gal2   | 2.8 | 0.5 | 0.9 | 0.1 | -3.1 | 0.00750 |

|           |     |     |     |     |      |         |
|-----------|-----|-----|-----|-----|------|---------|
| Mcc       | 2.8 | 0.3 | 2.3 | 0.2 | -1.3 | 0.15112 |
| Tmem131   | 2.8 | 0.3 | 2.1 | 0.1 | -1.4 | 0.03068 |
| Fam117b   | 2.8 | 0.4 | 2.3 | 0.4 | -1.3 | 0.33169 |
| Sym       | 2.8 | 0.3 | 1.5 | 0.3 | -1.8 | 0.02093 |
| Casp8     | 2.8 | 0.4 | 1.1 | 0.1 | -2.6 | 0.00565 |
| Pdcl      | 2.8 | 0.2 | 1.9 | 0.2 | -1.5 | 0.00811 |
| Spast     | 2.8 | 0.4 | 1.7 | 0.1 | -1.6 | 0.02876 |
| Thsd1     | 2.8 | 0.4 | 1.3 | 0.1 | -2.2 | 0.00708 |
| Flt1      | 2.8 | 0.3 | 2.1 | 0.2 | -1.4 | 0.06506 |
| Dsc2      | 2.8 | 0.2 | 4.0 | 0.2 | 1.4  | 0.00387 |
| Mtmr12    | 2.8 | 0.4 | 1.0 | 0.0 | -2.7 | 0.00539 |
| Elavl1    | 2.8 | 0.3 | 2.0 | 0.1 | -1.4 | 0.03688 |
| Wdr1      | 2.8 | 0.3 | 1.8 | 0.1 | -1.5 | 0.02363 |
| Epha2     | 2.8 | 0.7 | 1.3 | 0.2 | -2.2 | 0.09549 |
| Ehd2      | 2.8 | 0.3 | 1.0 | 0.1 | -2.8 | 0.00312 |
| Sparc     | 2.8 | 0.4 | 0.5 | 0.1 | -5.3 | 0.00323 |
| Aldh1a1   | 2.8 | 0.3 | 1.0 | 0.1 | -2.9 | 0.00189 |
| Skap2     | 2.8 | 0.4 | 1.1 | 0.2 | -2.6 | 0.00932 |
| Setx      | 2.8 | 0.3 | 2.1 | 0.2 | -1.3 | 0.10489 |
| Crim1     | 2.8 | 0.6 | 1.5 | 0.3 | -1.8 | 0.11178 |
| Rbm15b    | 2.8 | 0.4 | 1.2 | 0.1 | -2.3 | 0.01097 |
| Ddx6      | 2.8 | 0.2 | 2.1 | 0.1 | -1.3 | 0.04168 |
| Myo1e     | 2.8 | 0.4 | 0.9 | 0.1 | -3.2 | 0.00238 |
| Asah1     | 2.8 | 0.4 | 1.2 | 0.2 | -2.3 | 0.00839 |
| Tmed7     | 2.8 | 0.2 | 1.7 | 0.1 | -1.6 | 0.00061 |
| Pcdh1     | 2.8 | 0.3 | 0.9 | 0.1 | -3.0 | 0.00227 |
| Uggt1     | 2.8 | 0.2 | 1.6 | 0.1 | -1.7 | 0.00209 |
| Picalm    | 2.8 | 0.4 | 1.8 | 0.1 | -1.6 | 0.05742 |
| Pgam1-ps2 | 2.8 | 0.4 | 1.9 | 0.2 | -1.4 | 0.09020 |
| Trio      | 2.8 | 0.3 | 1.5 | 0.1 | -1.9 | 0.00605 |
| Vgll4     | 2.8 | 0.3 | 1.3 | 0.1 | -2.1 | 0.00400 |
| Nrp1      | 2.8 | 0.2 | 1.5 | 0.1 | -1.9 | 0.00068 |
| Gfer      | 2.8 | 0.3 | 2.1 | 0.2 | -1.3 | 0.11517 |
| Atp8b2    | 2.8 | 0.4 | 0.6 | 0.1 | -4.7 | 0.00340 |
| Arf3      | 2.8 | 0.3 | 1.2 | 0.1 | -2.3 | 0.00103 |
| Stx12     | 2.8 | 0.4 | 1.5 | 0.1 | -1.8 | 0.02146 |
| Ints7     | 2.8 | 0.4 | 1.4 | 0.0 | -1.9 | 0.01885 |
| Pfn2      | 2.8 | 0.3 | 1.8 | 0.1 | -1.5 | 0.01287 |
| Usp22     | 2.8 | 0.2 | 1.5 | 0.1 | -1.8 | 0.00161 |
| Sec24d    | 2.8 | 0.3 | 1.8 | 0.1 | -1.6 | 0.02726 |
| Clic5     | 2.8 | 0.4 | 1.5 | 0.1 | -1.9 | 0.01340 |



|            |     |     |     |     |      |         |
|------------|-----|-----|-----|-----|------|---------|
| Fbxo42     | 2.7 | 0.4 | 1.6 | 0.1 | -1.7 | 0.04237 |
| Adnp2      | 2.7 | 0.4 | 1.6 | 0.1 | -1.7 | 0.02459 |
| Abcb4      | 2.7 | 0.6 | 1.2 | 0.1 | -2.3 | 0.04929 |
| Kif3b      | 2.7 | 0.3 | 1.3 | 0.1 | -2.2 | 0.00451 |
| Gpr137b-ps | 2.7 | 0.6 | 1.1 | 0.1 | -2.5 | 0.03495 |
| Agap1      | 2.7 | 0.4 | 2.1 | 0.1 | -1.3 | 0.19377 |
| Dchs1      | 2.7 | 0.5 | 0.6 | 0.1 | -4.4 | 0.00645 |
| Fam193a    | 2.7 | 0.3 | 1.8 | 0.2 | -1.5 | 0.02101 |
| Ndst2      | 2.7 | 0.4 | 1.7 | 0.2 | -1.6 | 0.04640 |
| Hmx1       | 2.7 | 0.8 | 0.5 | 0.1 | -6.0 | 0.03813 |
| Ppp2r1b    | 2.7 | 0.2 | 1.6 | 0.1 | -1.7 | 0.00370 |
| Bhlhe40    | 2.7 | 0.3 | 1.1 | 0.1 | -2.4 | 0.00165 |
| Cdh5       | 2.7 | 0.3 | 1.1 | 0.1 | -2.5 | 0.00117 |
| Herc2      | 2.7 | 0.3 | 1.8 | 0.1 | -1.5 | 0.02437 |
| Vezf1      | 2.7 | 0.2 | 2.1 | 0.1 | -1.3 | 0.04879 |
| Nostrin    | 2.7 | 0.4 | 0.7 | 0.1 | -4.0 | 0.00480 |
| Ptprk      | 2.7 | 0.2 | 2.1 | 0.1 | -1.3 | 0.05197 |
| Mlxip      | 2.7 | 0.3 | 2.1 | 0.0 | -1.3 | 0.06202 |
| Irgq       | 2.7 | 0.4 | 1.6 | 0.1 | -1.7 | 0.02720 |
| Ddx21      | 2.7 | 0.2 | 1.5 | 0.1 | -1.9 | 0.00242 |
| Ssr3       | 2.7 | 0.3 | 1.6 | 0.1 | -1.7 | 0.02024 |
| Ap3b1      | 2.7 | 0.3 | 1.4 | 0.1 | -1.9 | 0.00928 |
| Fam18b     | 2.7 | 0.3 | 2.1 | 0.4 | -1.3 | 0.21623 |
| Tmem38b    | 2.7 | 0.4 | 2.0 | 0.2 | -1.4 | 0.11176 |
| Nfatc1     | 2.7 | 0.3 | 1.4 | 0.1 | -2.0 | 0.00899 |
| Wdr6       | 2.7 | 0.3 | 2.0 | 0.3 | -1.4 | 0.11952 |
| Nars2      | 2.7 | 0.4 | 2.1 | 0.4 | -1.3 | 0.35387 |
| Efr3b      | 2.7 | 0.4 | 1.4 | 0.2 | -2.0 | 0.03156 |
| Zfp361l1   | 2.7 | 0.3 | 1.4 | 0.2 | -1.9 | 0.01163 |
| Klf6       | 2.7 | 0.4 | 1.2 | 0.1 | -2.2 | 0.00762 |
| Sash1      | 2.7 | 0.3 | 1.6 | 0.1 | -1.7 | 0.01122 |
| Phactr4    | 2.7 | 0.2 | 1.8 | 0.1 | -1.5 | 0.00290 |
| Gnpda1     | 2.7 | 0.5 | 1.5 | 0.2 | -1.7 | 0.06351 |
| Nln        | 2.7 | 0.3 | 1.4 | 0.1 | -1.8 | 0.01160 |
| Cstf2t     | 2.7 | 0.2 | 1.8 | 0.2 | -1.5 | 0.00592 |
| Armcx3     | 2.7 | 0.4 | 1.4 | 0.2 | -1.8 | 0.03608 |
| Tmem30a    | 2.7 | 0.3 | 1.4 | 0.1 | -1.9 | 0.00321 |
| Atxn7      | 2.7 | 0.2 | 1.6 | 0.1 | -1.6 | 0.00685 |
| Dync1li2   | 2.7 | 0.3 | 1.5 | 0.1 | -1.8 | 0.00532 |
| Socs7      | 2.7 | 0.5 | 1.7 | 0.2 | -1.6 | 0.10252 |
| Fbxl17     | 2.6 | 0.2 | 1.9 | 0.2 | -1.4 | 0.03280 |

|          |     |     |     |     |      |         |
|----------|-----|-----|-----|-----|------|---------|
| Usp42    | 2.6 | 0.2 | 1.8 | 0.1 | -1.5 | 0.01298 |
| Ece1     | 2.6 | 0.7 | 1.3 | 0.1 | -2.0 | 0.14233 |
| Inpp1    | 2.6 | 0.4 | 1.4 | 0.1 | -2.0 | 0.03138 |
| Yipf5    | 2.6 | 0.3 | 1.5 | 0.2 | -1.8 | 0.01934 |
| Sh3bp4   | 2.6 | 0.3 | 0.8 | 0.1 | -3.4 | 0.00103 |
| Acvr1b   | 2.6 | 0.3 | 1.9 | 0.2 | -1.4 | 0.10741 |
| Ppm1l    | 2.6 | 0.3 | 3.8 | 0.3 | 1.4  | 0.02517 |
| Prrx1    | 2.6 | 0.3 | 1.3 | 0.1 | -2.1 | 0.00472 |
| Fam3c    | 2.6 | 0.4 | 1.2 | 0.1 | -2.3 | 0.00785 |
| Cdk13    | 2.6 | 0.2 | 1.5 | 0.1 | -1.7 | 0.00052 |
| Zfand5   | 2.6 | 0.4 | 1.9 | 0.3 | -1.4 | 0.13899 |
| Golt1b   | 2.6 | 0.3 | 1.6 | 0.2 | -1.7 | 0.01975 |
| Ldlrap1  | 2.6 | 0.4 | 1.2 | 0.1 | -2.1 | 0.01243 |
| Aldh18a1 | 2.6 | 0.6 | 0.7 | 0.1 | -3.7 | 0.02352 |
| Ylpm1    | 2.6 | 0.2 | 1.9 | 0.1 | -1.4 | 0.01699 |
| Tnfrsf21 | 2.6 | 0.3 | 1.2 | 0.1 | -2.3 | 0.00323 |
| Mybpc2   | 2.6 | 0.4 | 0.4 | 0.0 | -6.3 | 0.00209 |
| Sec14l1  | 2.6 | 0.3 | 1.1 | 0.1 | -2.5 | 0.00587 |
| Exoc2    | 2.6 | 0.2 | 2.0 | 0.2 | -1.3 | 0.03595 |
| Nvl      | 2.6 | 0.2 | 2.1 | 0.2 | -1.3 | 0.09792 |
| Rarg     | 2.6 | 0.6 | 3.3 | 1.6 | 1.3  | 0.71821 |
| Klhl2    | 2.6 | 0.3 | 1.9 | 0.1 | -1.4 | 0.07349 |
| Sgpp1    | 2.6 | 0.2 | 2.1 | 0.1 | -1.3 | 0.07700 |
| Smek1    | 2.6 | 0.3 | 1.7 | 0.2 | -1.6 | 0.02839 |
| Limal    | 2.6 | 0.3 | 1.0 | 0.1 | -2.6 | 0.00459 |
| Csf1     | 2.6 | 0.4 | 1.0 | 0.1 | -2.5 | 0.00741 |
| Pdxk     | 2.6 | 0.4 | 1.4 | 0.1 | -1.9 | 0.01860 |
| Gsr      | 2.6 | 0.4 | 1.7 | 0.1 | -1.6 | 0.06911 |
| Ei24     | 2.6 | 0.2 | 2.0 | 0.2 | -1.3 | 0.04603 |
| Mut      | 2.6 | 0.2 | 3.5 | 0.3 | 1.4  | 0.04094 |
| Ankrd13c | 2.6 | 0.2 | 1.7 | 0.1 | -1.5 | 0.00992 |
| Wwc2     | 2.6 | 0.3 | 1.6 | 0.1 | -1.7 | 0.00945 |
| Syt11    | 2.6 | 0.3 | 1.6 | 0.1 | -1.6 | 0.01103 |
| Cpsf2    | 2.6 | 0.2 | 1.9 | 0.2 | -1.3 | 0.01848 |
| Pef11    | 2.6 | 0.3 | 1.9 | 0.1 | -1.4 | 0.05575 |
| Adra1a   | 2.6 | 0.2 | 4.4 | 0.9 | 1.7  | 0.11255 |
| P4hal    | 2.6 | 0.4 | 1.0 | 0.1 | -2.6 | 0.01104 |
| Copb1    | 2.6 | 0.3 | 1.5 | 0.1 | -1.7 | 0.01079 |
| Spon1    | 2.6 | 0.4 | 1.3 | 0.1 | -2.0 | 0.01291 |
| Chordc1  | 2.6 | 0.2 | 1.8 | 0.1 | -1.4 | 0.01513 |
| Bclaf1   | 2.6 | 0.2 | 1.9 | 0.2 | -1.4 | 0.02968 |

|         |     |     |     |     |      |         |
|---------|-----|-----|-----|-----|------|---------|
| Tubb5   | 2.6 | 0.3 | 0.9 | 0.1 | -3.0 | 0.00117 |
| Nova2   | 2.6 | 0.3 | 0.8 | 0.1 | -3.3 | 0.00208 |
| Senp2   | 2.6 | 0.3 | 1.7 | 0.2 | -1.5 | 0.05791 |
| Ppp4r2  | 2.6 | 0.3 | 2.0 | 0.1 | -1.3 | 0.09842 |
| Slc35f5 | 2.6 | 0.2 | 1.7 | 0.0 | -1.5 | 0.00593 |
| Man2b1  | 2.6 | 0.4 | 0.9 | 0.1 | -2.9 | 0.00543 |
| Atp6ap2 | 2.6 | 0.5 | 1.6 | 0.2 | -1.6 | 0.10621 |
| C1qtnf6 | 2.6 | 0.4 | 0.5 | 0.1 | -4.7 | 0.00537 |
| Angptl2 | 2.6 | 0.6 | 0.8 | 0.1 | -3.1 | 0.02792 |
| C80913  | 2.6 | 0.3 | 1.3 | 0.1 | -2.0 | 0.00543 |
| Myadm   | 2.6 | 0.2 | 1.3 | 0.1 | -1.9 | 0.00354 |
| Clip4   | 2.6 | 0.2 | 1.6 | 0.1 | -1.6 | 0.00829 |
| Glg1    | 2.6 | 0.3 | 1.6 | 0.1 | -1.6 | 0.01161 |
| Ddx19b  | 2.6 | 0.4 | 1.6 | 0.1 | -1.6 | 0.05021 |
| Cyb5b   | 2.6 | 0.3 | 1.9 | 0.1 | -1.3 | 0.09854 |
| Pofut1  | 2.6 | 0.3 | 1.4 | 0.1 | -1.8 | 0.00512 |
| Rasgrp3 | 2.6 | 0.3 | 1.0 | 0.1 | -2.4 | 0.00201 |
| Rcc2    | 2.5 | 0.3 | 1.0 | 0.1 | -2.7 | 0.00104 |
| Fam59a  | 2.5 | 0.3 | 1.8 | 0.1 | -1.4 | 0.05039 |
| Timp2   | 2.5 | 0.3 | 1.2 | 0.1 | -2.1 | 0.01131 |
| Pcnx    | 2.5 | 0.3 | 1.7 | 0.1 | -1.5 | 0.02340 |
| Ttyh3   | 2.5 | 0.4 | 0.6 | 0.1 | -4.1 | 0.00482 |
| Cyth3   | 2.5 | 0.4 | 1.1 | 0.1 | -2.3 | 0.01248 |
| Ubqln1  | 2.5 | 0.3 | 1.9 | 0.1 | -1.4 | 0.05534 |
| Cdk7    | 2.5 | 0.2 | 1.9 | 0.1 | -1.4 | 0.02666 |
| Cdca4   | 2.5 | 0.4 | 0.9 | 0.1 | -2.8 | 0.00764 |
| Gpkow   | 2.5 | 0.4 | 1.8 | 0.1 | -1.4 | 0.08818 |
| Ankrd52 | 2.5 | 0.4 | 1.9 | 0.1 | -1.4 | 0.12432 |
| Blzf1   | 2.5 | 0.2 | 1.9 | 0.1 | -1.3 | 0.01641 |
| Clec14a | 2.5 | 0.4 | 0.7 | 0.1 | -3.6 | 0.00650 |
| Yy1     | 2.5 | 0.2 | 1.6 | 0.1 | -1.5 | 0.00183 |
| Mrc2    | 2.5 | 0.4 | 0.5 | 0.1 | -5.3 | 0.00274 |
| Usp28   | 2.5 | 0.2 | 1.7 | 0.1 | -1.5 | 0.01029 |
| Dhx9    | 2.5 | 0.2 | 1.5 | 0.1 | -1.7 | 0.00376 |
| Nes     | 2.5 | 0.4 | 0.5 | 0.0 | -4.8 | 0.00336 |
| Ets2    | 2.5 | 0.3 | 1.2 | 0.1 | -2.1 | 0.00509 |
| Cnot4   | 2.5 | 0.2 | 2.0 | 0.1 | -1.3 | 0.07714 |
| Pdha2   | 2.5 | 0.3 | 2.0 | 0.2 | -1.3 | 0.17081 |
| Gjc1    | 2.5 | 0.3 | 0.9 | 0.1 | -3.0 | 0.00332 |
| Col4a1  | 2.5 | 0.3 | 0.8 | 0.1 | -3.3 | 0.00229 |
| Irf2bp2 | 2.5 | 0.3 | 1.8 | 0.2 | -1.4 | 0.07911 |

|           |     |     |     |     |      |         |
|-----------|-----|-----|-----|-----|------|---------|
| Coq10b    | 2.5 | 0.5 | 1.4 | 0.1 | -1.8 | 0.05541 |
| Actb      | 2.5 | 0.3 | 1.0 | 0.1 | -2.6 | 0.00357 |
| Siah2     | 2.5 | 0.6 | 1.8 | 0.2 | -1.4 | 0.33835 |
| Wipi1     | 2.5 | 0.3 | 1.4 | 0.1 | -1.8 | 0.00566 |
| Mtf1      | 2.5 | 0.2 | 1.6 | 0.1 | -1.6 | 0.00499 |
| Ywhag     | 2.5 | 0.2 | 1.7 | 0.1 | -1.5 | 0.01518 |
| Dnajc10   | 2.5 | 0.4 | 1.3 | 0.1 | -2.0 | 0.02397 |
| Kidins220 | 2.5 | 0.2 | 1.6 | 0.1 | -1.5 | 0.01481 |
| Fbln5     | 2.5 | 0.3 | 0.9 | 0.1 | -2.7 | 0.00264 |
| Smtnl2    | 2.5 | 0.7 | 1.4 | 0.2 | -1.8 | 0.19138 |
| Pols      | 2.5 | 0.2 | 1.0 | 0.1 | -2.4 | 0.00122 |
| Brwd2     | 2.5 | 0.3 | 1.5 | 0.1 | -1.6 | 0.01278 |
| Cdc42se2  | 2.5 | 0.2 | 1.4 | 0.1 | -1.8 | 0.00448 |
| Eif4ebp2  | 2.5 | 0.3 | 1.9 | 0.1 | -1.3 | 0.10590 |
| Hist1h4i  | 2.5 | 0.4 | 1.4 | 0.2 | -1.8 | 0.04079 |
| H3f3b     | 2.5 | 0.2 | 1.4 | 0.1 | -1.8 | 0.00083 |
| Sik2      | 2.5 | 0.3 | 1.9 | 0.1 | -1.3 | 0.12053 |
| Cdc42     | 2.5 | 0.3 | 1.3 | 0.1 | -1.9 | 0.00769 |
| Mbtps1    | 2.5 | 0.3 | 1.4 | 0.1 | -1.8 | 0.02251 |
| Rcan1     | 2.5 | 0.6 | 0.6 | 0.1 | -4.3 | 0.02459 |
| Lbr       | 2.5 | 0.2 | 1.6 | 0.1 | -1.5 | 0.00916 |
| Gpr116    | 2.5 | 0.4 | 1.9 | 0.1 | -1.3 | 0.19264 |
| Nrarp     | 2.5 | 0.3 | 0.8 | 0.1 | -3.2 | 0.00261 |
| Steap4    | 2.5 | 0.3 | 1.3 | 0.1 | -1.9 | 0.01548 |
| Xirp1     | 2.5 | 0.4 | 1.1 | 0.1 | -2.2 | 0.01206 |
| Casp7     | 2.5 | 0.3 | 1.3 | 0.1 | -1.9 | 0.00478 |
| Bcl6b     | 2.5 | 0.3 | 0.5 | 0.0 | -5.3 | 0.00076 |
| Rhoq      | 2.5 | 0.2 | 1.5 | 0.1 | -1.7 | 0.00162 |
| Rad21     | 2.5 | 0.2 | 1.7 | 0.1 | -1.5 | 0.01420 |
| Zfp68     | 2.5 | 0.5 | 2.0 | 0.4 | -1.3 | 0.44584 |
| Rrp12     | 2.5 | 0.4 | 0.7 | 0.1 | -3.7 | 0.00506 |
| Poldip3   | 2.5 | 0.3 | 1.3 | 0.1 | -1.9 | 0.00714 |
| Rab3gap2  | 2.5 | 0.2 | 1.3 | 0.1 | -1.9 | 0.00309 |
| Pat1      | 2.5 | 0.3 | 1.8 | 0.1 | -1.4 | 0.07103 |
| Serpine2  | 2.5 | 0.8 | 0.5 | 0.1 | -5.1 | 0.05150 |
| Rasl11b   | 2.5 | 0.6 | 1.1 | 0.3 | -2.3 | 0.06176 |
| Rbm7      | 2.5 | 0.3 | 1.4 | 0.1 | -1.8 | 0.01221 |
| Scyl2     | 2.5 | 0.2 | 1.6 | 0.1 | -1.5 | 0.00998 |
| Peg3      | 2.5 | 0.2 | 1.9 | 0.2 | -1.3 | 0.09043 |
| Smad2     | 2.5 | 0.4 | 1.7 | 0.4 | -1.5 | 0.20123 |
| Ythdf2    | 2.5 | 0.2 | 1.2 | 0.1 | -2.0 | 0.00026 |

|         |     |     |     |     |      |         |
|---------|-----|-----|-----|-----|------|---------|
| Ubr5    | 2.5 | 0.3 | 1.7 | 0.1 | -1.5 | 0.03282 |
| Erlin2  | 2.5 | 0.2 | 1.4 | 0.1 | -1.8 | 0.00176 |
| Gpre5b  | 2.5 | 0.5 | 0.8 | 0.1 | -3.3 | 0.01274 |
| Gpr125  | 2.5 | 0.3 | 1.5 | 0.1 | -1.6 | 0.01886 |
| Pik3c2b | 2.5 | 0.3 | 1.5 | 0.2 | -1.6 | 0.03297 |
| Tle4    | 2.5 | 0.2 | 1.9 | 0.1 | -1.3 | 0.02149 |
| Kat2b   | 2.5 | 0.2 | 1.9 | 0.1 | -1.3 | 0.05951 |
| Tln2    | 2.5 | 0.4 | 1.9 | 0.1 | -1.3 | 0.20210 |
| Csf1r   | 2.4 | 0.3 | 0.6 | 0.1 | -4.0 | 0.00209 |
| Mdc1    | 2.4 | 0.2 | 1.4 | 0.1 | -1.7 | 0.00583 |
| X99384  | 2.4 | 0.4 | 0.6 | 0.1 | -4.1 | 0.00406 |
| Oxsr1   | 2.4 | 0.3 | 1.8 | 0.1 | -1.4 | 0.10457 |
| Mcl1    | 2.4 | 0.2 | 1.7 | 0.1 | -1.4 | 0.02004 |
| Kdelr3  | 2.4 | 0.4 | 0.7 | 0.1 | -3.7 | 0.00738 |
| Zbtb16  | 2.4 | 0.3 | 4.8 | 0.8 | 2.0  | 0.03510 |
| Josd1   | 2.4 | 0.3 | 1.8 | 0.1 | -1.4 | 0.10625 |
| Gclc    | 2.4 | 0.3 | 1.5 | 0.2 | -1.6 | 0.05119 |
| Srbd1   | 2.4 | 0.4 | 1.3 | 0.3 | -1.8 | 0.04340 |
| Smad4   | 2.4 | 0.3 | 1.7 | 0.1 | -1.5 | 0.02718 |
| Ulk2    | 2.4 | 0.2 | 1.7 | 0.1 | -1.4 | 0.02665 |
| Naa40   | 2.4 | 0.3 | 1.9 | 0.2 | -1.3 | 0.14993 |
| Rqcd1   | 2.4 | 0.3 | 1.7 | 0.2 | -1.5 | 0.07512 |
| Btg1    | 2.4 | 0.5 | 1.2 | 0.1 | -2.1 | 0.04641 |
| Mnt     | 2.4 | 0.3 | 1.4 | 0.1 | -1.7 | 0.00793 |
| Clic4   | 2.4 | 0.3 | 1.5 | 0.1 | -1.6 | 0.02191 |
| St5     | 2.4 | 0.3 | 1.6 | 0.1 | -1.5 | 0.01802 |
| Tspan12 | 2.4 | 0.2 | 1.6 | 0.1 | -1.5 | 0.02363 |
| Fam98b  | 2.4 | 0.3 | 1.7 | 0.1 | -1.4 | 0.04013 |
| Nr4a3   | 2.4 | 0.5 | 0.9 | 0.2 | -2.6 | 0.04108 |
| Rras2   | 2.4 | 0.3 | 1.0 | 0.1 | -2.4 | 0.00789 |
| Itpkb   | 2.4 | 0.3 | 1.1 | 0.1 | -2.1 | 0.00297 |
| Kpnb1   | 2.4 | 0.3 | 1.3 | 0.1 | -1.9 | 0.01653 |
| Kdr     | 2.4 | 0.2 | 1.8 | 0.2 | -1.3 | 0.07271 |
| Ppp2r5c | 2.4 | 0.3 | 1.8 | 0.1 | -1.4 | 0.06148 |
| Polr1b  | 2.4 | 0.2 | 1.6 | 0.3 | -1.5 | 0.04147 |
| Itga5   | 2.4 | 0.4 | 0.9 | 0.1 | -2.8 | 0.00716 |
| Ext1    | 2.4 | 0.4 | 1.3 | 0.1 | -1.8 | 0.02651 |
| Ccdc8   | 2.4 | 0.6 | 0.7 | 0.1 | -3.5 | 0.02967 |
| Cnot2   | 2.4 | 0.2 | 1.9 | 0.1 | -1.3 | 0.05564 |
| Slc16a1 | 2.4 | 0.2 | 1.9 | 0.1 | -1.3 | 0.05973 |
| Bcl6    | 2.4 | 0.2 | 1.5 | 0.1 | -1.6 | 0.00919 |

|           |     |     |     |     |      |         |
|-----------|-----|-----|-----|-----|------|---------|
| Srfbp1    | 2.4 | 0.1 | 1.5 | 0.1 | -1.6 | 0.00045 |
| Galnt1    | 2.4 | 0.3 | 1.6 | 0.1 | -1.5 | 0.02533 |
| Surf6     | 2.4 | 0.2 | 1.3 | 0.1 | -1.9 | 0.00090 |
| Prr8      | 2.4 | 0.2 | 1.8 | 0.1 | -1.3 | 0.03475 |
| Srpk1     | 2.4 | 0.3 | 1.8 | 0.1 | -1.4 | 0.08928 |
| Podxl     | 2.4 | 0.3 | 1.2 | 0.1 | -1.9 | 0.01062 |
| Kdm6b     | 2.4 | 0.3 | 1.5 | 0.1 | -1.6 | 0.02252 |
| Rhobtb1   | 2.4 | 0.2 | 1.7 | 0.2 | -1.4 | 0.02808 |
| Tcea1-ps1 | 2.4 | 0.3 | 0.9 | 0.1 | -2.5 | 0.00714 |
| Hsp90aa1  | 2.4 | 0.1 | 1.3 | 0.1 | -1.9 | 0.00012 |
| Ptdss1    | 2.4 | 0.4 | 1.3 | 0.1 | -1.8 | 0.03159 |
| Acbd3     | 2.4 | 0.3 | 1.4 | 0.1 | -1.7 | 0.01667 |
| Tnfaip1   | 2.4 | 0.3 | 1.2 | 0.1 | -2.0 | 0.00453 |
| Uhrf1bp1l | 2.4 | 0.3 | 1.7 | 0.1 | -1.4 | 0.06070 |
| Gbp2      | 2.4 | 0.5 | 0.8 | 0.2 | -2.9 | 0.02344 |
| Csnk1a1   | 2.4 | 0.2 | 1.6 | 0.1 | -1.5 | 0.00815 |
| Parp12    | 2.4 | 0.3 | 1.1 | 0.1 | -2.2 | 0.00571 |
| Zfp526    | 2.4 | 0.3 | 1.7 | 0.2 | -1.4 | 0.12526 |
| Alkbh4    | 2.4 | 0.5 | 1.6 | 0.2 | -1.5 | 0.17890 |
| Cd34      | 2.4 | 0.3 | 0.7 | 0.1 | -3.2 | 0.00179 |
| Lmbr1l    | 2.4 | 0.1 | 1.6 | 0.2 | -1.4 | 0.00594 |
| C2cd2     | 2.4 | 0.3 | 1.2 | 0.1 | -1.9 | 0.00758 |
| Prkar2a   | 2.4 | 0.2 | 1.7 | 0.1 | -1.4 | 0.02644 |
| Ptptra    | 2.4 | 0.2 | 1.3 | 0.1 | -1.8 | 0.00291 |
| Smc3      | 2.4 | 0.3 | 1.7 | 0.2 | -1.4 | 0.10686 |
| Vps35     | 2.4 | 0.2 | 1.5 | 0.2 | -1.6 | 0.00808 |
| Gnb1      | 2.4 | 0.2 | 1.3 | 0.1 | -1.9 | 0.00432 |
| Atp6v1b2  | 2.4 | 0.2 | 1.8 | 0.2 | -1.3 | 0.04775 |
| Fubp1     | 2.4 | 0.2 | 1.4 | 0.2 | -1.7 | 0.00336 |
| Vamp3     | 2.4 | 0.2 | 1.3 | 0.1 | -1.8 | 0.00105 |
| Plxna1    | 2.4 | 0.3 | 1.1 | 0.1 | -2.1 | 0.01212 |
| Acta1     | 2.4 | 0.4 | 0.3 | 0.0 | -8.6 | 0.00409 |
| Golga3    | 2.4 | 0.2 | 1.7 | 0.1 | -1.4 | 0.03263 |
| Senp6     | 2.4 | 0.2 | 1.8 | 0.1 | -1.3 | 0.04738 |
| Stat1     | 2.4 | 0.3 | 1.2 | 0.1 | -2.0 | 0.00723 |
| Ctdsp2    | 2.4 | 0.2 | 1.4 | 0.1 | -1.7 | 0.00995 |
| Smg1      | 2.3 | 0.1 | 1.8 | 0.1 | -1.3 | 0.01650 |
| Akna      | 2.3 | 0.3 | 1.1 | 0.1 | -2.2 | 0.00769 |
| Arl10     | 2.3 | 0.4 | 1.1 | 0.1 | -2.1 | 0.03615 |
| Ppara     | 2.3 | 0.3 | 3.9 | 0.4 | 1.7  | 0.01740 |
| Abra      | 2.3 | 0.4 | 0.9 | 0.1 | -2.6 | 0.00859 |

|         |     |     |     |     |      |         |
|---------|-----|-----|-----|-----|------|---------|
| Stt3b   | 2.3 | 0.3 | 1.5 | 0.0 | -1.6 | 0.02106 |
| Ywhab   | 2.3 | 0.2 | 1.2 | 0.1 | -2.0 | 0.00285 |
| Iws1    | 2.3 | 0.2 | 1.5 | 0.1 | -1.6 | 0.00153 |
| Kdm2a   | 2.3 | 0.3 | 1.4 | 0.1 | -1.6 | 0.02227 |
| Klraql  | 2.3 | 0.4 | 1.0 | 0.1 | -2.3 | 0.02044 |
| Sox4    | 2.3 | 0.6 | 1.0 | 0.1 | -2.3 | 0.07836 |
| Bcr     | 2.3 | 0.3 | 1.1 | 0.1 | -2.2 | 0.01238 |
| Tgfbi   | 2.3 | 0.3 | 0.8 | 0.1 | -2.9 | 0.00297 |
| Zzef1   | 2.3 | 0.3 | 1.4 | 0.1 | -1.6 | 0.01469 |
| Irf8    | 2.3 | 0.5 | 0.7 | 0.1 | -3.2 | 0.01629 |
| Pde8a   | 2.3 | 0.2 | 1.0 | 0.1 | -2.3 | 0.00022 |
| Srgap2  | 2.3 | 0.2 | 1.0 | 0.1 | -2.2 | 0.00221 |
| Ptpn21  | 2.3 | 0.2 | 1.4 | 0.1 | -1.7 | 0.01102 |
| Naa15   | 2.3 | 0.2 | 1.6 | 0.2 | -1.5 | 0.01454 |
| Ppp2cb  | 2.3 | 0.3 | 1.4 | 0.0 | -1.7 | 0.03257 |
| Rgs4    | 2.3 | 0.4 | 1.5 | 0.2 | -1.5 | 0.10050 |
| Sox7    | 2.3 | 0.5 | 0.7 | 0.1 | -3.2 | 0.03056 |
| Prep    | 2.3 | 0.2 | 1.5 | 0.1 | -1.5 | 0.01580 |
| Pskh1   | 2.3 | 0.2 | 1.5 | 0.1 | -1.5 | 0.01727 |
| Ugdh    | 2.3 | 0.4 | 1.3 | 0.1 | -1.7 | 0.06048 |
| Nppa    | 2.3 | 0.5 | 0.3 | 0.1 | -8.2 | 0.00979 |
| Stx17   | 2.3 | 0.3 | 1.8 | 0.2 | -1.3 | 0.22727 |
| Sppl3   | 2.3 | 0.3 | 1.5 | 0.1 | -1.6 | 0.04165 |
| Mfhas1  | 2.3 | 0.2 | 1.4 | 0.1 | -1.6 | 0.01262 |
| Pknx1   | 2.3 | 0.2 | 1.5 | 0.2 | -1.5 | 0.01848 |
| Kbtbd10 | 2.3 | 0.3 | 1.7 | 0.1 | -1.4 | 0.08547 |
| Ubap2l  | 2.3 | 0.2 | 1.6 | 0.3 | -1.5 | 0.08026 |
| Ppil4   | 2.3 | 0.3 | 1.6 | 0.1 | -1.4 | 0.04547 |
| Eif3j   | 2.3 | 0.3 | 1.8 | 0.1 | -1.3 | 0.15665 |
| Yap1    | 2.3 | 0.2 | 1.7 | 0.1 | -1.4 | 0.06406 |
| Prkab2  | 2.3 | 0.4 | 1.2 | 0.2 | -1.9 | 0.02828 |
| B4galt6 | 2.3 | 0.1 | 1.8 | 0.1 | -1.3 | 0.01392 |
| Zfp592  | 2.3 | 0.2 | 1.6 | 0.1 | -1.4 | 0.00777 |
| Car3    | 2.3 | 0.7 | 3.7 | 2.1 | 1.6  | 0.54033 |
| Runde2a | 2.3 | 0.5 | 1.7 | 0.4 | -1.4 | 0.38730 |
| Lman1   | 2.3 | 0.3 | 1.6 | 0.1 | -1.4 | 0.04695 |
| Pgm5    | 2.3 | 0.3 | 1.6 | 0.1 | -1.5 | 0.03534 |
| Eprs    | 2.3 | 0.2 | 1.7 | 0.1 | -1.3 | 0.06641 |
| Cnn3    | 2.3 | 0.2 | 0.6 | 0.0 | -3.6 | 0.00098 |
| Hira    | 2.3 | 0.4 | 1.5 | 0.1 | -1.5 | 0.07627 |
| Cux1    | 2.3 | 0.2 | 1.7 | 0.1 | -1.3 | 0.01671 |

|          |     |     |     |     |      |         |
|----------|-----|-----|-----|-----|------|---------|
| Elk3     | 2.3 | 0.2 | 1.1 | 0.1 | -2.0 | 0.00121 |
| Scamp5   | 2.3 | 0.4 | 1.0 | 0.1 | -2.3 | 0.01457 |
| Kctd5    | 2.3 | 0.4 | 1.3 | 0.1 | -1.7 | 0.04632 |
| Chmp4c   | 2.3 | 0.3 | 1.8 | 0.1 | -1.3 | 0.14702 |
| Tcerg1   | 2.3 | 0.2 | 1.6 | 0.1 | -1.5 | 0.03321 |
| Tex2     | 2.3 | 0.3 | 1.7 | 0.1 | -1.3 | 0.18450 |
| Carhsp1  | 2.3 | 0.4 | 0.6 | 0.1 | -3.6 | 0.00832 |
| Baz2a    | 2.3 | 0.2 | 1.5 | 0.1 | -1.6 | 0.00867 |
| Khynyn   | 2.3 | 0.2 | 1.3 | 0.1 | -1.7 | 0.01155 |
| N4bp1    | 2.3 | 0.3 | 1.6 | 0.1 | -1.4 | 0.08872 |
| Stx7     | 2.3 | 0.3 | 1.5 | 0.1 | -1.5 | 0.05173 |
| Aco1     | 2.3 | 0.4 | 1.4 | 0.3 | -1.6 | 0.10015 |
| Slc35c1  | 2.3 | 0.2 | 1.1 | 0.1 | -2.1 | 0.00432 |
| Mll2     | 2.3 | 0.3 | 1.7 | 0.2 | -1.3 | 0.10082 |
| Syk      | 2.3 | 0.4 | 1.2 | 0.1 | -1.9 | 0.04598 |
| Ednrb    | 2.3 | 0.3 | 1.3 | 0.1 | -1.7 | 0.03293 |
| Gatad2a  | 2.3 | 0.3 | 1.1 | 0.1 | -2.1 | 0.00663 |
| Crtc1    | 2.3 | 0.4 | 1.2 | 0.1 | -1.8 | 0.04838 |
| Papss1   | 2.3 | 0.4 | 1.0 | 0.1 | -2.3 | 0.01389 |
| Plxdc1   | 2.3 | 0.3 | 1.0 | 0.1 | -2.2 | 0.00634 |
| Arrdc4   | 2.2 | 0.2 | 1.3 | 0.1 | -1.7 | 0.00652 |
| Psmc6    | 2.2 | 0.3 | 1.7 | 0.2 | -1.3 | 0.13363 |
| Spred2   | 2.2 | 0.2 | 1.4 | 0.1 | -1.6 | 0.01220 |
| Crispld2 | 2.2 | 0.3 | 0.7 | 0.1 | -3.1 | 0.00645 |
| Asb12    | 2.2 | 0.3 | 1.8 | 0.1 | -1.3 | 0.16912 |
| Eif4b    | 2.2 | 0.3 | 1.3 | 0.1 | -1.7 | 0.01329 |
| Gbp9     | 2.2 | 0.5 | 0.6 | 0.1 | -3.7 | 0.02002 |
| Vat1     | 2.2 | 0.4 | 0.5 | 0.2 | -4.9 | 0.00643 |
| Sec23ip  | 2.2 | 0.1 | 1.6 | 0.1 | -1.4 | 0.00110 |
| Rab21    | 2.2 | 0.2 | 1.7 | 0.1 | -1.3 | 0.02860 |
| Hmg20a   | 2.2 | 0.3 | 1.7 | 0.1 | -1.3 | 0.13592 |
| Sfrs1    | 2.2 | 0.2 | 1.5 | 0.1 | -1.5 | 0.01963 |
| Mmp2     | 2.2 | 0.3 | 0.9 | 0.1 | -2.5 | 0.00453 |
| Phf20l1  | 2.2 | 0.2 | 0.9 | 0.3 | -2.4 | 0.00680 |
| Bpnt1    | 2.2 | 0.3 | 1.5 | 0.1 | -1.5 | 0.07391 |
| Il4ra    | 2.2 | 0.5 | 0.5 | 0.1 | -4.2 | 0.02727 |
| Dhx15    | 2.2 | 0.1 | 1.4 | 0.1 | -1.5 | 0.00002 |
| Pygl     | 2.2 | 0.4 | 1.5 | 0.1 | -1.5 | 0.12816 |
| App      | 2.2 | 0.3 | 1.0 | 0.1 | -2.2 | 0.00463 |
| Tmem173  | 2.2 | 0.7 | 0.8 | 0.1 | -2.9 | 0.10377 |
| Hspa4    | 2.2 | 0.2 | 1.5 | 0.1 | -1.5 | 0.01331 |



|         |     |     |     |     |      |         |
|---------|-----|-----|-----|-----|------|---------|
| Nup93   | 2.2 | 0.3 | 1.3 | 0.1 | -1.8 | 0.01905 |
| Crk     | 2.2 | 0.2 | 1.0 | 0.0 | -2.3 | 0.00341 |
| Pon2    | 2.2 | 0.5 | 1.2 | 0.1 | -1.9 | 0.10014 |
| Myom1   | 2.2 | 0.2 | 1.8 | 0.1 | -1.3 | 0.05475 |
| Myot    | 2.2 | 0.6 | 1.3 | 0.1 | -1.7 | 0.17929 |
| Pdcd6ip | 2.2 | 0.2 | 1.2 | 0.1 | -1.8 | 0.00318 |
| Sec62   | 2.2 | 0.2 | 1.5 | 0.1 | -1.5 | 0.00766 |
| Arhgef3 | 2.2 | 0.2 | 1.3 | 0.0 | -1.7 | 0.01296 |
| Phlpp1  | 2.2 | 0.3 | 1.6 | 0.1 | -1.4 | 0.08525 |
| H2-T24  | 2.2 | 0.4 | 1.3 | 0.2 | -1.7 | 0.07470 |
| Krt222  | 2.2 | 0.4 | 1.7 | 0.2 | -1.3 | 0.32175 |
| Aplp2   | 2.2 | 0.2 | 1.5 | 0.1 | -1.4 | 0.02653 |
| C1qtnf1 | 2.2 | 0.5 | 1.1 | 0.1 | -2.1 | 0.06087 |
| Cerk    | 2.2 | 0.2 | 1.6 | 0.1 | -1.3 | 0.02851 |
| Ep300   | 2.2 | 0.3 | 1.4 | 0.1 | -1.5 | 0.03413 |
| Litaf   | 2.2 | 0.5 | 0.7 | 0.1 | -3.3 | 0.03477 |
| Ipo7    | 2.2 | 0.2 | 1.3 | 0.1 | -1.7 | 0.00943 |
| Ranbp9  | 2.2 | 0.2 | 1.7 | 0.2 | -1.3 | 0.12084 |
| Tbl2    | 2.2 | 0.2 | 1.2 | 0.1 | -1.8 | 0.00638 |
| Zcchc14 | 2.2 | 0.3 | 1.3 | 0.1 | -1.7 | 0.01527 |
| Mcart1  | 2.2 | 0.2 | 1.7 | 0.1 | -1.3 | 0.05599 |
| Siah1a  | 2.2 | 0.2 | 1.6 | 0.1 | -1.3 | 0.02405 |
| Prpf18  | 2.2 | 0.1 | 1.7 | 0.2 | -1.3 | 0.02204 |
| Tspan14 | 2.2 | 0.2 | 0.9 | 0.1 | -2.4 | 0.00127 |
| Polr2a  | 2.2 | 0.2 | 1.4 | 0.1 | -1.6 | 0.01254 |
| Ppp1r3c | 2.2 | 0.4 | 1.7 | 0.1 | -1.3 | 0.22253 |
| Ipo5    | 2.2 | 0.2 | 1.4 | 0.1 | -1.6 | 0.00764 |
| Xpot    | 2.2 | 0.2 | 1.6 | 0.1 | -1.4 | 0.01512 |
| Etf1    | 2.2 | 0.3 | 1.6 | 0.1 | -1.3 | 0.10264 |
| Sbf2    | 2.2 | 0.3 | 1.4 | 0.1 | -1.5 | 0.05976 |
| Plat    | 2.2 | 0.3 | 0.8 | 0.1 | -2.7 | 0.00452 |
| Smurf1  | 2.2 | 0.3 | 1.3 | 0.1 | -1.7 | 0.05342 |
| Odc1    | 2.2 | 0.3 | 1.1 | 0.1 | -2.1 | 0.01612 |
| Nudt18  | 2.2 | 0.2 | 0.6 | 0.0 | -3.5 | 0.00050 |
| Rad17   | 2.2 | 0.3 | 1.6 | 0.1 | -1.4 | 0.09574 |
| Hs3st1  | 2.2 | 0.3 | 1.3 | 0.3 | -1.7 | 0.06168 |
| Atp6v1h | 2.2 | 0.2 | 1.1 | 0.1 | -2.0 | 0.00439 |
| Rbm22   | 2.2 | 0.4 | 1.6 | 0.2 | -1.3 | 0.21593 |
| Zfyve26 | 2.2 | 0.3 | 1.5 | 0.1 | -1.5 | 0.04175 |
| Rab10   | 2.2 | 0.2 | 1.5 | 0.1 | -1.5 | 0.02185 |
| Ryk     | 2.2 | 0.4 | 1.3 | 0.1 | -1.7 | 0.05729 |

|           |     |     |     |     |      |         |
|-----------|-----|-----|-----|-----|------|---------|
| Id2       | 2.2 | 0.4 | 1.2 | 0.1 | -1.8 | 0.04679 |
| Ythdf1    | 2.2 | 0.2 | 1.5 | 0.1 | -1.4 | 0.04599 |
| Slc25a17  | 2.2 | 0.4 | 1.3 | 0.1 | -1.6 | 0.06942 |
| Otud3     | 2.2 | 0.4 | 1.2 | 0.1 | -1.8 | 0.06587 |
| Bod11     | 2.2 | 0.2 | 1.6 | 0.1 | -1.3 | 0.07103 |
| Atmin     | 2.2 | 0.3 | 1.6 | 0.1 | -1.4 | 0.09376 |
| C5ar1     | 2.2 | 0.3 | 0.7 | 0.1 | -2.9 | 0.00555 |
| Rnf13     | 2.2 | 0.1 | 1.6 | 0.1 | -1.3 | 0.01515 |
| Vps26b    | 2.2 | 0.3 | 1.4 | 0.0 | -1.5 | 0.04715 |
| Fads2     | 2.2 | 0.3 | 0.6 | 0.1 | -3.4 | 0.00247 |
| Dr1       | 2.2 | 0.3 | 1.1 | 0.1 | -1.9 | 0.01292 |
| Iars      | 2.2 | 0.2 | 1.7 | 0.1 | -1.3 | 0.03054 |
| Atf1      | 2.2 | 0.2 | 1.5 | 0.1 | -1.4 | 0.02549 |
| Mphosph10 | 2.2 | 0.1 | 0.9 | 0.1 | -2.4 | 0.00008 |
| Nup54     | 2.2 | 0.4 | 1.6 | 0.2 | -1.3 | 0.31077 |
| Mtmr9     | 2.2 | 0.3 | 1.3 | 0.1 | -1.7 | 0.02336 |
| Tep1      | 2.1 | 0.3 | 1.0 | 0.1 | -2.1 | 0.01029 |
| Sf3b3     | 2.1 | 0.2 | 1.3 | 0.0 | -1.7 | 0.00398 |
| Tapt1     | 2.1 | 0.2 | 1.5 | 0.1 | -1.5 | 0.01373 |
| Dpp8      | 2.1 | 0.2 | 1.6 | 0.1 | -1.3 | 0.06565 |
| Lyve1     | 2.1 | 0.4 | 1.6 | 0.2 | -1.4 | 0.19271 |
| Sdpr      | 2.1 | 0.3 | 1.4 | 0.1 | -1.5 | 0.03484 |
| Arhgef5   | 2.1 | 0.2 | 1.0 | 0.1 | -2.1 | 0.00202 |
| Pnrc2     | 2.1 | 0.2 | 1.4 | 0.1 | -1.5 | 0.03384 |
| Osbp111   | 2.1 | 0.2 | 1.7 | 0.1 | -1.3 | 0.10548 |
| Srp54a    | 2.1 | 0.2 | 1.7 | 0.1 | -1.3 | 0.05953 |
| Efh2      | 2.1 | 0.4 | 0.6 | 0.1 | -3.7 | 0.01657 |
| Tmx1      | 2.1 | 0.1 | 1.4 | 0.1 | -1.5 | 0.00269 |
| Pmp22     | 2.1 | 0.3 | 0.8 | 0.1 | -2.9 | 0.00518 |
| Pvr       | 2.1 | 0.4 | 1.1 | 0.1 | -1.9 | 0.04476 |
| Tmem55a   | 2.1 | 0.4 | 1.5 | 0.1 | -1.4 | 0.16654 |
| Nol9      | 2.1 | 0.2 | 1.1 | 0.1 | -1.9 | 0.00633 |
| Fbx118    | 2.1 | 0.3 | 1.2 | 0.1 | -1.8 | 0.02774 |
| mt-Nd1    | 2.1 | 0.1 | 2.7 | 0.1 | 1.3  | 0.00879 |
| Arf6      | 2.1 | 0.2 | 0.9 | 0.1 | -2.4 | 0.00206 |
| Glb1      | 2.1 | 0.3 | 1.0 | 0.1 | -2.2 | 0.01124 |
| Vhl       | 2.1 | 0.3 | 1.4 | 0.3 | -1.5 | 0.12481 |
| Utp6      | 2.1 | 0.3 | 1.4 | 0.1 | -1.5 | 0.07882 |
| Pramef8   | 2.1 | 0.4 | 1.6 | 0.2 | -1.4 | 0.28820 |
| Fscn1     | 2.1 | 0.3 | 0.3 | 0.0 | -7.0 | 0.00111 |
| Abce1     | 2.1 | 0.2 | 1.4 | 0.1 | -1.5 | 0.00898 |

|          |     |     |     |     |      |         |
|----------|-----|-----|-----|-----|------|---------|
| Nr2f2    | 2.1 | 0.4 | 1.3 | 0.2 | -1.7 | 0.11150 |
| Mtdh     | 2.1 | 0.2 | 1.4 | 0.1 | -1.5 | 0.00555 |
| Freq     | 2.1 | 0.4 | 1.0 | 0.1 | -2.1 | 0.04472 |
| Pim1     | 2.1 | 0.2 | 1.4 | 0.1 | -1.5 | 0.03005 |
| Mlec     | 2.1 | 0.2 | 1.3 | 0.1 | -1.6 | 0.01831 |
| Map4k4   | 2.1 | 0.3 | 1.1 | 0.1 | -1.9 | 0.01528 |
| Adap2    | 2.1 | 0.2 | 1.4 | 0.1 | -1.5 | 0.02236 |
| Zfp282   | 2.1 | 0.2 | 1.1 | 0.1 | -1.9 | 0.00233 |
| Plxnd1   | 2.1 | 0.3 | 0.6 | 0.1 | -3.4 | 0.00436 |
| Hnrnpul2 | 2.1 | 0.2 | 1.4 | 0.1 | -1.5 | 0.02673 |
| H6pd     | 2.1 | 0.3 | 1.6 | 0.1 | -1.3 | 0.18197 |
| Gspt1    | 2.1 | 0.1 | 1.3 | 0.1 | -1.6 | 0.00149 |
| Srsf15   | 2.1 | 0.2 | 1.2 | 0.1 | -1.8 | 0.00349 |
| Ppargc1a | 2.1 | 0.1 | 4.6 | 0.8 | 2.2  | 0.03196 |
| Arhgef18 | 2.1 | 0.3 | 1.5 | 0.1 | -1.4 | 0.08683 |
| Rnf11    | 2.1 | 0.3 | 1.5 | 0.1 | -1.4 | 0.09152 |
| Pkia     | 2.1 | 0.2 | 1.6 | 0.0 | -1.3 | 0.04821 |
| Dcn      | 2.1 | 0.2 | 1.3 | 0.1 | -1.6 | 0.00845 |
| Aggf1    | 2.1 | 0.2 | 1.4 | 0.1 | -1.5 | 0.02683 |
| Gpc4     | 2.1 | 0.1 | 1.5 | 0.3 | -1.4 | 0.13025 |
| Nktr     | 2.1 | 0.2 | 1.4 | 0.1 | -1.5 | 0.00958 |
| Kdm5c    | 2.1 | 0.3 | 1.4 | 0.1 | -1.6 | 0.05831 |
| Tceb3    | 2.1 | 0.2 | 1.5 | 0.1 | -1.4 | 0.03749 |
| Il13ra1  | 2.1 | 0.2 | 1.0 | 0.1 | -2.0 | 0.00354 |
| Adpgk    | 2.1 | 0.3 | 1.0 | 0.1 | -2.1 | 0.01256 |
| Tmem39a  | 2.1 | 0.3 | 0.9 | 0.1 | -2.4 | 0.00831 |
| Tram1    | 2.1 | 0.1 | 1.0 | 0.1 | -2.0 | 0.00010 |
| Tbk1     | 2.1 | 0.3 | 1.4 | 0.2 | -1.5 | 0.08237 |
| Klf13    | 2.1 | 0.3 | 1.1 | 0.1 | -1.9 | 0.03374 |
| Prpf4    | 2.1 | 0.2 | 1.6 | 0.2 | -1.3 | 0.07062 |
| Ivns1abp | 2.1 | 0.2 | 1.4 | 0.1 | -1.5 | 0.00626 |
| Cd248    | 2.1 | 0.4 | 0.5 | 0.1 | -3.9 | 0.00943 |
| Anxa1    | 2.1 | 0.5 | 0.6 | 0.1 | -3.7 | 0.02596 |
| Wwtr1    | 2.1 | 0.2 | 1.1 | 0.1 | -1.8 | 0.00245 |
| Ganab    | 2.1 | 0.1 | 1.4 | 0.1 | -1.5 | 0.00269 |
| Per1     | 2.1 | 0.3 | 1.4 | 0.4 | -1.5 | 0.19649 |
| Cisd2    | 2.1 | 0.1 | 1.7 | 0.1 | -1.3 | 0.02873 |
| Arih1    | 2.1 | 0.2 | 1.3 | 0.1 | -1.6 | 0.00551 |
| Rab5c    | 2.1 | 0.2 | 0.6 | 0.2 | -3.3 | 0.00118 |
| Cmas     | 2.1 | 0.3 | 1.5 | 0.2 | -1.4 | 0.09535 |
| Sec24c   | 2.1 | 0.2 | 1.4 | 0.1 | -1.5 | 0.02255 |

|         |     |     |     |     |      |         |
|---------|-----|-----|-----|-----|------|---------|
| Ier3    | 2.1 | 0.3 | 0.7 | 0.1 | -2.9 | 0.00379 |
| Islr    | 2.1 | 0.4 | 0.6 | 0.1 | -3.3 | 0.01343 |
| Ip6k1   | 2.1 | 0.2 | 1.6 | 0.1 | -1.3 | 0.09569 |
| Pdp2    | 2.1 | 0.2 | 4.4 | 1.0 | 2.1  | 0.06302 |
| Kcnd2   | 2.1 | 0.2 | 2.9 | 0.3 | 1.4  | 0.06014 |
| Plscr1  | 2.1 | 0.4 | 0.9 | 0.1 | -2.3 | 0.01958 |
| Prepl   | 2.1 | 0.1 | 1.6 | 0.1 | -1.3 | 0.04155 |
| Polr3b  | 2.1 | 0.3 | 1.3 | 0.1 | -1.5 | 0.08648 |
| Anp32e  | 2.1 | 0.1 | 1.3 | 0.1 | -1.6 | 0.00189 |
| Nptn    | 2.1 | 0.2 | 1.1 | 0.1 | -1.9 | 0.00557 |
| Arfgap3 | 2.1 | 0.3 | 0.9 | 0.1 | -2.2 | 0.01100 |
| Irgm1   | 2.1 | 0.5 | 0.8 | 0.1 | -2.6 | 0.05734 |
| Fuca2   | 2.1 | 0.3 | 0.9 | 0.1 | -2.2 | 0.00683 |
| Fasn    | 2.1 | 0.4 | 1.4 | 0.3 | -1.5 | 0.14190 |
| Creb3l1 | 2.1 | 0.4 | 0.7 | 0.1 | -3.1 | 0.01964 |
| Hnrnp2  | 2.1 | 0.2 | 1.2 | 0.1 | -1.7 | 0.01334 |
| Zwint   | 2.1 | 0.4 | 1.4 | 0.1 | -1.4 | 0.18517 |
| Arcn1   | 2.1 | 0.2 | 1.5 | 0.1 | -1.4 | 0.04010 |
| Id1     | 2.1 | 0.2 | 1.2 | 0.1 | -1.8 | 0.00230 |
| Igf2r   | 2.1 | 0.3 | 1.3 | 0.1 | -1.6 | 0.06958 |
| Dusp11  | 2.1 | 0.3 | 1.4 | 0.1 | -1.4 | 0.05992 |
| Gtf2b   | 2.1 | 0.2 | 1.4 | 0.2 | -1.5 | 0.03952 |
| Metap1  | 2.1 | 0.2 | 1.4 | 0.1 | -1.5 | 0.04052 |
| Lpin1   | 2.1 | 0.2 | 2.7 | 0.2 | 1.3  | 0.08019 |
| Wls     | 2.1 | 0.2 | 1.1 | 0.1 | -1.8 | 0.00934 |
| Fbxo38  | 2.1 | 0.2 | 1.4 | 0.1 | -1.4 | 0.03779 |
| Ube3c   | 2.1 | 0.2 | 1.6 | 0.1 | -1.3 | 0.05714 |
| St3gal1 | 2.0 | 0.3 | 1.4 | 0.1 | -1.5 | 0.09115 |
| Canx    | 2.0 | 0.2 | 1.6 | 0.1 | -1.3 | 0.09766 |
| Tusc3   | 2.0 | 0.2 | 1.3 | 0.1 | -1.6 | 0.00942 |
| Polr3k  | 2.0 | 0.8 | 1.1 | 0.4 | -1.8 | 0.32709 |
| Pdgfrb  | 2.0 | 0.2 | 1.0 | 0.1 | -2.1 | 0.00066 |
| Nck1    | 2.0 | 0.2 | 1.4 | 0.1 | -1.5 | 0.04051 |
| Slc35a4 | 2.0 | 0.3 | 1.4 | 0.1 | -1.5 | 0.05856 |
| Peyox1  | 2.0 | 0.3 | 1.1 | 0.1 | -1.9 | 0.03616 |
| Sri     | 2.0 | 0.2 | 0.9 | 0.1 | -2.3 | 0.00166 |
| Pank1   | 2.0 | 0.1 | 2.7 | 0.3 | 1.3  | 0.10214 |
| G3bp2   | 2.0 | 0.3 | 1.4 | 0.1 | -1.5 | 0.06954 |
| Sec22b  | 2.0 | 0.3 | 1.3 | 0.1 | -1.5 | 0.09586 |
| Ptbp1   | 2.0 | 0.2 | 0.9 | 0.1 | -2.2 | 0.00315 |
| Ergic1  | 2.0 | 0.3 | 1.1 | 0.1 | -1.8 | 0.01767 |

|            |     |     |     |     |      |         |
|------------|-----|-----|-----|-----|------|---------|
| Dusp18     | 2.0 | 0.3 | 3.6 | 0.4 | 1.8  | 0.02070 |
| Adrbk1     | 2.0 | 0.2 | 1.3 | 0.1 | -1.5 | 0.02247 |
| Zfp366     | 2.0 | 0.2 | 0.8 | 0.1 | -2.5 | 0.00235 |
| Ift52      | 2.0 | 0.2 | 1.1 | 0.2 | -1.8 | 0.01404 |
| Fbxl14     | 2.0 | 0.2 | 1.1 | 0.1 | -1.8 | 0.01042 |
| Emp2       | 2.0 | 0.3 | 1.4 | 0.1 | -1.5 | 0.06969 |
| Tspy11     | 2.0 | 0.2 | 1.6 | 0.1 | -1.3 | 0.04673 |
| Nlrp10     | 2.0 | 0.2 | 1.5 | 0.1 | -1.3 | 0.03437 |
| Prps1      | 2.0 | 0.2 | 1.3 | 0.2 | -1.6 | 0.02448 |
| Etv3       | 2.0 | 0.2 | 1.4 | 0.0 | -1.5 | 0.01173 |
| Pomt2      | 2.0 | 0.2 | 1.2 | 0.1 | -1.6 | 0.01118 |
| Dusp22     | 2.0 | 0.3 | 1.5 | 0.2 | -1.4 | 0.15958 |
| Ccdc141    | 2.0 | 0.3 | 2.6 | 0.2 | 1.3  | 0.17114 |
| Khsrp      | 2.0 | 0.2 | 1.2 | 0.1 | -1.7 | 0.00537 |
| Lmnb2      | 2.0 | 0.4 | 0.7 | 0.0 | -2.9 | 0.01653 |
| Lgals9     | 2.0 | 0.3 | 0.4 | 0.1 | -5.0 | 0.00173 |
| Lmod2      | 2.0 | 0.2 | 1.3 | 0.1 | -1.6 | 0.00840 |
| Ckap4      | 2.0 | 0.4 | 0.6 | 0.1 | -3.4 | 0.02382 |
| Snx2       | 2.0 | 0.2 | 1.4 | 0.1 | -1.5 | 0.02053 |
| Swap70     | 2.0 | 0.2 | 1.0 | 0.1 | -1.9 | 0.00501 |
| Cyb561d1   | 2.0 | 0.3 | 1.4 | 0.2 | -1.4 | 0.09439 |
| S1pr3      | 2.0 | 0.2 | 1.0 | 0.1 | -2.0 | 0.00356 |
| Psen1      | 2.0 | 0.2 | 1.3 | 0.0 | -1.6 | 0.00466 |
| Xrcc2      | 2.0 | 0.3 | 1.4 | 0.3 | -1.5 | 0.15852 |
| BX547995.1 | 2.0 | 0.7 | 1.2 | 0.3 | -1.7 | 0.28928 |
| Igsf3      | 2.0 | 0.2 | 1.6 | 0.1 | -1.3 | 0.11642 |
| Hk2        | 2.0 | 0.2 | 1.5 | 0.1 | -1.3 | 0.09738 |
| Gltp       | 2.0 | 0.3 | 0.7 | 0.1 | -2.8 | 0.00612 |
| Serinc3    | 2.0 | 0.1 | 1.4 | 0.1 | -1.5 | 0.00457 |
| Heatr6     | 2.0 | 0.3 | 1.4 | 0.2 | -1.4 | 0.16624 |
| Ctps       | 2.0 | 0.3 | 1.0 | 0.1 | -2.1 | 0.01214 |
| Glud1      | 2.0 | 0.2 | 1.4 | 0.1 | -1.4 | 0.05982 |
| Sema7a     | 2.0 | 0.2 | 0.9 | 0.1 | -2.3 | 0.00194 |
| Pdzd2      | 2.0 | 0.3 | 2.5 | 0.2 | 1.3  | 0.13879 |
| Slc2a1     | 2.0 | 0.4 | 0.8 | 0.1 | -2.6 | 0.02772 |
| Prdm4      | 2.0 | 0.2 | 1.3 | 0.1 | -1.6 | 0.01904 |
| Ino80      | 2.0 | 0.2 | 1.3 | 0.1 | -1.5 | 0.00598 |
| Trf        | 2.0 | 0.3 | 0.8 | 0.1 | -2.6 | 0.00825 |
| Cny        | 2.0 | 0.1 | 1.3 | 0.1 | -1.5 | 0.00406 |
| Cnksr3     | 2.0 | 0.1 | 1.4 | 0.2 | -1.5 | 0.02907 |
| Pbx2       | 2.0 | 0.2 | 1.3 | 0.1 | -1.6 | 0.00638 |

|          |     |     |     |     |      |         |
|----------|-----|-----|-----|-----|------|---------|
| Gosr1    | 2.0 | 0.2 | 1.5 | 0.2 | -1.3 | 0.14068 |
| Pfas     | 2.0 | 0.2 | 1.3 | 0.1 | -1.5 | 0.02081 |
| Dctn4    | 2.0 | 0.2 | 1.5 | 0.1 | -1.3 | 0.06061 |
| Samd4b   | 2.0 | 0.3 | 1.1 | 0.0 | -1.9 | 0.01407 |
| Cd164    | 2.0 | 0.1 | 1.6 | 0.1 | -1.3 | 0.02806 |
| Zfp746   | 2.0 | 0.2 | 1.1 | 0.1 | -1.7 | 0.01588 |
| Tfdp2    | 2.0 | 0.4 | 3.6 | 0.4 | 1.8  | 0.02712 |
| Zxdc     | 2.0 | 0.2 | 1.5 | 0.2 | -1.3 | 0.05170 |
| Nckap5l  | 2.0 | 0.4 | 0.6 | 0.1 | -3.5 | 0.00987 |
| Rhbdf2   | 2.0 | 0.3 | 0.7 | 0.1 | -2.8 | 0.00849 |
| Sdccag1  | 2.0 | 0.2 | 1.5 | 0.1 | -1.3 | 0.05623 |
| Zfyve20  | 2.0 | 0.3 | 1.4 | 0.2 | -1.4 | 0.15608 |
| Ranbp10  | 2.0 | 0.2 | 1.2 | 0.1 | -1.7 | 0.01226 |
| Slc44a2  | 2.0 | 0.2 | 1.3 | 0.1 | -1.5 | 0.01171 |
| Cstf3    | 2.0 | 0.2 | 1.1 | 0.2 | -1.7 | 0.01222 |
| Taf2     | 2.0 | 0.2 | 1.3 | 0.1 | -1.6 | 0.03110 |
| Ubqln2   | 2.0 | 0.2 | 1.3 | 0.1 | -1.5 | 0.03807 |
| Zfp180   | 2.0 | 0.2 | 1.6 | 0.1 | -1.3 | 0.08665 |
| Sh3pxd2a | 2.0 | 0.5 | 1.1 | 0.1 | -1.7 | 0.15129 |
| Upf2     | 2.0 | 0.3 | 1.3 | 0.2 | -1.5 | 0.09601 |
| Rars     | 2.0 | 0.2 | 1.1 | 0.1 | -1.8 | 0.00418 |
| Nrbf2    | 2.0 | 0.5 | 1.1 | 0.2 | -1.8 | 0.12504 |
| Sdc4     | 2.0 | 0.5 | 1.1 | 0.1 | -1.8 | 0.12451 |
| Gbf1     | 2.0 | 0.2 | 1.4 | 0.0 | -1.4 | 0.02788 |
| Galm     | 2.0 | 0.2 | 2.8 | 0.3 | 1.4  | 0.07602 |
| Nars     | 2.0 | 0.3 | 1.1 | 0.1 | -1.7 | 0.02419 |
| Erbp2    | 2.0 | 0.3 | 1.0 | 0.1 | -1.9 | 0.01268 |
| Taf5l    | 2.0 | 0.3 | 1.2 | 0.1 | -1.6 | 0.08637 |
| Pmepal   | 2.0 | 0.3 | 0.9 | 0.1 | -2.1 | 0.02162 |
| Gusb     | 2.0 | 0.3 | 0.5 | 0.1 | -4.1 | 0.00540 |
| Fads1    | 2.0 | 0.3 | 0.7 | 0.1 | -2.7 | 0.00352 |
| Exoc8    | 2.0 | 0.2 | 1.1 | 0.1 | -1.8 | 0.01293 |
| Lgmn     | 2.0 | 0.3 | 0.7 | 0.1 | -2.8 | 0.01251 |
| Glyr1    | 2.0 | 0.2 | 1.2 | 0.1 | -1.6 | 0.01119 |
| Dnajc18  | 2.0 | 0.2 | 1.3 | 0.1 | -1.5 | 0.01848 |
| Ptrf     | 2.0 | 0.3 | 0.9 | 0.1 | -2.2 | 0.00926 |
| Syde1    | 2.0 | 0.1 | 1.3 | 0.1 | -1.5 | 0.00497 |
| Spsb4    | 2.0 | 0.4 | 0.6 | 0.2 | -3.4 | 0.01641 |
| Tmem128  | 2.0 | 0.2 | 1.4 | 0.1 | -1.4 | 0.03446 |
| Dstn     | 2.0 | 0.2 | 1.1 | 0.1 | -1.9 | 0.00247 |
| Slc46a3  | 2.0 | 0.6 | 1.4 | 0.3 | -1.4 | 0.41209 |

|        |     |     |     |     |      |         |
|--------|-----|-----|-----|-----|------|---------|
| Nploc4 | 2.0 | 0.2 | 1.2 | 0.1 | -1.6 | 0.02162 |
| Map3k3 | 2.0 | 0.2 | 1.1 | 0.1 | -1.8 | 0.00911 |

**Supplemental Table S4. Biological functions of RISC-associated vs RISC-independent cardiac mRNAs**

| Protein class                 | Actual | n    | R     | N     | Expected | Ratio  | p-value   | z-score   | % in data set | % in protein function | % protein function in database |
|-------------------------------|--------|------|-------|-------|----------|--------|-----------|-----------|---------------|-----------------------|--------------------------------|
| <b>RISC-associated mRNAs</b>  |        |      |       |       |          |        |           |           |               |                       |                                |
| Enzymes                       | 161    | 1306 | 2623  | 20322 | 168.6    | 0.9551 | 2.752E-01 | -0.6457   | 12.33%        | 6.14%                 | 12.91%                         |
| Kinases                       | 79     | 1306 | 624   | 20322 | 40.1     | 1.97   | 5.327E-09 | 6.45      | 6.05%         | 12.66%                | 3.07%                          |
| Ligands                       | 27     | 1306 | 467   | 20322 | 30.01    | 0.8996 | 3.232E-01 | -0.575    | 2.07%         | 5.78%                 | 2.30%                          |
| Phosphatases                  | 35     | 1306 | 221   | 20322 | 14.2     | 2.464  | 6.726E-07 | 5.736     | 2.68%         | 15.84%                | 1.09%                          |
| Proteases                     | 44     | 1306 | 545   | 20322 | 35.02    | 1.256  | 7.021E-02 | 1.589     | 3.37%         | 8.07%                 | 2.68%                          |
| Receptors                     | 86     | 1306 | 1426  | 20322 | 91.64    | 0.9384 | 2.855E-01 | -0.6319   | 6.58%         | 6.03%                 | 7.02%                          |
| Transcription factors         | 93     | 1306 | 890   | 20322 | 57.2     | 1.626  | 2.211E-06 | 5.005     | 7.12%         | 10.45%                | 4.38%                          |
| Other                         | 794    | 1306 | 13577 | 20322 | 872.5    | 0.91   | 1.406E-06 | -4.77     | 60.80%        | 5.85%                 | 66.81%                         |
| <b>RISC-independent mRNAs</b> |        |      |       |       |          |        |           |           |               |                       |                                |
| Enzymes                       | 405    | 2090 | 2623  | 20322 | 269.8    | 1.501  | 6.300E-19 | 9.315     | 19.38%        | 15.44%                | 12.91%                         |
| Kinases                       | 86     | 2090 | 624   | 20322 | 64.17    | 1.34   | 2.968E-03 | 2.921     | 4.11%         | 13.78%                | 3.07%                          |
| Ligands                       | 48     | 2090 | 467   | 20322 | 48.03    | 0.9994 | 5.367E-01 | -0.004353 | 2.30%         | 10.28%                | 2.30%                          |
| Phosphatases                  | 34     | 2090 | 221   | 20322 | 22.73    | 1.496  | 1.112E-02 | 2.51      | 1.63%         | 15.38%                | 1.09%                          |
| Transcription factors         | 103    | 2090 | 890   | 20322 | 91.53    | 1.125  | 1.091E-01 | 1.294     | 4.93%         | 11.57%                | 4.38%                          |
| Proteases                     | 51     | 2090 | 545   | 20322 | 56.05    | 0.9099 | 2.611E-01 | -0.7219   | 2.44%         | 9.36%                 | 2.68%                          |
| Receptors                     | 113    | 2090 | 1426  | 20322 | 146.7    | 0.7705 | 1.002E-03 | -3.043    | 5.41%         | 7.92%                 | 7.02%                          |
| Other                         | 1252   | 2090 | 13577 | 20322 | 1396     | 0.8966 | 1.687E-12 | -7.077    | 59.90%        | 9.22%                 | 66.81%                         |

RISC-associated and RISC-independent mRNAs were analyzed using an ‘Enrichment by protein function’ analysis in MetaCore (<http://www.genego.com>).

Table columns have the following meaning:

|                      |                                    |
|----------------------|------------------------------------|
| <b>Protein class</b> | a broadly defined protein function |
|----------------------|------------------------------------|



|                                     |                                                                                                                       |
|-------------------------------------|-----------------------------------------------------------------------------------------------------------------------|
| <b>Actual</b>                       | number of genes in the gene list for a given protein class                                                            |
| <b>n</b>                            | number of genes in the gene list                                                                                      |
| <b>R</b>                            | number of genes for a given protein class in the complete MetaCore database                                           |
| <b>N</b>                            | total number of genes in the complete MetaCore datgabase                                                              |
| <b>Expected</b>                     | mean value for hypergeometric distribution ( $n \cdot R / N$ )                                                        |
| <b>Ratio</b>                        | connectivity ratio (Actual/Expected)                                                                                  |
| <b>z-score</b>                      | z-score ((Actual-Expected)/sqrt(variance))                                                                            |
| <b>p-value</b>                      | probability to have the given value of Actual or higher (or lower for negative z-score)                               |
| <b>In data set</b>                  | % of genes with a selected function in the gene list                                                                  |
| <b>In protein function</b>          | % of genes with a selected function in the gene list among genes with this function in the complete MetaCore database |
| <b>Protein function in database</b> | % of genes with a selected function in the complete MetaCore database                                                 |

| <b>Supplemental Table S5. GO categorization by biological function</b> |                                             |
|------------------------------------------------------------------------|---------------------------------------------|
| <b>Gene Ontology ID</b>                                                | <b>Description</b>                          |
| <b>cardiac contraction/calcium signaling</b>                           |                                             |
| 0005509                                                                | calcium ion binding                         |
| 0055074                                                                | calcium ion homeostasis                     |
| 0043292                                                                | contractile fiber                           |
| 0048634                                                                | regulation of muscle organ development      |
| 0001944                                                                | vasculature development                     |
| 0001725                                                                | stress fiber                                |
| 0001568                                                                | blood vessel development                    |
| 0048738                                                                | cardiac muscle tissue development           |
| <b>cell cycle</b>                                                      |                                             |
| 0051726                                                                | regulation of cell cycle                    |
| 0007049                                                                | cell cycle                                  |
| <b>cell motion</b>                                                     |                                             |
| 0016477                                                                | cell migration                              |
| 0007018                                                                | microtubule-based movement                  |
| 0006928                                                                | cellular component movement                 |
| <b>cell adhesion</b>                                                   |                                             |
| 0007155                                                                | cell adhesion                               |
| 0031012                                                                | extracellular matrix                        |
| 0022610                                                                | biological adhesion                         |
| 0030155                                                                | regulation of cell adhesion                 |
| <b>cytoskeleton</b>                                                    |                                             |
| 0005856                                                                | cytoskeleton                                |
| 0007010                                                                | cytoskeleton organization                   |
| 0005583                                                                | fibrillar collagen                          |
| <b>differentiation/proliferation</b>                                   |                                             |
| 0050678                                                                | regulation of epithelial cell proliferation |
| 0048634                                                                | regulation of muscle organ development      |
| 0060429                                                                | epithelium development                      |
| 0001501                                                                | skeletal system development                 |
| 0008284                                                                | positive regulation of cell proliferation   |
| 0007517                                                                | muscle organ development                    |
| 0008283                                                                | cell proliferation                          |
| 0045444                                                                | fat cell differentiation                    |
| <b>homeostasis</b>                                                     |                                             |
| 0055074                                                                | calcium ion homeostasis                     |
| 0043167                                                                | ion binding                                 |
| 0046872                                                                | metal ion binding                           |
| <b>lysosome/proteolysis</b>                                            |                                             |

|                                |                                                 |
|--------------------------------|-------------------------------------------------|
| 0006508                        | proteolysis                                     |
| 0005764                        | lysosome                                        |
| <b>metabolism</b>              |                                                 |
| 0006732                        | coenzyme metabolic process                      |
| 0006631                        | fatty acid metabolic process                    |
| 0006006                        | glucose metabolic process                       |
| 0006796                        | phosphate-containing compound metabolic process |
| 0009891                        | positive regulation of biosynthetic process     |
| 0006091                        | generation of precursor metabolites and energy  |
| 0051174                        | regulation of phosphorus metabolic process      |
| 0055114                        | oxidation-reduction process                     |
| 0006754                        | ATP biosynthetic process                        |
| 0044271                        | cellular nitrogen compound biosynthetic process |
| <b>programmed cell death</b>   |                                                 |
| 0043067                        | regulation of programmed cell death             |
| 0012501                        | programmed cell death                           |
| 0008219                        | cell death                                      |
| 0042981                        | regulation of apoptotic process                 |
| 0043066                        | negative regulation of apoptotic process        |
| <b>transcription</b>           |                                                 |
| 0006355                        | regulation of transcription, DNA-dependent      |
| <b>vesicle/cell projection</b> |                                                 |
| 0042995                        | cell projection                                 |
| 0043228                        | non-membrane-bounded organelle                  |
| 0046907                        | intracellular transport                         |
| 0043232                        | intracellular non-membrane-bounded organelle    |
| 0030030                        | cell projection organization                    |
| 0031982                        | vesicle                                         |
| 0006897                        | endocytosis                                     |
| 0046907                        | intracellular transport                         |
| 0016192                        | vesicle-mediated transport                      |

**Supplemental Table S5.** *Gene Ontology category groups used for characterization of cardiac function.* Gene Ontology IDs and descriptions, grouped by categories used in Figure 4, Supplemental Figure 4 and Supplemental Figure 5.

## Supplemental Materials and Methods

**Mouse heart modeling.** Mouse hearts were hemodynamically stressed by surgical coarctation of the transverse aorta, inducing reactive left ventricular hypertrophy that develops over a five-week period (1, 2). The current studies were designed to measure changes in cardiac gene expression that drive this universal hypertrophic response. Accordingly, we studied hearts at a time (1 week after surgical modeling) when ongoing hypertrophy is active and the mice have recovered from the stress of surgery (3, 4).

**microRNA sequencing.** Deep sequencing is currently the most accurate technique for quantifying (large or small) RNAs. We and many others have directly compared deep RNA sequencing to microarrays (5-23). In almost all instances RNA-sequencing was found to be superior to microarrays. In the other few instances the two techniques were judged to be equivalent.

Comparing microRNA levels in different experimental conditions or disease states requires normalization of microRNA abundance to an unregulated internal factor (24). 5S rRNA is commonly used for this purpose (25), but is not included in microRNA sequencing libraries. Also 5S rRNA levels can potentially vary with demands for increased protein production (26). Thus, we identified a set of ten cardiac microRNAs whose abundance was consistent between individual hearts and not changed by pressure overload (**Methods Figures 1a and 1b**), and normalized each of the microRNA sequence studies to these internal references.

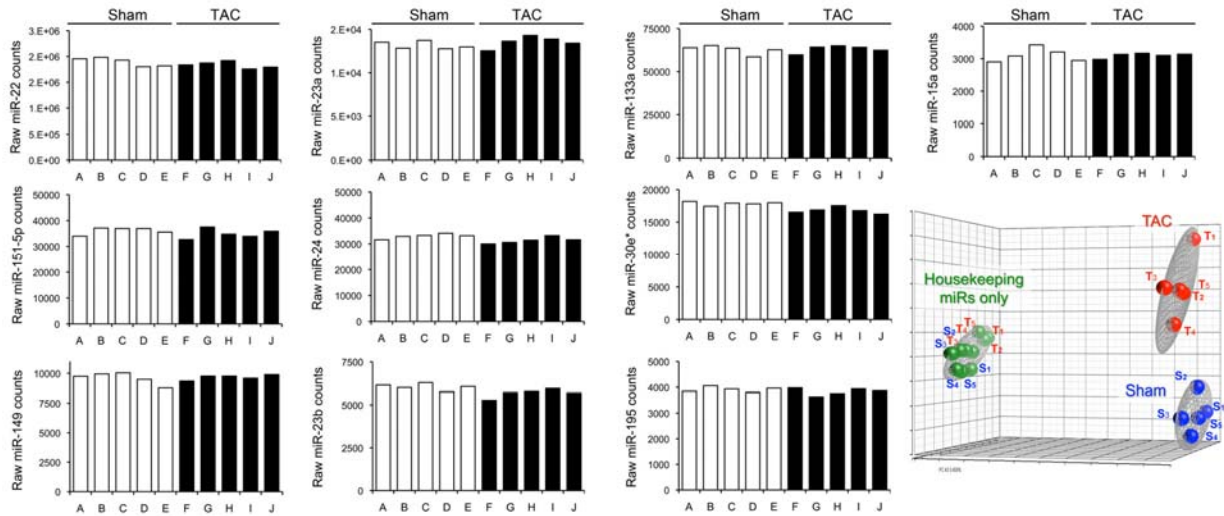

**Methods Figure 1.** Expression characteristics of non-regulated reference cardiac microRNAs. **A.** Comparative expression levels (sequence reads/10,000,000 reads) for ten reference cardiac microRNAs in sham-operated (white bars, hearts A-E) and pressure-overloaded (TAC; black bars, hearts F-J) mouse hearts. **B.** Principal components analysis of microRNA expression profiles in TAC (red) and sham (blue) hearts, compared to expression of reference microRNAs only (green).

We categorized cardiac microRNAs as highly expressed (n=144 with >400 reads per sample) or moderately expressed (n=266 with 5-399 reads per sample) and defined significant regulation for each group as an increase or decrease by >25% in pressure overloaded hearts, false discovery rate (FDR) of 0.02.

MicroRNAs can be packaged and secreted in exosomes as a form of epigenetic communication between cells or tissues (27). We considered that microRNA isolation and deep sequencing from total cardiac RNA might not distinguish between a bioactive population of microRNAs incorporated into the RISC apparatus, and those that might be sequestered for cellular export. To better define those microRNAs that regulate mRNA expression we isolated myocardial RISC complexes by immunoprecipitation of Argonaute 2 (28), extracted the associated microRNAs, and profiled them by deep sequencing. Comparative analysis of the total and RISC-associated miR fractions is presented in **Supplemental Figure S4**.

**RNA Sequencing.** mRNA sequencing was performed essentially as described (23, 28), except we used Illumina HiSeq 2000 sequencers and library indexing rather than bar-coding. The total number of indexed mRNA sequence reads from the 12 cardiac transcriptome libraries was 188 million, of which 156 million (83.1%) aligned to NCBI release 37 of the mouse genome. The alignment percentage of RNA extracted from Argonaute 2 immunoprecipitates (the RISCome) was 64.3% (146 million aligned reads among 227 million raw reads). Sham-operated and pressure overloaded mouse heart mRNA-sequences aligned to 26,120 different annotated RNA elements (including noncoding RNA and microRNA precursors) in the NCBI mouse genome (Release 37). Of these, 19,331 (74%) were coding mRNAs; the remaining sequences corresponded to ribosomal and transfer RNAs. Using prior criteria that a meaningfully expressed transcript should be present at a level equivalent to at least 1 mRNA copy/cell (3 FPKM; fragment [reads] per kilobase of exon per million mapped reads) (23, 29), we identified 8,384 coding mRNAs (~43% of the mouse transcriptome) expressed in sham-operated hearts; aortic banding did not meaningfully change this number (8,676 coding mRNAs). Concordance of these cardiac transcriptomes with those from previous RNA-Seq studies was high (23, 28, 30-33).

Highly abundant cardiac mRNAs tend to encode contractile, structural, and mitochondrial proteins whereas transcriptional regulators are expressed at comparatively low levels (23, 34). We identified 787 highly abundant cardiac mRNAs (>100 FPKM; >33 copies/cell), 1,758 moderately abundant cardiac mRNAs (30-99 FPKM; 10-32 copies/cell) and 5,820 low abundance cardiac mRNAs (3-29 FPKM; 1-10 copies/cell).

For microRNA deep sequencing (miR-Seq), libraries were prepared with TruSeq Small RNA Sample Prep Kits (Illumina) following the manufacturer's protocols. Briefly, small RNAs from 1 µg total mouse heart RNA were sequentially ligated with 3' and 5' adapters, followed by reverse transcription to produce single stranded cDNAs, which were then amplified by PCR with RNA PCR primer and indexing primer. The amplified libraries were size-selected/gel-purified and quantified (**Methods Figure 2**). Twelve libraries were pooled in equimolar (10 nmol/L) amounts and diluted to 14 pmol/L for cluster formation on a single flow cell lane, followed by single-end sequencing on an Illumina HiSeq 2000 sequencer. The analysis of microRNA deep sequencing

was performed by following the E-miR pipeline as described (35) with minor modifications to allow the Bowtie aligner to correctly map those miRs that arise from multiple genomic loci. The total number of reads from 12 miR-Seq libraries was 162 million; 123 million (75.7%) of all reads aligned to microRNAs.

### microRNA library amplification from total mouse heart RNA

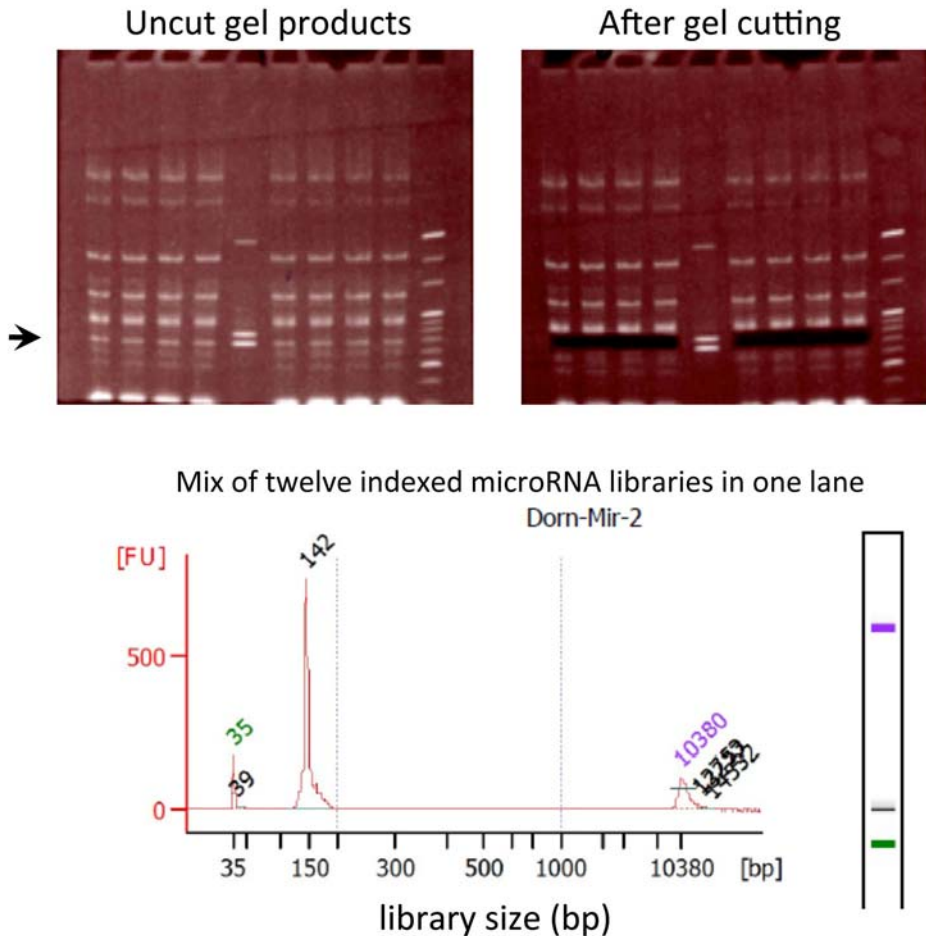

**Methods Figure 2.** Preparation of microRNA sequencing libraries from mouse hearts. Top panels show agarose gel size-separated small RNA library after amplification. Arrow indicates proper size for microRNAs. Left is before gel cutting, right is after gel cutting. Bottom panel shows library size pherogram of DNA extracted from cut gel, illustrating enrichment in ~142 bp microRNA sequencing products.

Ten reference microRNAs used for cross-study normalization were identified using methods adapted from standard RT-qPCR normalization (24, 36). Reference microRNAs were selected over a range of absolute abundance, each with expression that showed no significant differences among the samples regardless of experimental condition, i.e. geometric coefficient of variation (geometric SD/mean) was  $<0.05$  in TAC and sham operated hearts. Individual microRNA reads

in each microRNA library were adjusted to the sum of reads of the ten reference microRNAs in that library. These sequencing data, corrected for individual library sequencing depth and adjusted for the reference microRNAs, are reported as “reads”.

Cardiac mRNAs and microRNAs regulated in response to pressure overloading were defined using a threshold of 25% (increased or decreased) and a FDR of 0.02 for each abundance category.

**Modeling of miR-Seq and RNA-Seq data variance at different sample sizes.** We determined the optimal number of biological replicates needed to determine differential expression of a single mRNA or microRNA from genome-wide expression data (37) by modeling shot noise and biological variance of n=3, 5, 7, and 9 biological replicates using the DESeq package (38) to calculate the degree of variance for each individual miR or mRNA from our own mouse heart RNA-Seq and microRNA-Seq data in closely matched control and aortic banded hearts, using sequencing libraries prepared concurrently and run simultaneously on Illumina HiSeq machines. Based on these data, the current study was performed on N=5 biological replicates per treatment group.

**microRNA RT-qPCR.** Total RNA was extracted from sham and TAC operated hearts using TRIzol. For the data shown in **Supplemental Figure S2**, RT-PCR used NCode miRNA First-Strand cDNA Synthesis and qRT-PCR kits (Invitrogen). Briefly, microRNAs were polyadenylated and reverse transcribed with a universal primer. First strand cDNAs were amplified using an Invitrogen-supplied universal qPCR reverse primer with a forward primer designed to target the specific microRNA sequence of interest. Relative expression was evaluated by the delta Ct (cycle threshold) method, normalizing to 5S rRNA. The primer specific to miR-16 was 5'-TAGCAGCACGTAAATATTGGCG-3'; to miR-22 was 5'-AAGCTGCCAGTTGAAGAAGTGT-3'; to miR-26a was 5'-TTCAAGTAATCCAGGATAGGCT-3'; to miR-1 was 5'-TGGAATGTAAAGAAGTATGTATAAAA-3'; and to 5S rRNA was 5'-AATACCGGGTGC TGTAGGCTTT-3'. Identities of PCR products were validated using Sanger sequencing.

For TR-qPCR confirmation of relative microRNA levels shown in **Figure 2d and Supplemental Figure 3b**, the NCode method was used to examine miR-1 and miR-27b (primer sequence 5'-TTCACAGTGGCTAAGTTCTGC-3'). All other miRs were examined using TaqMan MicroRNA Expression Assays (Applied Biosystems) on Trizol-extracted total RNA. Expression of each miR was determined by the delta Ct method, against the geometric mean of 12 unregulated reference miRs as described (36).

**Proteomics.** Sixty µg mouse ventricular homogenates of sham or TAC operated heart were labeled with Cy3 or Cy5 dyes (GE Healthcare), mixed and resolved in the first dimension on a pH gradient from 4 to 9, and the second dimension on 12% SDS-PAGE (Applied Biomix, Hayward, CA). Proteins were visualized using a Typhoon TRIO Laser Scanner and Image

QuanTL. In-gel analysis of differential protein expression used DeCyder software. Protein identification was by MALDI-TOF mass spectrometry and/or comparisons with a murine heart proteome atlas (39).

**Gene functional analyses.** Gene-ontology assignment was performed using BiNGO or DAVID Functional Annotation Bioinformatics Microarray analysis, as indicated. Categorical descriptors assigned to Gene Ontology ID numbers are in **Supplemental Table S5**. Statistically significant over-representation of GO categories was determined using hypergeometric testing and Benjamini-Hochberg false discovery rate adjustment in BiNGO (40). The online software suite MetaCore (<http://www.genego.com>) was used to compare actual to predicted RNA abundance in individual categories according to hypergeometric distribution.

**Prediction of miR-mRNA interactions using TAC-regulated miRs and mRNAs.** Whole-genome miR-mRNA prediction engines such as TargetScan necessarily sacrifice sensitivity in order to achieve a measure of specificity when predicting possible miR-mRNA interactions from all known miRs and mRNAs; tissue-specific expression patterns and expression levels are not taken into account. Previously, we described a search algorithm to determine miR-499 and mutant miR-499 binding sites in a set of cardiac mRNAs regulated by miR-499-programmed RISCs (41). We have expanded on this approach to develop a program in Perl (FastamiRs) that accesses the Smith-Waterman matching algorithm (42) in the Fasta package to determine all possible Watson-Crick hybridization events between a set of experimentally regulated miRs and a set of regulated mRNAs. These predictions are performed without any bias toward the ‘seed’ region of miRs, and thus FastamiRs represents a complementary approach to predictions which favor ‘seed’ sequence homology. The output of FastamiRs is configurable for the number of ‘seed’ nucleotides required, the number of contiguously bound nucleotides, the number of gaps in the alignment, and whether G:U nucleotide pairs are considered. FastamiRs is configurable for any miR sequence and for mRNA from any organism. For the analyses presented in this paper we set a requirement for binding of at least 5 out of 6 miR ‘seed’ nucleotides, at least one stretch of contiguous binding of 6 nucleotides, allowed for the possibility of G:U binding (43) and limited our search to the 3’ UTR of mRNAs.

The software is available at <http://epigenomics.wustl.edu/edwardsLab/index.php/downloads> and requires the use of the Perl language (Unix/Linux, Mac OS X or a Windows unix emulator such as Cygwin), together with an existing installation of the Fasta package referred to above. As input, the user supplies a tab-delimited file of miR names and sequences, together with a fasta-format file containing the names and sequences of the mRNAs to be searched.



## Supplemental Methods References

1. Sakata Y, Hoit BD, Liggett SB, Walsh RA, Dorn GW 2nd (1998) Decompensation of pressure-overload hypertrophy in G alpha q-overexpressing mice. *Circulation* 97:1488-1495.
2. Diwan A, et al. (2008) Nix-mediated apoptosis links myocardial fibrosis, cardiac remodeling, and hypertrophy decompensation. *Circulation* 117:396-404.
3. Park JY, et al. (2011) Comparative analysis of mRNA isoform expression in cardiac hypertrophy and development reveals multiple post-transcriptional regulatory modules. *PLoS One* 6:e22391.
4. Tatsuguchi M, et al. (2007) Expression of microRNAs is dynamically regulated during cardiomyocyte hypertrophy. *J Mol Cell Cardiol* 42:1137-1141.
5. Marioni JC, Mason CE, Mane SM, Stephens M, Gilad Y (2008) RNA-seq: an assessment of technical reproducibility and comparison with gene expression arrays. *Genome Res* 18:1509-1517.
6. Asmann YW, et al. (2009) 3' tag digital gene expression profiling of human brain and universal reference RNA using Illumina Genome Analyzer. *BMC Genomics* 10:531.
7. Fu X, et al. (2009) Estimating accuracy of RNA-Seq and microarrays with proteomics. *BMC Genomics* 10:161.
8. Mane SP, et al. (2009) Transcriptome sequencing of the Microarray Quality Control (MAQC) RNA reference samples using next generation sequencing. *BMC Genomics* 10:264.
9. Feng L, et al. (2010) Power of deep sequencing and agilent microarray for gene expression profiling study. *Mol Biotechnol* 45:101-110.
10. Woodhouse SD, et al. (2010) Transcriptome sequencing, microarray, and proteomic analyses reveal cellular and metabolic impact of hepatitis C virus infection in vitro. *Hepatology* 52:443-453.
11. Brooks MJ, Rajasimha HK, Roger JE, Swaroop A (2011) Next-generation sequencing facilitates quantitative analysis of wild-type and Nrl(-/-) retinal transcriptomes. *Mol Vision* 17:3034-3054.
12. Chen H, et al. (2011) Genome-Wide Gene Expression Profiling of Nucleus Accumbens Neurons Projecting to Ventral Pallidum Using both Microarray and Transcriptome Sequencing. *Front Neurosci* 5:98.
13. Frank S, et al. (2011) *Pseudomonas putida* KT2440 genome update by cDNA sequencing and microarray transcriptomics. *Environ Microbiol* 13:1309-1326.
14. Lahiry P, et al. (2011) Transcriptional profiling of endocrine cerebro-osteodysplasia using microarray and next-generation sequencing. *PLoS One* 6:e25400.
15. Liu P, et al. (2011) Transcriptome profiling and sequencing of differentiated human hematopoietic stem cells reveal lineage-specific expression and alternative splicing of genes. *Physiol Genomics* 43:1117-1134.
16. Llorens F, et al. (2011) Multiple platform assessment of the EGF dependent transcriptome by microarray and deep tag sequencing analysis. *BMC Genomics* 12:326.
17. Roy NC, Altermann E, Park ZA, McNabb WC (2011) A comparison of analog and Next-Generation transcriptomic tools for mammalian studies. *Briefings Funct Genomics* 10:135-150.

18. Thiagarajan RD, et al. (2011) Refining transcriptional programs in kidney development by integration of deep RNA-sequencing and array-based spatial profiling. *BMC Genomics* 12:441.
19. Wang Y, et al. (2011) Evaluation of the coverage and depth of transcriptome by RNA-Seq in chickens. *BMC Bioinf* 12 Suppl 10:S5.
20. Leimena MM, et al. (2012) Comparative analysis of *Lactobacillus plantarum* WCFS1 transcriptomes by using DNA microarray and next-generation sequencing technologies. *Appl Environ Microbiol* 78:4141-4148.
21. Ning K, Fermin D, Nesvizhskii AI (2012) Comparative analysis of different label-free mass spectrometry based protein abundance estimates and their correlation with RNA-Seq gene expression data. *J Proteome Res* 11:2261-2271.
22. Raghavachari N, et al. (2012) A systematic comparison and evaluation of high density exon arrays and RNA-seq technology used to unravel the peripheral blood transcriptome of sickle cell disease. *BMC Med Genomics* 5:28.
23. Matkovich SJ, Zhang Y, Van Booven DJ, Dorn GW 2nd (2010) Deep mRNA sequencing for in vivo functional analysis of cardiac transcriptional regulators: application to Galphaq. *Circ Res* 106:1459-1467.
24. Peltier HJ, Latham GJ (2008) Normalization of microRNA expression levels in quantitative RT-PCR assays: identification of suitable reference RNA targets in normal and cancerous human solid tissues. *RNA* 14:844-852.
25. Takamizawa J, et al. (2004) Reduced expression of the let-7 microRNAs in human lung cancers in association with shortened postoperative survival. *Cancer Res* 64:3753-3756.
26. Mayer C, Grummt I (2006) Ribosome biogenesis and cell growth: mTOR coordinates transcription by all three classes of nuclear RNA polymerases. *Oncogene* 25:6384-6391.
27. Valadi H, et al. (2007) Exosome-mediated transfer of mRNAs and microRNAs is a novel mechanism of genetic exchange between cells. *Nat Cell Biol* 9:654-659.
28. Matkovich SJ, Van Booven DJ, Eschenbacher WH, Dorn GW 2nd (2011) RISC RNA sequencing for context-specific identification of in vivo microRNA targets. *Circ Res* 108:18-26.
29. Mortazavi A, Williams BA, McCue K, Schaeffer L, Wold B (2008) Mapping and quantifying mammalian transcriptomes by RNA-Seq. *Nat Methods* 5:621-628.
30. Dorn GW 2nd, et al. (2011) MARF and Opa1 control mitochondrial and cardiac function in *Drosophila*. *Circ Res* 108:12-17.
31. Zhang Y, et al. (2011) Nuclear effects of g-protein receptor kinase 5 on histone deacetylase 5-regulated gene transcription in heart failure. *Circ: Heart Failure* 4:659-668.
32. Xiang SY, et al. (2011) RhoA protects the mouse heart against ischemia/reperfusion injury. *J Clin Invest* 121:3269-3276.
33. Zhang Y, et al. (2011) Receptor-independent protein kinase Ca (PKC $\alpha$ ) signaling by calpain-generated free catalytic domains induces HDAC5 nuclear export and regulates cardiac transcription. *J Biol Chem* 286:26943-26951.
34. Kim JB, et al. (2007) Polony multiplex analysis of gene expression (PMAGE) in mouse hypertrophic cardiomyopathy. *Science* 316:1481-1484.
35. Buermans HP, Ariyurek Y, van Ommen G, den Dunnen JT, t Hoen PA (2010) New methods for next generation sequencing based microRNA expression profiling. *BMC Genomics* 11:716.

36. Vandesompele J, et al. (2002) Accurate normalization of real-time quantitative RT-PCR data by geometric averaging of multiple internal control genes. *Genome Biol* 3:RESEARCH0034.
37. Fang Z, Cui X (2011) Design and validation issues in RNA-seq experiments. *Briefings Bioinf* 12:280-287.
38. Anders S, Huber W (2010) Differential expression analysis for sequence count data. *Genome Biol* 11:R106.
39. Raddatz K, Albrecht D, Hochgrafe F, Hecker M, Gotthardt M (2008) A proteome map of murine heart and skeletal muscle. *Proteomics* 8:1885-1897.
40. Maere S, Heymans K, Kuiper M (2005) BiNGO: a Cytoscape plugin to assess overrepresentation of gene ontology categories in biological networks. *Bioinformatics* 21:3448-3449.
41. Dorn GW 2nd, Matkovich SJ, Eschenbacher WH, Zhang Y (2012) A Human 3' miR-499 Mutation Alters Cardiac mRNA Targeting and Function. *Circ Res* 110:958-967.
42. Pearson WR, Lipman DJ (1988) Improved tools for biological sequence comparison. *Proc Natl Acad Sci USA* 85:2444-2448.
43. Varani G, McClain WH (2000) The G x U wobble base pair. A fundamental building block of RNA structure crucial to RNA function in diverse biological systems. *EMBO Rep* 1:18-23.
